# Supplementary material for: Key Components, Current Practice and Clinical Outcomes of ERAS Programs in Patients Undergoing Orthopedic Surgery: A Systematic Review
Source: MDPI journal article supplement (doi:10.3390/jcm11144222), 2022-07-20
Supplement: s1 [file s1]

**Table S1:** Search terms used in the PubMed, Scopus, and Web of Science Core Collection.

| Database                       | Free-vocabulary and/or Medical Subject Headings (MeSH) terms                                                                                                                                                                                                                                                                                                                                                                                                                                                                                                                                                                                                                                                                                                                                                                                                                                                                                                                                                                                                                                                                                                                                                                                                                                                                                                                                                                                                                                                                                                                                 |
|--------------------------------|----------------------------------------------------------------------------------------------------------------------------------------------------------------------------------------------------------------------------------------------------------------------------------------------------------------------------------------------------------------------------------------------------------------------------------------------------------------------------------------------------------------------------------------------------------------------------------------------------------------------------------------------------------------------------------------------------------------------------------------------------------------------------------------------------------------------------------------------------------------------------------------------------------------------------------------------------------------------------------------------------------------------------------------------------------------------------------------------------------------------------------------------------------------------------------------------------------------------------------------------------------------------------------------------------------------------------------------------------------------------------------------------------------------------------------------------------------------------------------------------------------------------------------------------------------------------------------------------|
| PubMed                         | ((("musculoskeletal diseases"[MeSH Terms] OR ("musculoskeletal"[All Fields] AND "diseases"[All Fields]) OR "musculoskeletal diseases"[All Fields] OR ("orthopedic"[All Fields] AND "disorders"[All Fields]) OR "orthopedic disorders"[All Fields] OR ("orthopaedic surgery"[All Fields] OR "orthopedics"[MeSH Terms] OR "orthopedics"[All Fields] OR ("orthopedic"[All Fields] AND "surgery"[All Fields]) OR "orthopedic surgery"[All Fields])) AND ("fast-track"[All Fields] OR ("enhanced recovery after surgery"[MeSH Terms] OR ("enhanced"[All Fields] AND "recovery"[All Fields] AND "after"[All Fields] AND "surgery"[All Fields]) OR "enhanced recovery after surgery"[All Fields]) OR (("enhance"[All Fields] OR "enhanced"[All Fields] OR "enhancement"[All Fields] OR "enhancements"[All Fields] OR "enhancer"[All Fields] OR "enhancer s"[All Fields] OR "enhancers"[All Fields] OR "enhances"[All Fields] OR "enhancing"[All Fields]) AND ("recoveries"[All Fields] OR "recovery"[All Fields]) AND ("program"[All Fields] OR "program s"[All Fields] OR "programe"[All Fields] OR "programed"[All Fields] OR "programes"[All Fields] OR "programming"[All Fields] OR "programmability"[All Fields] OR "programmable"[All Fields] OR "programmably"[All Fields] OR "programme"[All Fields] OR "programme s"[All Fields] OR "programmed"[All Fields] OR "programmer"[All Fields] OR "programmer s"[All Fields] OR "programmers"[All Fields] OR "programmes"[All Fields] OR "programming"[All Fields] OR "programmings"[All Fields] OR "programs"[All Fields]))) AND (y_10[Filter]) |
| Web of Science Core Collection | (TS = orthopedic disorders OR TS = orthopedic surgery) AND (TS = fast-track OR TS = enhanced recovery after surgery OR TS = enhanced recovery programs)<br>- with Publication Year from 2011 to 2021                                                                                                                                                                                                                                                                                                                                                                                                                                                                                                                                                                                                                                                                                                                                                                                                                                                                                                                                                                                                                                                                                                                                                                                                                                                                                                                                                                                         |
| Scopus                         | (TITLE-ABS-KEY (orthopedic AND disorders) OR TITLE-ABS-KEY (orthopedic AND surgery) AND TITLE-ABS-KEY (fast-track) OR TITLE-ABS-KEY (enhanced AND recovery AND after AND surgery) OR TITLE-ABS-KEY (enhanced AND recovery AND programs)) AND PUBYEAR > 2010                                                                                                                                                                                                                                                                                                                                                                                                                                                                                                                                                                                                                                                                                                                                                                                                                                                                                                                                                                                                                                                                                                                                                                                                                                                                                                                                  |

**Table S2:** National Heart, Lung, and Blood Institute (NHLBI) quality assessment tool.

| Reference                    | Criteria |   |   |   |   |   |   |    |   |    |    |    |    |    |
|------------------------------|----------|---|---|---|---|---|---|----|---|----|----|----|----|----|
|                              | 1        | 2 | 3 | 4 | 5 | 6 | 7 | 8  | 9 | 10 | 11 | 12 | 13 | 14 |
| Aasvang et al. 2016 [25]     |          |   |   |   |   |   |   | NA |   |    |    |    |    |    |
| Adams et al. 2021 [26]       |          |   |   |   |   |   |   | NA |   |    |    |    |    |    |
| Adeyemo et al. 2021 [27]     |          |   |   |   |   |   |   | NA |   |    |    |    |    |    |
| Alvis et al. 2021 [28]       |          |   |   |   |   |   |   | NA |   |    |    |    |    |    |
| Andreasen et al. 2017 [29]   |          |   |   |   |   |   |   | NA |   |    |    |    |    |    |
| Ascione et al. 2020 [30]     |          |   |   |   |   |   |   | NA |   |    |    |    |    |    |
| Auyong et al. 2015 [31]      |          |   |   |   |   |   |   | NA |   |    |    |    |    |    |
| Awada et al. 2019 [32]       |          |   |   |   |   |   |   | NA |   |    |    |    |    |    |
| Bandholm et al. 2014 [33]    |          |   |   |   |   |   |   | NA |   |    |    |    |    |    |
| Berg et al. 2018 [34]        |          |   |   |   |   |   |   | NA |   |    |    |    |    |    |
| Berg et al. 2020 [35]        |          |   |   |   |   |   |   | NA |   |    |    |    |    |    |
| Berg et al. 2021 [36]        |          |   |   |   |   |   |   | NA |   |    |    |    |    |    |
| Bernaus et al. 2021 [37]     |          |   |   |   |   |   |   | NA |   |    |    |    |    |    |
| Berthelsen et al. 2017 [38]  |          |   |   |   |   |   |   | NA |   |    |    |    |    |    |
| Birznies et al. 2019 [39]    |          |   |   |   |   |   |   | NA |   |    |    |    |    |    |
| Bjerregaard et al. 2015 [40] |          |   |   |   |   |   |   | NA |   |    |    |    |    |    |
| Bjerregaard et al. 2016 [41] |          |   |   |   |   |   |   | NA |   |    |    |    |    |    |

|                                 |  |  |  |  |  |  |    |    |  |    |  |  |  |  |
|---------------------------------|--|--|--|--|--|--|----|----|--|----|--|--|--|--|
| Cao et al. 2020 [42]            |  |  |  |  |  |  |    | NA |  |    |  |  |  |  |
| Castle et al. 2021 [43]         |  |  |  |  |  |  | NR | NA |  | NR |  |  |  |  |
| Castorina et al. 2018 [44]      |  |  |  |  |  |  |    | NA |  |    |  |  |  |  |
| Christelis et al. 2015 [45]     |  |  |  |  |  |  |    | NA |  |    |  |  |  |  |
| Concina et al. 2019 [46]        |  |  |  |  |  |  | NR | NA |  |    |  |  |  |  |
| Collett et al. 2021 [47]        |  |  |  |  |  |  |    | NA |  | NR |  |  |  |  |
| Cui et al. 2019 [48]            |  |  |  |  |  |  |    | NA |  |    |  |  |  |  |
| D'Amato et al. 2019 [49]        |  |  |  |  |  |  |    | NA |  |    |  |  |  |  |
| d'Astorg et al. 2020 [50]       |  |  |  |  |  |  |    | NA |  |    |  |  |  |  |
| Dagal et al. 2019 [51]          |  |  |  |  |  |  |    | NA |  |    |  |  |  |  |
| Davies et al. 2018 [52]         |  |  |  |  |  |  |    | NA |  |    |  |  |  |  |
| Dawson-Bowling et al. 2014 [53] |  |  |  |  |  |  |    | NA |  |    |  |  |  |  |
| De Ladoucette et al. 2020 [54]  |  |  |  |  |  |  |    | NA |  |    |  |  |  |  |
| Debono et al. 2019 [55]         |  |  |  |  |  |  |    | NA |  |    |  |  |  |  |
| Debono et al. 2021 [56]         |  |  |  |  |  |  |    | NA |  |    |  |  |  |  |
| Deiter et al. 2020 [57]         |  |  |  |  |  |  |    | NA |  |    |  |  |  |  |
| den Hartog et al. 2015 [58]     |  |  |  |  |  |  | NR | NA |  |    |  |  |  |  |
| den Hartog et al. 2017 [59]     |  |  |  |  |  |  | NR | NA |  |    |  |  |  |  |
| Didden et al. 2019 [60]         |  |  |  |  |  |  | NR | NA |  |    |  |  |  |  |
| Ding et al. 2020 [61]           |  |  |  |  |  |  |    | NA |  |    |  |  |  |  |

|                             |  |  |  |  |  |  |    |    |  |  |  |  |  |  |
|-----------------------------|--|--|--|--|--|--|----|----|--|--|--|--|--|--|
| Drosos et al. 2016 [62]     |  |  |  |  |  |  |    | NA |  |  |  |  |  |  |
| Drosos et al. 2020 [63]     |  |  |  |  |  |  |    | NA |  |  |  |  |  |  |
| Dwyer et al. 2012 [64]      |  |  |  |  |  |  |    | NA |  |  |  |  |  |  |
| Dwyer et al. 2014 [65]      |  |  |  |  |  |  |    | NA |  |  |  |  |  |  |
| Fenelon et al. 2018 [66]    |  |  |  |  |  |  | NR | NA |  |  |  |  |  |  |
| Feng et al. 2019 [67]       |  |  |  |  |  |  |    | NA |  |  |  |  |  |  |
| Fletcher et al. 2020 [68]   |  |  |  |  |  |  |    | NA |  |  |  |  |  |  |
| Fletcher et al. 2021 [69]   |  |  |  |  |  |  |    | NA |  |  |  |  |  |  |
| Fransen et al. 2018 [70]    |  |  |  |  |  |  |    | NA |  |  |  |  |  |  |
| Frassanito et al. 2020 [71] |  |  |  |  |  |  |    | NA |  |  |  |  |  |  |
| Füssenich et al. 2020 [72]  |  |  |  |  |  |  |    | NA |  |  |  |  |  |  |
| Galbraith et al. 2017 [73]  |  |  |  |  |  |  |    | NA |  |  |  |  |  |  |
| Glassou et al. 2014 [74]    |  |  |  |  |  |  |    | NA |  |  |  |  |  |  |
| Gomez et al. 2019 [75]      |  |  |  |  |  |  |    | NA |  |  |  |  |  |  |
| Gomez et al. 2020 [76]      |  |  |  |  |  |  |    |    |  |  |  |  |  |  |
| Götz et al. 2021 [77]       |  |  |  |  |  |  |    | NA |  |  |  |  |  |  |
| Gromov et al. 2015 [78]     |  |  |  |  |  |  | NR | NA |  |  |  |  |  |  |
| Gromov et al. 2019 [79]     |  |  |  |  |  |  |    | NA |  |  |  |  |  |  |
| Gromov et al. 2020 [80]     |  |  |  |  |  |  |    | NA |  |  |  |  |  |  |
| Gupta et al. 2014 [81]      |  |  |  |  |  |  | NR | NA |  |  |  |  |  |  |

|                            |  |  |    |  |    |  |    |    |  |    |  |  |    |  |
|----------------------------|--|--|----|--|----|--|----|----|--|----|--|--|----|--|
| Halawi et al. 2019 [82]    |  |  | NR |  | NR |  |    | NA |  | NR |  |  |    |  |
| Hansson et al. 2015 [83]   |  |  |    |  |    |  |    | NA |  | NR |  |  |    |  |
| Hartog et al. 2015 [84]    |  |  |    |  |    |  |    | NA |  |    |  |  |    |  |
| He et al. 2020 [85]        |  |  |    |  |    |  | CD | NA |  |    |  |  | NR |  |
| Heo et al. 2019 [86]       |  |  |    |  |    |  |    | NA |  |    |  |  |    |  |
| Herndon et al. 2020 [87]   |  |  |    |  |    |  |    | NA |  | NR |  |  |    |  |
| Higgins et al. 2020 [88]   |  |  |    |  |    |  |    | NA |  | NR |  |  |    |  |
| Holm et al. 2014 [89]      |  |  |    |  |    |  |    | NA |  | NR |  |  |    |  |
| Holmes et al. 2019 [90]    |  |  |    |  |    |  | CD | NA |  |    |  |  |    |  |
| Hoorntje et al. 2017 [91]  |  |  |    |  |    |  |    | NA |  |    |  |  |    |  |
| Huang et al. 2021 [92]     |  |  |    |  |    |  |    | NA |  | NR |  |  |    |  |
| Husted et al. 2011a [93]   |  |  |    |  |    |  |    | NA |  |    |  |  |    |  |
| Husted et al. 2011b [12]   |  |  |    |  |    |  |    | NA |  |    |  |  |    |  |
| Husted et al. 2012 [94]    |  |  |    |  |    |  |    | NA |  | NR |  |  |    |  |
| Husted et al. 2016 [95]    |  |  |    |  |    |  |    | NA |  | NR |  |  |    |  |
| Imbelloni et al. 2014 [96] |  |  |    |  |    |  |    | NA |  |    |  |  |    |  |
| Jenny et al. 2020 [97]     |  |  |    |  |    |  |    | NA |  | NR |  |  |    |  |
| Jensen et al. 2020 [98]    |  |  |    |  |    |  |    | NA |  | NR |  |  |    |  |
| Jensen et al. 2021 [99]    |  |  |    |  |    |  |    | NA |  | NR |  |  |    |  |
| Jiang et al. 2019 [100]    |  |  |    |  |    |  |    | NA |  | NR |  |  |    |  |

|                                     |  |  |  |  |  |  |    |  |    |  |  |  |  |
|-------------------------------------|--|--|--|--|--|--|----|--|----|--|--|--|--|
| Jørgensen et al. 2013a [24]         |  |  |  |  |  |  | NA |  | NR |  |  |  |  |
| Jørgensen et al. 2013b [101]        |  |  |  |  |  |  | NA |  |    |  |  |  |  |
| Jørgensen et al. 2017 [102]         |  |  |  |  |  |  | NA |  |    |  |  |  |  |
| Jørgensen et al. 2021 [103]         |  |  |  |  |  |  | NA |  |    |  |  |  |  |
| Julien-Marsollier et al. 2020 [104] |  |  |  |  |  |  | NA |  |    |  |  |  |  |
| Kang et al. 2019 [105]              |  |  |  |  |  |  | NA |  | NR |  |  |  |  |
| Kerr et al. 2017 [106]              |  |  |  |  |  |  | NA |  | NR |  |  |  |  |
| Kilic et al. 2020 [107]             |  |  |  |  |  |  | NA |  |    |  |  |  |  |
| Klapwijk et al. 2017 [108]          |  |  |  |  |  |  | NA |  |    |  |  |  |  |
| Klement et al. 2019 [109]           |  |  |  |  |  |  | NA |  |    |  |  |  |  |
| Kolodziej et al. 2020 [110]         |  |  |  |  |  |  | NA |  | NR |  |  |  |  |
| Kort et al. 2018 [111]              |  |  |  |  |  |  | NA |  | NR |  |  |  |  |
| Krenk et al. 2012 [112]             |  |  |  |  |  |  | NA |  | NR |  |  |  |  |
| Krenk et al. 2014 [113]             |  |  |  |  |  |  | NA |  |    |  |  |  |  |
| Lamplot et al. 2014 [114]           |  |  |  |  |  |  | NA |  | NR |  |  |  |  |
| Larsen et al. 2012 [115]            |  |  |  |  |  |  | NA |  |    |  |  |  |  |
| Larsson et al. 2016 [116]           |  |  |  |  |  |  | NA |  | NR |  |  |  |  |
| Leiss et al. 2021 [117]             |  |  |  |  |  |  | NA |  | NR |  |  |  |  |
| Li et al. 2018 []                   |  |  |  |  |  |  | NA |  |    |  |  |  |  |
| Li et al. 2020a [119]               |  |  |  |  |  |  | NA |  |    |  |  |  |  |

|                                    |  |  |  |  |  |  |  |    |  |    |  |  |  |  |
|------------------------------------|--|--|--|--|--|--|--|----|--|----|--|--|--|--|
| Li et al. 2020b [120]              |  |  |  |  |  |  |  | NA |  | NR |  |  |  |  |
| Li et al. 2021a [121]              |  |  |  |  |  |  |  | NA |  |    |  |  |  |  |
| Li et al. 2021b [122]              |  |  |  |  |  |  |  | NA |  |    |  |  |  |  |
| Lindberg-Larsen et al. 2017 [123]  |  |  |  |  |  |  |  | NA |  |    |  |  |  |  |
| Lindberg-Larsen et al. 2018a [124] |  |  |  |  |  |  |  | NA |  |    |  |  |  |  |
| Lindberg-Larsen et al. 2018b [125] |  |  |  |  |  |  |  | NA |  |    |  |  |  |  |
| Lindberg-Larsen et al. 2019 [126]  |  |  |  |  |  |  |  | NA |  |    |  |  |  |  |
| Lovecchio et al. 2016 [127]        |  |  |  |  |  |  |  | NA |  | NR |  |  |  |  |
| Machin et al. 2013 [128]           |  |  |  |  |  |  |  | NA |  | NR |  |  |  |  |
| Maempel et al. 2015 [129]          |  |  |  |  |  |  |  | NA |  |    |  |  |  |  |
| Mangat et al. 2020 [130]           |  |  |  |  |  |  |  | NA |  |    |  |  |  |  |
| McDonald et al. 2012 [131]         |  |  |  |  |  |  |  | NA |  |    |  |  |  |  |
| Memtsoudis et al. 2020 [132]       |  |  |  |  |  |  |  | NA |  |    |  |  |  |  |
| Mikkelsen et al. 2014 [133]        |  |  |  |  |  |  |  | NA |  |    |  |  |  |  |
| Munk et al. 2012 [134]             |  |  |  |  |  |  |  | NA |  |    |  |  |  |  |
| Nazarenko et al. 2016 [135]        |  |  |  |  |  |  |  | NA |  |    |  |  |  |  |
| Nicolaiciuc et al. 2019 [136]      |  |  |  |  |  |  |  | NA |  |    |  |  |  |  |
| Noel et al. 2020 [137]             |  |  |  |  |  |  |  | NA |  |    |  |  |  |  |
| Okamoto et al. 2016 [138]          |  |  |  |  |  |  |  | NA |  | NR |  |  |  |  |
| Otte et al. 2011 [139]             |  |  |  |  |  |  |  | NA |  | NR |  |  |  |  |

|                                |  |  |  |  |  |    |    |  |    |  |  |  |  |  |
|--------------------------------|--|--|--|--|--|----|----|--|----|--|--|--|--|--|
| Pamilo et al. 2018 [140]       |  |  |  |  |  |    | NA |  |    |  |  |  |  |  |
| Petersen et al. 2017 [141]     |  |  |  |  |  | CD | NA |  |    |  |  |  |  |  |
| Petersen et al. 2019 [142]     |  |  |  |  |  |    | NA |  | NR |  |  |  |  |  |
| Petersen et al. 2020a [143]    |  |  |  |  |  |    | NA |  |    |  |  |  |  |  |
| Petersen et al. 2020b [144]    |  |  |  |  |  |    | NA |  |    |  |  |  |  |  |
| Petersen et al. 2021 [145]     |  |  |  |  |  |    | NA |  |    |  |  |  |  |  |
| Pirsaharkhiz et al. 2020 [146] |  |  |  |  |  | CD | NA |  |    |  |  |  |  |  |
| Pitter et al. 2016 [147]       |  |  |  |  |  |    | NA |  |    |  |  |  |  |  |
| Plenge et al. 2020 [148]       |  |  |  |  |  |    | NA |  |    |  |  |  |  |  |
| Plessl et al 2020 []           |  |  |  |  |  |    | NA |  |    |  |  |  |  |  |
| Pollmann et al. 2016 [150]     |  |  |  |  |  |    | NA |  |    |  |  |  |  |  |
| Porsius et al. 2018 [151]      |  |  |  |  |  |    | NA |  |    |  |  |  |  |  |
| Prkić et al. 2020 [152]        |  |  |  |  |  |    | NA |  |    |  |  |  |  |  |
| Robinson et al. 2014 [153]     |  |  |  |  |  |    | NA |  |    |  |  |  |  |  |
| Romano et al. 2021 [154]       |  |  |  |  |  |    | NA |  |    |  |  |  |  |  |
| Ruiz et al. 2018 [155]         |  |  |  |  |  |    | NA |  |    |  |  |  |  |  |
| Rytter et al. 2017 [156]       |  |  |  |  |  |    | NA |  |    |  |  |  |  |  |
| Saku et al. 2019 [157]         |  |  |  |  |  |    | NA |  |    |  |  |  |  |  |
| Savaridas et al. 2013 [158]    |  |  |  |  |  |    | NA |  |    |  |  |  |  |  |
| Schotanus et al. 2017 [159]    |  |  |  |  |  |    | NA |  |    |  |  |  |  |  |



|                                |  |  |  |  |  |  |    |    |  |  |  |  |  |  |
|--------------------------------|--|--|--|--|--|--|----|----|--|--|--|--|--|--|
| Shaw et al. 2021 [160]         |  |  |  |  |  |  |    | NA |  |  |  |  |  |  |
| Skovgaard et al. 2013 [161]    |  |  |  |  |  |  |    | NA |  |  |  |  |  |  |
| Soffin et al. 2019b [162]      |  |  |  |  |  |  |    | NA |  |  |  |  |  |  |
| Soffin et al. 2019a [20]       |  |  |  |  |  |  |    | NA |  |  |  |  |  |  |
| Soffin et al. 2019c [163]      |  |  |  |  |  |  | CD | NA |  |  |  |  |  |  |
| Soffin et al. 2020 [164]       |  |  |  |  |  |  |    | NA |  |  |  |  |  |  |
| Specht et al. 2011 [165]       |  |  |  |  |  |  |    | NA |  |  |  |  |  |  |
| Staartjes et al. 2019 [166]    |  |  |  |  |  |  |    | NA |  |  |  |  |  |  |
| Stambough et al. 2019 []       |  |  |  |  |  |  |    | NA |  |  |  |  |  |  |
| Starks et al. 2014 [168]       |  |  |  |  |  |  |    | NA |  |  |  |  |  |  |
| Stowers et al. 2016 [169]      |  |  |  |  |  |  |    | NA |  |  |  |  |  |  |
| Talboy et al. 2016 [170]       |  |  |  |  |  |  |    | NA |  |  |  |  |  |  |
| Tan et al. 2018 []             |  |  |  |  |  |  |    | NA |  |  |  |  |  |  |
| Temporiti et al 2020 [172]     |  |  |  |  |  |  |    | NA |  |  |  |  |  |  |
| Tucker et al. 2016 [173]       |  |  |  |  |  |  |    | NA |  |  |  |  |  |  |
| van den Belt et al. 2015 [174] |  |  |  |  |  |  |    | NA |  |  |  |  |  |  |
| Van Egmond et al. 2015 [175]   |  |  |  |  |  |  |    | NA |  |  |  |  |  |  |
| Van Horne et al. 2019a [176]   |  |  |  |  |  |  |    | NA |  |  |  |  |  |  |
| Van Horne et al. 2019b [177]   |  |  |  |  |  |  |    | NA |  |  |  |  |  |  |

|                                |  |  |  |  |  |  |    |  |  |  |  |  |  |  |
|--------------------------------|--|--|--|--|--|--|----|--|--|--|--|--|--|--|
| Venkata et al. 2018 [178]      |  |  |  |  |  |  | NA |  |  |  |  |  |  |  |
| Vesterby et al. 2017 [179]     |  |  |  |  |  |  | NA |  |  |  |  |  |  |  |
| Wang et al. 2018a [21]         |  |  |  |  |  |  | NA |  |  |  |  |  |  |  |
| Wang et al. 2018b [22]         |  |  |  |  |  |  | NA |  |  |  |  |  |  |  |
| Wang et al. 2019 [23]          |  |  |  |  |  |  | NA |  |  |  |  |  |  |  |
| Wang et al. 2020 [180]         |  |  |  |  |  |  | NA |  |  |  |  |  |  |  |
| Wharton et al. 2020 [181]      |  |  |  |  |  |  | NA |  |  |  |  |  |  |  |
| Wied et al. 2015 [182]         |  |  |  |  |  |  | NA |  |  |  |  |  |  |  |
| Winther et al. 2015 [183]      |  |  |  |  |  |  | NA |  |  |  |  |  |  |  |
| Wynell-Mayow et al. 2018 [184] |  |  |  |  |  |  | NA |  |  |  |  |  |  |  |
| Xie et al. 2019 [185]          |  |  |  |  |  |  | NA |  |  |  |  |  |  |  |
| Xu et al. 2019 [186]           |  |  |  |  |  |  | NA |  |  |  |  |  |  |  |
| Yang et al. 2020 [187]         |  |  |  |  |  |  | NA |  |  |  |  |  |  |  |
| Yanik et al. 2018 [188]        |  |  |  |  |  |  | NA |  |  |  |  |  |  |  |
| Yu et al. 2018 [189]           |  |  |  |  |  |  | NA |  |  |  |  |  |  |  |
| Zhang et al. 2020 []           |  |  |  |  |  |  | NA |  |  |  |  |  |  |  |
| Zietek et al. 2015 [191]       |  |  |  |  |  |  | NA |  |  |  |  |  |  |  |
| Zietek et al. 2016 [192]       |  |  |  |  |  |  | NA |  |  |  |  |  |  |  |

1. Was the research question or objective in this paper clearly stated? 2. Was the study population clearly specified and defined? 3. Was the participation rate of eligible persons at least 50%? 4. Were all the subjects selected or recruited from the same or similar populations (including the same time period)? Were inclusion and exclusion criteria for being in

the study prespecified and applied uniformly to all participants? **5.** Was a sample size justification, power description, or variance and effect estimates provided? **6.** For the analyses in this paper, were the exposure(s) of interest measured prior to the outcome(s) being measured? **7.** Was the timeframe sufficient so that one could reasonably expect to see an association between exposure and outcome if it existed? **8.** For exposures that can vary in amount or level, did the study examine different levels of the exposure as related to the outcome (e.g., categories of exposure, or exposure measured as continuous variable)? **9.** Were the exposure measures (independent variables) clearly defined, valid, reliable, and implemented consistently across all study participants? **10.** Was the exposure(s) assessed more than once over time? **11.** Were the outcome measures (dependent variables) clearly defined, valid, reliable, and implemented consistently across all study participants? **12.** Were the outcome assessors blinded to the exposure status of participants? **13.** Was loss to follow-up after baseline 20% or less? **14.** Were key potential confounding variables measured and adjusted statistically for their impact on the relationship between exposure(s) and outcome(s)? ■ **Yes** ■ **No**. **CD**, cannot determine; **NA**, not applicable; **NR**, not reported.

**Table S3.** Basic characteristics of included literatures studies on spine orthopedic surgery.

| References               | Study design  | Pathological condition | Patients number, age (years) and gender (%)                                                                                                           | Surgical procedure           | Follow-up | Outcomes/Endpoints                                                                                                                                                                                                                                                                         |
|--------------------------|---------------|------------------------|-------------------------------------------------------------------------------------------------------------------------------------------------------|------------------------------|-----------|--------------------------------------------------------------------------------------------------------------------------------------------------------------------------------------------------------------------------------------------------------------------------------------------|
| Adeyemo et al. 2021 [27] | Retrospective | Degenerative scoliosis | 124 patients:<br><br>-Fast-track group (n=67, mean age 68.49±8.72, 60% females);<br><br>-Non-fast-track group (n=57, mean age 69.7±8.23, 67% females) | Thoraco-lumbar-pelvic fusion | 90 days   | ↓Opioid consumption (248,05 mg vs. 314,05 mg), urinary retention requiring catheterization (5,97% vs. 19,3%), severe constipation (1,49% vs. 31,57%), readmissions (2,98% vs. 28,07%), blood loss intraoperatively (1284,84 ml vs. 1691.8 ml) in fast-track group vs. non-fast-track group |
| Dagal et al. 2019 [51]   | Retrospective | NR                     | 450 patients:<br><br>-Fast-track group (n=267, mean age 60±12, 55.4% females);                                                                        | Major elective spine surgery | 30 days   | ↓LOS, ILOS, costs and ICU admissions (48% vs. 60%) in fast-track vs. non-fast-track group                                                                                                                                                                                                  |

|                           |               |                                 |                                                                                                                                                                                                                                                                                                                                                               |                                        |                                                     |                                                                                                                                                                                                                                              |
|---------------------------|---------------|---------------------------------|---------------------------------------------------------------------------------------------------------------------------------------------------------------------------------------------------------------------------------------------------------------------------------------------------------------------------------------------------------------|----------------------------------------|-----------------------------------------------------|----------------------------------------------------------------------------------------------------------------------------------------------------------------------------------------------------------------------------------------------|
|                           |               |                                 | -Non-fast-track group (n=183, mean age 61±14, 56.2% females)                                                                                                                                                                                                                                                                                                  |                                        |                                                     |                                                                                                                                                                                                                                              |
| d'Astorg et al. 2020 [50] | Retrospective | Spinal deformities              | 386 patients:<br><br>-Fast-track group (n=193, mean age 46±12);<br><br>-Non-fast-track group (n=193, mean age 46±13)                                                                                                                                                                                                                                          | Microdiscectomy, arthrodesis, stenosis | 1 year (arthrodesis) and 3 months (microdiscectomy) | ↓LOS in fast-track group vs. non-fast-track group (2,6 vs. 4,4 days)                                                                                                                                                                         |
| Debono et al. 2019 [55]   | Retrospective | Scoliosis and large deformities | 3483 patients:<br><br>-Fast-track group (n=1920: 202 ALIF, mean age 46.3±10.7, 49% females; 612 ACDF, mean age 48.7±8.7, 49% females; 1106 posterior fusion, mean age 56.1±10.2, 50.9% females);<br><br>-Non-fast-track group (n=1563: 159 ALIF, mean age 44.5±8.6, 56.6% females; 749 ACDF, mean age 47.6±9.9, 45.6% females; 655 posterior fusion, mean age | ALIF, ACDF, posterior lumbar fusion    | 90 days                                             | ↓LOS in fast-track group vs. non-fast-track group (3.33±0.8 vs. 6.06±1.1 days for ALIF, 1.3±0.7 vs. 3.08±0.9 for ACDF, 4.8±2.3 vs. 6.7±4.8 for posterior fusion).<br>↓complications for lumbar fusions in fast-track group (10.9% vs. 14.8%) |

|                           |               |                                                                                                                               |                                                                                                                                                 |          |                           |                                                                                                                                                         |
|---------------------------|---------------|-------------------------------------------------------------------------------------------------------------------------------|-------------------------------------------------------------------------------------------------------------------------------------------------|----------|---------------------------|---------------------------------------------------------------------------------------------------------------------------------------------------------|
|                           |               |                                                                                                                               | 53.8±14.3, 49.7% females)                                                                                                                       |          |                           |                                                                                                                                                         |
| Debono et al. 2021 [56]   | Retrospective | Radiculopathy with disc prolapse either hard (osteophytic) or soft and failed conservative treatment                          | 404 patients:<br>-Fast-track group (n=202, mean age 48.5±10.6, 49% females);<br>-Non-fast-track group (n=202, mean age 48.7±9.2, 47.5% females) | ACDF     | 30 and 90 days, 12 months | ↓LOS in fast-track group vs. non-fast-track group (1.40±0.6 vs. 2.96±1.35 days)                                                                         |
| Feng et al. 2019 [67]     | Retrospective | Lumbar spinal stenosis, spondylolisthesis, degenerative lumbosacral spine diseases, radiculopathy, or neurogenic claudication | 74 patients:<br>-Fast-track group (n=44, mean age 61±10, 63.6% females);<br>-Non-fast-track group (n=30, mean age 59±9, 70% females)            | MIS-TLIF | 30 days                   | ↓LOS (5 vs. 7 days), costs, blood loss, operative time, fluid infusion and drainage in fast-track group vs. non-fast-track group                        |
| Fletcher et al. 2020 [68] | Retrospective | NMS                                                                                                                           | 197 patients (13.2±3.2 age, 110 females, 87 males):<br>-Fast-track + LOS <3 days group (n=56);<br>-Fast-track + LOS 3-7 days group (n=111);     | PSF      | 180 days                  | ↓Operative time, levels fused, fusion to pelvis, pulmonary complication, blood transfusion in LOS <3 days group vs. LOS 3-7 days and LOS >7 days groups |

|                           |               |                                                                                                                           |                                                                                                                                                                     |                                     |                      |                                                                                                                                                                                                                                       |
|---------------------------|---------------|---------------------------------------------------------------------------------------------------------------------------|---------------------------------------------------------------------------------------------------------------------------------------------------------------------|-------------------------------------|----------------------|---------------------------------------------------------------------------------------------------------------------------------------------------------------------------------------------------------------------------------------|
|                           |               |                                                                                                                           | -Fast-track + LOS >7 days group (n=30)                                                                                                                              |                                     |                      |                                                                                                                                                                                                                                       |
| Fletcher et al. 2021 [69] | Prospective   | AIS                                                                                                                       | <p>276 patients:</p> <p>-Fast-track group (n=203, mean age 14.3±2.1, 78.8% females);</p> <p>-Non-fast-track group (n=73, mean age 16.09±2.1, 80.2% females)</p>     | PSF                                 | 4 weeks              | ↓LOS (2,2 vs. 4,8 days), operative time (2,8 vs. 4,8 h), blood loss (240 vs. 500cc), curve magnitudes (54,0° vs. 62,0°), osteotomies (46% vs. 94%), levels fused (10,1±2,6 vs. 11,4±1,6) in fast-track group vs. non-fast-track group |
| He et al. 2020 [85]       | Prospective   | Lumbar disc herniation, stenosis, or spondylolisthesis with unilateral radiculopathy                                      | <p>40 patients:</p> <p>-Fast-track + TXA group (n=20, mean age 57.95±12.44, 60% females);</p> <p>-Non-fast-track group (n=20, mean age 57.9±11.76, 45% females)</p> | One-level or two-level TLIF surgery | NR                   | ↓Blood loss and ambulation time in fast-track + TXA group vs. non-fast-track group                                                                                                                                                    |
| Heo et al. 2019 [86]      | Retrospective | Low-grade degenerative spondylolisthesis, low-grade isthmic spondylolisthesis, central stenosis with instability, central | <p>69 patients:</p> <p>-Fast-track group (endoscopic TLIF, n=23, mean age 61.4±9.4, 69.6% females);</p> <p>-Non-fast-track, (microscopic TLIF, n=46, mean age</p>   | Microscopic or endoscopic TLIF      | Mean 13.4±2.5 months | ↑VAS score (days 1 and 2) in non-fast track vs. fast-track group. ↑operative time and ↓EBL in fast-track group vs. non-fast-track group. complications=6 in non-fast-track group and 2 in fast-track group                            |

|                                     |               |                                                                                    |                                                                                                                                                              |                               |         |                                                                                                                                                                                                      |
|-------------------------------------|---------------|------------------------------------------------------------------------------------|--------------------------------------------------------------------------------------------------------------------------------------------------------------|-------------------------------|---------|------------------------------------------------------------------------------------------------------------------------------------------------------------------------------------------------------|
|                                     |               | stenosis with concomitant foraminal stenosis                                       | 63.5±10.5, 58.6% females)                                                                                                                                    |                               |         |                                                                                                                                                                                                      |
| Julien-Marsollier et al. 2020 [104] | Retrospective | AIS                                                                                | 163 patients (<18 age):<br><br>-Fast-track group (n=81);<br><br>-Non-fast-track group (n=82)                                                                 | PSF                           | 30 days | ↓LOS, morphine consumption (25% and 35%, days 2 and 3), constipation (day 2), pain intensity at rest and movement (day 2 and 3) in fast-track group vs. non-fast-track group                         |
| Kilic et al. 2020 [107]             | Retrospective | Idiopathic lumbar scoliosis, degenerative spondylolisthesis, spinal canal stenosis | 174 patients:<br><br>-Fast-track group (n=86, mean age 54.79±13.73, 53.4% females);<br><br>-Non-fast-track group (n=88, mean age 49.77±16.96, 53.4% females) | Lumbar spine instrumentations | 30 days | ↓Intraoperative blood loss, blood transfusion rate, LOS, pain scores, total costs, first oral intake and mobilization in fast-track group vs. non-fast-track group                                   |
| Li et al. 2018 [118]                | Retrospective | Degenerative multilevel spine compression, spinal canal stenosis                   | 224 patients:<br><br>-Fast-track group (n=114, mean age 58.53±10.71, 42.1% females);<br><br>-Non-fast-track group (n=110, mean age 56.88±8.82, 39% females)  | Cervical laminoplasty         | 3 days  | ↓LOS (5.75±2.46 vs. 7.67±3.45 days), assisted walking, urinary catheters time, drainage catheters time, VAS score (2.72±0.46 vs. 3.35±0.46) maximum VAS score (3.76±1.12 vs. 4.35±1.15), food-taking |

|                             |               |                                                               |                                                                                                                                                  |                                      |                   |                                                                                                                                                                                                                                                                                      |
|-----------------------------|---------------|---------------------------------------------------------------|--------------------------------------------------------------------------------------------------------------------------------------------------|--------------------------------------|-------------------|--------------------------------------------------------------------------------------------------------------------------------------------------------------------------------------------------------------------------------------------------------------------------------------|
|                             |               |                                                               |                                                                                                                                                  |                                      |                   | in fast-track group vs. non-fat-track group                                                                                                                                                                                                                                          |
| Li et al. 2020a [119]       | Retrospective | Lumbar stenosis with instability, scoliosis/spondylolisthesis | Fast-track group: 260 patients                                                                                                                   | Open posterior lumbar fusion surgery | 30 days           | Overall compliance rate: 92.9% (91 patients in the higher compliance group and 169 patients into the lower compliance group). LOS of patients with higher compliance shorter than that of patients with lower compliance.<br>↓complications in patients with higher compliance group |
| Li et al. 2021a [121]       | Retrospective | Lumbar stenosis                                               | 127 patients:<br><br>-Fast-track group (n=60, mean age 73.6±3.2, 63.3% females);<br><br>-Non-fast-track (n=67, mean age 74.3±4.2, 59.7% females) | Open lumbar arthrodesis              | 30 days           | ↓LOS (13.6±4.0 vs. 15.6±3.9 days), complications (8.3% vs. 20.9%), VAS (day 1 and 2) in fast-track group vs. control group                                                                                                                                                           |
| Nazarenko et al. 2016 [135] | Prospective   | Lumbosacral spine herniated intervertebral discs              | 48 patients:<br><br>-Fast-track group (n=23, mean age 44.3, 39.1% females);                                                                      | Microdiscectomy                      | 1, 3 and 6 months | ↓VAS pain (by 10%, at discharge and 1 month), LOS (by 39%), and ↑functional activity (Oswestry index and Roland-Morris scale, by                                                                                                                                                     |



|                           |               |     |                                                                                                                                                                       |                                         |         |                                                                                                                               |
|---------------------------|---------------|-----|-----------------------------------------------------------------------------------------------------------------------------------------------------------------------|-----------------------------------------|---------|-------------------------------------------------------------------------------------------------------------------------------|
|                           |               |     | -Non-fast-track group (n=25, mean age 42.2, 44% females)                                                                                                              |                                         |         | 20%) in fast-track group vs. non-fast-track group                                                                             |
| Shaw et al. 2021 [160]    | Retrospective | AIS | 78 patients:<br><br>-Fast-track + methadone group (n=26, mean age 15.1±1.9);<br><br>-Fast-track group (no methadone, n=52, mean age 14.9±1.9)                         | PSF                                     | 90 days | ↓LOS (2.7±0.7 vs. 3.1±0.6) in fast-track + methadone group vs. fast-track alone group                                         |
| Soffin et al. 2019b [162] | Retrospective | NR  | 61 patients:<br><br>-Fast-track + microdiscectomy group (n=34, mean age 46, 50% females);<br><br>-Fast-track + decompression group (n=27, mean age 65, 48.4% females) | Lumbar microdiscectomy or decompression | 90 days | ↓LOS, operative time (48.8±12.7 vs. 64.1±28.6 min) in fast-track + microdiscectomy group vs. fast-track + decompression group |
| Soffin et al. 2019a [20]  | Retrospective | NR  | 33 patients:<br><br>-Fast-track and ACDF group (n=25, mean age 58, 80% females);<br><br>-Fast-track and CDA group (n=8, mean age 44, 75% females)                     | ACDF or CDA                             | 90 days | =Operative time, EBL, LOS                                                                                                     |

|                             |               |                                                                                        |                                                                                                                                                                                   |                                                                                                             |                        |                                                                                                                                                                                                                                                                                                                 |
|-----------------------------|---------------|----------------------------------------------------------------------------------------|-----------------------------------------------------------------------------------------------------------------------------------------------------------------------------------|-------------------------------------------------------------------------------------------------------------|------------------------|-----------------------------------------------------------------------------------------------------------------------------------------------------------------------------------------------------------------------------------------------------------------------------------------------------------------|
| Soffin et al. 2019c [163]   | Retrospective | NR                                                                                     | <p>36 patients:</p> <p>-Fast-track + OFA group (n=18, mean age 1.5±18.92, 44.4% females, 10 males);</p> <p>-Fast-track + OCA group (n=18, mean age 60.14±15.4, 44.4% females)</p> | Elective lumbar decompression                                                                               | NR                     | ↓ Perioperative opioid use (2.43±0.86 vs. 38.125±6.11 OMEs), LOS in fast-track + OFA group vs. fast-track + OCA group                                                                                                                                                                                           |
| Soffin et al. 2020 [164]    | RCT           | NR                                                                                     | <p>51 patients:</p> <p>-Fast-track group (n=25, mean age 55±18, 44% females);</p> <p>-Non-fast-track group (n=26, mean age 54±13, 69.2% females)</p>                              | Primary one- or two-level lumbar fusion                                                                     | 56 days                | ↑ QoR40 scores (day 3) and ↓ LOS, oral intake time, patient-controlled analgesia time, opioid use (day 1) and C-reactive protein (day 3) in fast-track group vs. non-fast-track group                                                                                                                           |
| Staartjes et al. 2019 [166] | Prospective   | Lumbar disc herniation, spinal stenosis, spondylolisthesis, facet cysts, or proven DDD | Fast-track group: 2579 patients, mean age 48.5±13.5, 45.9% females                                                                                                                | Tubular microdiscectomy, single-level robot-guided PLIF or TLIF, mini-open ALIF, or mini-open decompression | 6 weeks, 1 and 2 years | LOS=1.1±1.2 days; 30-day readmissions=20 (0.8%) and 60-day readmissions=36 (1.4%); discharge after 1-night=94% patients. Over the 5-year period: ↑ %patients discharge after 1-night, and ↓ adverse events. For fusion procedures: ↑ 1-night hospital stays rate (from 26% to 85%) and ↓ LOS (from 2.4±1.2 days |

|                           |               |                                                                               |                                                                                                                                                   |                                                                                  |         |                                                                                                                                                                                                                                                                                       |
|---------------------------|---------------|-------------------------------------------------------------------------------|---------------------------------------------------------------------------------------------------------------------------------------------------|----------------------------------------------------------------------------------|---------|---------------------------------------------------------------------------------------------------------------------------------------------------------------------------------------------------------------------------------------------------------------------------------------|
|                           |               |                                                                               |                                                                                                                                                   |                                                                                  |         | to 1.5±0.3 days), nursing costs (of 46.8%)                                                                                                                                                                                                                                            |
| Venkata et al. 2018 [178] | Prospective   | Degenerative lumbar and cervical spinal conditions causing neural compression | Fast-track group: 237 patients (mean age 57, 40% females)                                                                                         | Non-instrumented lumbar and cervical spinal decompression and discectomy surgery | 1 year  | ↓LOS: short stay=12 patients (5%), ambulatory=225 (95%) and day surgery after admission=126 (53.2%); readmissions=7 (2.5%)                                                                                                                                                            |
| Wang et al. 2020 [180]    | Retrospective | Lumbar disk herniation or spinal stenosis                                     | 190 patients:<br>-Fast-track group (n=95, mean age 72.39±6.12, 52.6% females);<br><br>-Non-fast-track, (n=95, mean age 70.81±6.27, 57.8% females) | Lumbar fusion surgery                                                            | 30 days | ↓LOS (12.30±3.03 vs. 15.50±1.88) in fast-track group vs. non-fast-track group                                                                                                                                                                                                         |
| Yang et al. 2020 [187]    | Prospective   | AIS                                                                           | Fast-track group: 46 patients (mean age 14.3, 89.1% female)                                                                                       | PSF                                                                              | 15 days | LOS=3.3 days: discharge day 2=1 patient, day 3=33, day 4=9, day 5=3. 80% of patients felt that they were discharged at an appropriate time while 20% felt they were discharged too early. ↑mean FACES pain scores in patients who felt they were discharged early than those who felt |

|  |  |  |  |  |  |                                    |
|--|--|--|--|--|--|------------------------------------|
|  |  |  |  |  |  | they were discharged appropriately |
|--|--|--|--|--|--|------------------------------------|

**Abbreviations:** n = number; ↓ = decrease; vs. = versus; NR = not reported; LOS = hospital length of stay; ILOS = intensive care unit length of stay; ICU = intensive care unit; ALIF = anterior lumbar interbody fusion; ACDF = anterior cervical discectomy and fusion; TLIF = transforaminal lumbar interbody fusion; MIS = minimally invasive surgery; NMS = neuromuscular scoliosis; PSF = Posterior spinal fusion; AIS = adolescent idiopathic scoliosis; h = hours; TXA = tranexamic acid; ↑ = increase; VAS = visual analog scale; EBL = estimated blood loss; CDA = cervical disc arthroplasty; OFA = Opioid-free anesthesia; OCA = opioid-containing anesthesia; OMEs = oral morphine equivalents; RCT = randomized controlled trial; QoR40 = Quality of Recovery 40; DDD = degenerative disc disease;. PLIF = posterior lumbar interbody fusion.

**Table S4.** Basic characteristics of included literatures studies on thorax orthopedic surgery.

| References               | Study design  | Pathological condition     | Patients number, age (years) and gender (%)                                                                                                                                     | Surgical procedure                                       | Follow-up | Outcomes/Endpoints                                                                                                                                                                       |
|--------------------------|---------------|----------------------------|---------------------------------------------------------------------------------------------------------------------------------------------------------------------------------|----------------------------------------------------------|-----------|------------------------------------------------------------------------------------------------------------------------------------------------------------------------------------------|
| Holmes et al. 2019 [90]  | Retrospective | PE                         | 436 patients:<br><br>-Fast-track group (n=186, mean age 15.3±2.3);<br><br>-Transition group (n=104, mean age 15.5±1.9);<br><br>-Non-fast-track group (n=146, mean age 14.2±3.3) | MIRPE                                                    | NR        | ↓Opioid use (0.5±0.2 vs. 0.7±0.4 vs. 0.7±0.8 MEDD/kg), LOS (3 vs. 4 vs. 5 days), first ambulation and catheter removal time in fast-track group vs. transition and non-fast-track groups |
| Mangat et al. 2020 [130] | Retrospective | Pediatric pectus deformity | 55 patients:<br><br>-Fast-track group (n=38, mean age 16, 21% females);                                                                                                         | Minimally invasive and traditional corrective procedures | 30 days   | ↓Pain score, operative time, opioid use, pruritus in fast-track group vs. non-fast-track group                                                                                           |

|                                      |               |                                                           |                                                                                          |                                                                              |         |                                                                                                                              |
|--------------------------------------|---------------|-----------------------------------------------------------|------------------------------------------------------------------------------------------|------------------------------------------------------------------------------|---------|------------------------------------------------------------------------------------------------------------------------------|
|                                      |               |                                                           | -Non-fast-track group<br>(n=17, mean age 15,<br>23.5% females)                           |                                                                              |         |                                                                                                                              |
| Pirsaharkhiz<br>et al. 2020<br>[146] | Retrospective | Blunt thoracic<br>trauma<br>resulting in rib<br>fractures | 42 patients (mean age<br>59, 35.5% females)                                              | Urgent or<br>elective<br>thoracic<br>surgical<br>procedure with<br>ESP block | NR      | Block effective in 83.3%<br>of patients, no mortality<br>or complications                                                    |
| Wharton et<br>al. 2020<br>[181]      | Retrospective | PE                                                        | 109 patients:<br><br>-Fast-track group<br>(n=58);<br><br>-Non fast-track group<br>(n=51) | Nuss<br>procedure for<br>surgical<br>correction                              | 3 weeks | ↓LOS (2.90 vs. 3.49),<br>urinary catheter use and<br>pain scores (day 0) in<br>fast-track group vs. non-<br>fast-track group |

**Abbreviations:** PE = pectus excavatum; n = number; MIRPE = minimally invasive repair of pectus excavatum; NR = not reported; ↓ = decrease; vs. = versus; MEDD = Morphine Equivalent Daily Dose; LOS = hospital length of stay; ESP = erector spinae plane.

**Table S5.** Basic characteristics of included literatures studies on elbow orthopedic surgery.

| References              | Study design | Pathological condition        | Patients number, age (years) and gender (%)                                                                                               | Surgical procedure  | Follow-up                         | Outcomes/Endpoints                                                                                    |
|-------------------------|--------------|-------------------------------|-------------------------------------------------------------------------------------------------------------------------------------------|---------------------|-----------------------------------|-------------------------------------------------------------------------------------------------------|
| Cui et al.<br>2019 [48] | RCT          | Post-traumatic<br>stiff elbow | 50 patients:<br><br>-Fast-track group<br>(n=25, mean age<br>36.68±10.63, 28%<br>females);<br><br>-Non-fast-track group<br>(n=25, mean age | Open<br>arthrolysis | 1-5 days, 6<br>weeks, 6<br>months | ↓VAS pain score (1-5<br>days), drain time and<br>↑ROM in fast-track group<br>vs. non-fast-track group |

|                         |               |                          |                                                                                                                                                                                                                                                          |     |                |                                                                                                                                            |
|-------------------------|---------------|--------------------------|----------------------------------------------------------------------------------------------------------------------------------------------------------------------------------------------------------------------------------------------------------|-----|----------------|--------------------------------------------------------------------------------------------------------------------------------------------|
|                         |               |                          | 40.88±11.95, 40% females)                                                                                                                                                                                                                                |     |                |                                                                                                                                            |
| Prkić et al. 2020 [152] | Retrospective | Primary and secondary OA | 126 patients:<br>-Fast-track + casting group (n=70, mean age 69±7.8, 85.7% females);<br><br>-Fast-track + non-casting group (n=31, mean age 70±6.6, 80.6% females);<br><br>-Fast-track + functional discharge group (n=25, mean age 71±8.3, 92% females) | TEA | Mean 45 months | ↓LOS (5.4 vs. 6.2 days) in non-casting group vs. casting group, and (3.8 vs. 6.0 days) in functional discharge group vs. non-casting group |

**Abbreviations:** RCT = randomized controlled trial; n = number; ↓ = decrease; VAS = visual analog scale; ↑ = increase; ROM = range of motion; vs. = versus; OA = osteoarthritis; TEA = total elbow arthroplasty; LOS = hospital length of stay.

**Table S6.** Basic characteristics of included literatures studies on hip and/or knee orthopedic surgery.

| References               | Study design | Pathological condition | Patients number, age (years) and gender (%)                | Surgical procedure | Follow-up | Outcomes/Endpoints                                                                       |
|--------------------------|--------------|------------------------|------------------------------------------------------------|--------------------|-----------|------------------------------------------------------------------------------------------|
| <i>Knee</i>              |              |                        |                                                            |                    |           |                                                                                          |
| Aasvang et al. 2016 [25] | Prospective  | OA                     | 115 patients:<br><br>-Fast-track + non-opioid group (n=57, | Unilateral TKA     | 6 days    | ↑Postoperative pain (at rest and walk), opioid use in opioid groups vs. non-opioid group |

|                          |               |    |                                                                                                                                                                                                                                                                  |     |           |                                                                                                                                                                                                                            |
|--------------------------|---------------|----|------------------------------------------------------------------------------------------------------------------------------------------------------------------------------------------------------------------------------------------------------------------|-----|-----------|----------------------------------------------------------------------------------------------------------------------------------------------------------------------------------------------------------------------------|
|                          |               |    | <p>mean age 65, 66% females);</p> <p>-Fast-track + low dose opioid group (&lt;30 mg/day morphine equivalents, n=35, mean age 70, 80% females);</p> <p>-Fast-track + high dose opioid group (≥30 mg/day morphine equivalents, n=23, mean age 65, 48% females)</p> |     |           |                                                                                                                                                                                                                            |
| Ascione et al. 2020 [30] | Prospective   | NR | 481 patients (704 TKA, mean age 69.8, 62.3% females)                                                                                                                                                                                                             | TKA | 12 months | <p>LOS=2.3 days. 88.5% patients (n=623) satisfied, 2.1% (n=15) dissatisfied.</p> <p>Complications=15 (2%: 5 painful knees, 3 knee stiffness, 3 hematomas, 2 infections, 1 DVT); readmission=1; operative time=40.7 min</p> |
| Auyong et al. 2015 [31]  | Retrospective | NR | <p>252 patients:</p> <p>-Fast-track group (n=126, mean age 66.02±10.02, 65% females);</p> <p>-Non-fast-track group (n=126, mean age</p>                                                                                                                          | TKA | 30 days   | <p>↓LOS (56.1 vs. 76.6 h), NRS pain score, opioid use (day 1 and 2), adverse events, need transfusions (21.4% vs. 7.9%), and ↑discharge (41% vs. 21%), distance ambulated (day 1 and 2) in fast-track</p>                  |

|                            |               |    |                                                                                                                                                                                                             |     |                 |                                                                                                                                                                                                                                                     |
|----------------------------|---------------|----|-------------------------------------------------------------------------------------------------------------------------------------------------------------------------------------------------------------|-----|-----------------|-----------------------------------------------------------------------------------------------------------------------------------------------------------------------------------------------------------------------------------------------------|
|                            |               |    | 68.44±9.98, 67.4% females)                                                                                                                                                                                  |     |                 | group vs. non-fast-track group                                                                                                                                                                                                                      |
| Bandholm et al. 2014 [33]  | Retrospective | NR | 15 patients (mean age 72.0±10.1, 73.3% females)                                                                                                                                                             | TKA | NR              | ↑Pain with increasing load, and repetitions to contraction failure                                                                                                                                                                                  |
| Cao et al. 2020 [42]       | RCT           | OA | 102 patients:<br><br>-Fast-track + full-course tourniquet group (n=51, mean age 64.9±7.5, 72.5% females);<br><br>-Fast-track + second half-course tourniquet group (n=51, mean age 65.2±6.4, 74.5% females) | TKA | 2 weeks         | ↓VAS, thigh circumference growth rate, swelling, TNF- $\alpha$ , PTX3, CCL2, PGE2, SOD-1, Mb, postoperative blood loss, drain volume, blood transfusion, LOS, and ↑ROM, intraoperative blood loss in second half-course group vs. full-course group |
| Castorina et al. 2018 [44] | Retrospective | OA | 132 patients:<br><br>-Fast-track group (n=95, mean age 71.10±7.77);<br><br>-Non-fast-track group (n=37, mean age 74.62±6.42)                                                                                | TKA | 3 weeks         | ↑ROM, MRC, and ↓VAS pain score in fast-track group vs. non-fast-track group                                                                                                                                                                         |
| Collett et al. 2021 [47]   | Retrospective | OA | 296 patients:<br><br>-Fast-track group (n=100, mean age 66.7, 4% female);                                                                                                                                   | TKA | Until discharge | ↓LOS (66.8 vs. 22.3 hours), ↓inpatient opioids (169.5 mg vs. 66.7 mg), ↓intraoperative opioids use (57.4 mg vs. 10.5 mg), ↓post-anesthesia opioid use (13.6 mg vs.                                                                                  |



|                          |               |    |                                                                                                                                                                                                                              |              |             |                                                                                                                                                                                                                                                                                                                                                        |
|--------------------------|---------------|----|------------------------------------------------------------------------------------------------------------------------------------------------------------------------------------------------------------------------------|--------------|-------------|--------------------------------------------------------------------------------------------------------------------------------------------------------------------------------------------------------------------------------------------------------------------------------------------------------------------------------------------------------|
|                          |               |    | -Non-fast-track group (n=196, mean age 68.2, 6.1% female)                                                                                                                                                                    |              |             | 1.3 mg) in fast-track group vs. non-fast-track group                                                                                                                                                                                                                                                                                                   |
| Concina et al. 2019 [46] | Retrospective | NR | <p>151 patients:</p> <p>-Fast-track + tourniquet and suction drain (n=51, mean age 73);</p> <p>-Fast-track + no tourniquet and no suction drain (n=50, mean age 70);</p> <p>-Fast-track + tourniquet (n=50, mean age 75)</p> | Primary TKR  | NR          | <p>↑Intraoperative blood loss in no tourniquet and no suction drain group vs. tourniquet and suction drain and tourniquet groups. ↓Hb in tourniquet and suction drain group vs. tourniquet group. ↑transfusion rate, pain and &gt;difficulties in reaching a 90 degrees of knee flexion in tourniquet and suction drain group vs. the other groups</p> |
| Deiter et al. 2020 [57]  | Retrospective | OA | <p>150 patients:</p> <p>-Fast-track + adductor canal block group (n=75, mean age 67.6±7.8, 49.3% females);</p> <p>-Fast-track (n=75, mean age 67.2±7.5, 49.3% females)</p>                                                   | Elective TKA | 12 and 24 h | <p>↓NRS pain scores (by 90% in PACU and 38% at 12 and 24 h), MME (by 51%) in fast-track + adductor canal block group vs. fast-track alone group</p>                                                                                                                                                                                                    |
| Didden et al. 2019 [60]  | Retrospective | OA | <p>170 patients:</p> <p>-Fast-track group (n=85, mean age 69.0, 52.9% females);</p>                                                                                                                                          | TKA          | NR          | <p>↑Functional recovery (4 vs. 2 days), and ↓LOS (4 vs. 7 days), readmissions in new fast-track group vs. non-fast-track group</p>                                                                                                                                                                                                                     |

|                             |               |    |                                                                                                                                                                                                                                                          |     |                                                 |                                                                                                                                                                               |
|-----------------------------|---------------|----|----------------------------------------------------------------------------------------------------------------------------------------------------------------------------------------------------------------------------------------------------------|-----|-------------------------------------------------|-------------------------------------------------------------------------------------------------------------------------------------------------------------------------------|
|                             |               |    | -Non-fast-track group<br>(n=85, mean age 69.0<br>age, 57.6% females)                                                                                                                                                                                     |     |                                                 |                                                                                                                                                                               |
| Drosos et al.<br>2016 [62]  | Prospective   | OA | 90 patients:<br><br>-Fast-track (n=30,<br>mean age 71.77±6.50,<br>80% females);<br><br>-Fast-track + IV TXA<br>group (n=30, mean<br>age 69.27±7.21, 80%<br>females);<br><br>-Fast-track + topical<br>TXA group (n=30,<br>71.10±6.32 age, 80%<br>females) | TKR | 1, 2, 4 and<br>30 days                          | ↓Blood loss (by 16.3%<br>and 21.9%), transfusion<br>rates (by 90% and 93%),<br>number of units in IV<br>TXA and topical TXA<br>groups vs. fast-track<br>without TXA group     |
| Dwyer et al.<br>2014 [65]   | Retrospective | NR | 112 patients:<br><br>-Fast-track group<br>(n=57, mean age 70,<br>70.1% females);<br><br>-Non-fast-track group<br>(n=55, mean age 73,<br>60% females)                                                                                                     | TKR | 3 weeks                                         | ↓LOS (by 29%) in fast-<br>track group vs. non-fast-<br>track group                                                                                                            |
| Fransen et al.<br>2018 [70] | RCT           | NR | 49 patients:<br><br>-Fast-track group<br>(n=25, mean age<br>64±9, 56% females);                                                                                                                                                                          | TKA | 1, 2, 6 and<br>12 weeks,<br>1, 2 and 5<br>years | ↓VAS pain scores, LOS,<br>and ↑TUG times,<br>mobility on functional<br>tests, operative time,<br>intraoperative blood loss<br>in fast-track group vs.<br>non-fast-track group |

|                            |               |    |                                                                                                                                                                                                            |               |                             |                                                                                                                                                                                    |
|----------------------------|---------------|----|------------------------------------------------------------------------------------------------------------------------------------------------------------------------------------------------------------|---------------|-----------------------------|------------------------------------------------------------------------------------------------------------------------------------------------------------------------------------|
|                            |               |    | -Non-fast-track group (n=24, mean age 61±7, 62.4% females)                                                                                                                                                 |               |                             |                                                                                                                                                                                    |
| Gromov et al. 2019 [79]    | RCT           | OA | 29 patients (mean age 64, 62% females):<br><br>-Fast-track group + standard three-layer closure with staples + tissue adhesive group;<br><br>-Fast-track + standard three-layer closure with staples group | Bilateral TKA | 72 h, 3 weeks, and 3 months | ↓Dressing changes in knees with tissue adhesive. ↑no dressing changes before discharge (59% vs. 24%) in knee treated with tissue adhesive vs. knee treated without tissue adhesive |
| Gromov et al. 2020 [80]    | Prospective   | NR | Fast-track group: 3,927 patients (mean age 66.2, 53.9% females)                                                                                                                                            | UKA           | 30 and 90 days              | LOS=1.3 days. 30- and 90-day readmission rate=4.2% and 6.9%. 90-day mortality=0.08%                                                                                                |
| Higgins et al. 2020 [88]   | Retrospective | OA | 1256 patients:<br><br>-Fast-track + PES (n=473, mean age 67.8, 54.4% females);<br><br>-Fast-track group (n=783, mean age 69.4, 59.6% females)                                                              | TKA           | 30 and 60 days              | ↓LOS (5.2 days versus 6.6 days), ↓rate of reoperation within 60 days (2.2% vs 5.0%) and ↑PROMs in PES patients                                                                     |
| Hoornjtje et al. 2017 [91] | Retrospective | OA | 40 patients:<br><br>-Fast-track (n=20, mean age 63.8±7.5, 65% females);                                                                                                                                    | UKA           | 3 months                    | ↓HADS (3 vs. 8) and ↑NRS in (8 vs. 5) in non-fast-track patients                                                                                                                   |

|                             |               |    |                                                                 |                |          |                                                                                                                                                                                                                                                                                                                           |
|-----------------------------|---------------|----|-----------------------------------------------------------------|----------------|----------|---------------------------------------------------------------------------------------------------------------------------------------------------------------------------------------------------------------------------------------------------------------------------------------------------------------------------|
|                             |               |    | -Non-fast-track<br>(n=20, mean age<br>62.2±5.5, 50%<br>females) |                |          |                                                                                                                                                                                                                                                                                                                           |
| Husted et al.<br>2011a [93] | Prospective   | OA | Fast-track patients<br>(n=29, median age 67,<br>55.1% females)  | Revision TKA   | 3 months | LOS=(1-4) days;<br>perioperative<br>complications: one<br>anesthesia-related<br>complication, n=7<br>cortical cracks/fractures,<br>n=1 fractures lines at both<br>stem ends; blood<br>transfusion: n=8, patient<br>satisfaction (verbal<br>analog scale 0-10): 10 (8-<br>10), readmission n=3                             |
| Jensen et al.<br>2020 [98]  | Prospective   | OA | Fast-track group: 100<br>patients (mean age 67,<br>57% females) | UKA            | NR       | Median LOS: 1 day<br>(range 0-3); discharge:<br>22% on DOS; 78% on<br>day 1; 98% on day 2; lack<br>of mobilization and pain<br>separately delayed<br>discharge in respectively<br>78% and 24% of patients<br>on DOS. Main reasons<br>for lack of mobilization:<br>motor blockade (37%)<br>and logistical factors<br>(26%) |
| Jensen et al.<br>2021 [99]  | Retrospective | OA | Fast-track:                                                     | UKA and<br>TKA | 90 days  | ↓Median LOS in UKA<br>than UKA (1 vs. 2 days),<br>↑DOS discharge of UKA<br>(21.1% vs. 0.5%),                                                                                                                                                                                                                              |

|                           |               |    |                                                                                                                                                          |     |                                   |                                                                                                                                                                            |
|---------------------------|---------------|----|----------------------------------------------------------------------------------------------------------------------------------------------------------|-----|-----------------------------------|----------------------------------------------------------------------------------------------------------------------------------------------------------------------------|
|                           |               |    | -UKA (n=2,786 mean age 66.0, 53.7% female);<br><br>-TKA (n=7,708, mean age 66.5, 54.5% female)                                                           |     |                                   | ↓prosthetic joint infection and reoperations in UKA,<br>↑aseptic revisions in UKA                                                                                          |
| Jiang et al. 2019 [100]   | Prospective   | OA | 256 patients:<br><br>-Fast-track group (n=106, mean age 74.2±6.3, 54.7% females);<br><br>-Non-fast-track group (n=141, mean age 75.4±5.9, 58.8% females) | TKA | 1, 3 and 5 days, 1 month, 2 years | VAS: ↓fast-track group at day 1 and day 5; clinical outcomes: ↓fast-track intraoperative blood loss, total blood loss, transfusion rate                                    |
| Klement et al. 2019 [109] | Retrospective | OA | 264 patients (mean age 66.2±9.4, 56.4% females):<br><br>-Fast-track + FNB + LB-PAI group (n=146);<br><br>-Fast-track + ACC + iPACK group (n=118)         | TKA | 15 months                         | ACC + iPACK group:<br>↓median LOS (2.0 vs. 3.0 days); ↓median IV ME 24 h postoperatively;<br>↑discharge to home;<br>↓opioid consumption;<br>↓opioid related adverse events |
| Lamplot et al. 2014 [114] | RCT           | OA | 36 patients:<br><br>-Fast-track + multimodal analgesics group                                                                                            | TKA | 3 weeks                           | ↓VAS pain score at rest and during physical therapy in multimodal group; ↓total narcotic consumption, daily narcotic consumption,                                          |

|                                   |             |    |                                                                                                                                                                                                  |            |                 |                                                                                                                                                                                                                                                         |
|-----------------------------------|-------------|----|--------------------------------------------------------------------------------------------------------------------------------------------------------------------------------------------------|------------|-----------------|---------------------------------------------------------------------------------------------------------------------------------------------------------------------------------------------------------------------------------------------------------|
|                                   |             |    | (n=19, mean age 66.9, 57.8% females);<br><br>-Fast-track + PCA group (n=17, mean age 62.1, 41.1% females)                                                                                        |            |                 | narcotic-related adverse events, and time to physical therapy milestones in the multimodal group; ↑satisfaction score in multimodal group                                                                                                               |
| Larsen et al. 2012 [115]          | Prospective | OA | Fast-track group: 211 patients (mean age 67, 51% females)                                                                                                                                        | TKA or UKA | 4 and 12 months | Average LOS: 3.9 days; ↑HRQOL in comparison to the background population norm at 4 months; ↓SF36 at 4 months and 12 months vs. background population                                                                                                    |
| Li et al. 2021b [122]             | Prospective | OA | 86 patients:<br><br>-Fast-track nursing group (n=43, mean age 67.3±5.2, 34.8% females);<br><br>-Fast-track nursing + limb rehabilitation training group (n=43, mean age 68.1±5.2, 41.8% females) | TKA        | 30 days         | ↑Knee joint function, limb motor ability and neurological function, increase patients' cognition of disease and reduce the incidence of complications in fast-track nursing + limb rehabilitation training group compared with fast-track nursing group |
| Lindberg-Larsen et al. 2017 [123] | RCT         | OA | 73 patients:<br><br>-Fast-track + MP group (n=33, 65 age, 61% females);<br><br>-Fast-track + isotonic saline group (n=30,                                                                        | TKA        | Until discharge | ↓Circulating markers of endothelial activation and damage and systemic inflammatory response (C-reactive protein) in fast-track + MP group                                                                                                              |

|                                    |               |    |                                                                                                                                                                                                     |               |                 |                                                                                                                                                                                                                                                       |
|------------------------------------|---------------|----|-----------------------------------------------------------------------------------------------------------------------------------------------------------------------------------------------------|---------------|-----------------|-------------------------------------------------------------------------------------------------------------------------------------------------------------------------------------------------------------------------------------------------------|
|                                    |               |    | 67.7 age, 50% females)                                                                                                                                                                              |               |                 |                                                                                                                                                                                                                                                       |
| Lindberg-Larsen et al. 2018a [124] | RCT           | OA | 69 patients:<br><br>-Fast-track + MP group (n=33, 65 age, 61% females);<br><br>-Fast-track + isotonic saline group (n=30, 67.7 age, 50% females)                                                    | TKA           | Until discharge | No differences in orthostatic hypotension and intolerance between groups. ↓C-reactive protein in fast-track + MP group                                                                                                                                |
| Lindberg-Larsen et al. 2018b [125] | RCT           | OA | 122 patients:<br><br>-Fast-track + MP group (n=62, 65 age, 52% females);<br><br>-Fast-track + isotonic saline group (n=60, 67.4 age, 55% females)                                                   | TKA           | 48 h            | ↑Plasma glucose and insulin resistance and impaired insulin secretion in response to hyperglycemia in fast-track + MP group                                                                                                                           |
| Lindberg-Larsen et al. 2019 [126]  | Retrospective | OA | 464 patients:<br><br>-Fast-track + simultaneous bilateral TKA group (performed under same anesthesia, n=232, 64.6 age, 53.4% females);<br><br>-Fast-track + bilateral TKA group (performed with 1–6 | Bilateral TKA | 1 months        | LOS=4 days, in-hospital complication rate=15.5% in simultaneous group vs. 7.3% in bilateral group; 0.9% venous thromboembolic events in each group, re-operated=3.4% after simultaneous vs. 0.4% after bilateral TKA; 30-day readmission rate=8.6% in |

|                               |               |                                   |                                                                                                                                                |     |              |                                                                                                                                                                                                                                                                                                      |
|-------------------------------|---------------|-----------------------------------|------------------------------------------------------------------------------------------------------------------------------------------------|-----|--------------|------------------------------------------------------------------------------------------------------------------------------------------------------------------------------------------------------------------------------------------------------------------------------------------------------|
|                               |               |                                   | months, n=232, 65 age, 53% females)                                                                                                            |     |              | simultaneous vs. 5.6% in bilateral group                                                                                                                                                                                                                                                             |
| Maempel et al. 2015 [129]     | Prospective   | OA                                | 165 patients:<br><br>-Fast-track group (n=84, 69.8 age, 50% females);<br><br>-Non-fast-track group (n=81, 70.1 age, 54.3% females)             | TKA | 1 years      | LOS=3 days in fast-track and 4 in non-fast-track                                                                                                                                                                                                                                                     |
| McDonald et al. 2012 [131]    | Prospective   | OA                                | 1816 patients:<br><br>-Fast-track group (n=1081, mean age 69, 59.3% females);<br><br>-Non-fast-track group (n=735, mean age 70, 58.2% females) | TKA | 1 years      | ↓Median LOS in fast-track from 6 to 4 days; ↓post-operative urinary catheterization (35% vs. 6.9%) and blood transfusion rates (3.7% vs. 0.6%) in fast-track group. Median pain scores on mobilization three throughout hospital stay with 95% of patients ambulating within 24 h in fast-tack group |
| Munk et al. 2012 [134]        | Prospective   | OA                                | Fast-track group: 35 patients (mean age 66, 48.5% females)                                                                                     | UKA | 4 weeks      | Preoperative level of leg-extension power and functional performance after 1 month                                                                                                                                                                                                                   |
| Nicolaiciuc et al. 2019 [136] | Retrospective | Primary or secondary gonarthrosis | 108 patients:<br><br>-Fast-track + tournique group (n=53);                                                                                     | TKA | 2 and 6 days | ↓Pain, oxycodone use, and ↑non-opioids use in fast-track without tournique group vs. fast-                                                                                                                                                                                                           |



|                                   |               |    |                                                                                                                                                                                                                                          |     |                  |                                                                                                                                                                                    |
|-----------------------------------|---------------|----|------------------------------------------------------------------------------------------------------------------------------------------------------------------------------------------------------------------------------------------|-----|------------------|------------------------------------------------------------------------------------------------------------------------------------------------------------------------------------|
|                                   |               |    | -Fast-track without<br>tournique group<br>(n=55)                                                                                                                                                                                         |     |                  | track with tournique<br>group                                                                                                                                                      |
| Noel et al.<br>2020 [137]         | RCT           | OA | 69 patients:<br><br>-Fast-track + oral<br>oxycodone extended-<br>release group (n=34,<br>67.6±8.2 age, 61.7%<br>females);<br><br>-Fast-track + oral<br>oxycodone<br>immediate-release<br>group (n=35,<br>65.3±9.0 age, 57.1%<br>females) | TKA | 2 days           | =Pain and first<br>mobilization                                                                                                                                                    |
| Pamilo et al.<br>2018 [140]       | Retrospective | OA | 4256 patients:<br><br>-Fast-track group<br>(n=1061);<br><br>-Non-fast-track group<br>(n=3195)                                                                                                                                            | TKA | 2 and 5<br>years | ↓Median LOS from 5 to 3<br>days and LUIC from 7 to<br>3 days in fast-track group;<br>↑in discharge rate to<br>home in fast-track group                                             |
| Petersen et<br>al. 2020b<br>[144] | Prospective   | OA | Fast-track group:<br>1810 patients (mean<br>age 66.2, 53.9%<br>females)                                                                                                                                                                  | UKA | 90 days          | Median LOS 1 day; 7.5%<br>with LOS >2 days. 90-<br>day incidence of<br>VTE=16. 5 pulmonary<br>embolisms, 11 deep-vein<br>thrombosis after median<br>18 days. 90-day<br>mortality=3 |

|                          |               |    |                                                                                                                                                               |     |                 |                                                                                                                                                                                                                                                                                                                                    |
|--------------------------|---------------|----|---------------------------------------------------------------------------------------------------------------------------------------------------------------|-----|-----------------|------------------------------------------------------------------------------------------------------------------------------------------------------------------------------------------------------------------------------------------------------------------------------------------------------------------------------------|
| Plessl et al. 2020 [149] | Retrospective | OA | 323 patients (mean age 65.7, 63.6% females):<br><br>-Fast-track group (n=194);<br><br>-Non-fast-track group (n=129)                                           | TKA | 1 years         | Mean LOS for the fast-track and non-fast-track groups 0.8 and 2.5 days; fast-track associated with ↑flexion at 2, 6, and 12 weeks and a ↑probability of attaining flexion $\geq 120^\circ$ at 6 and 12 weeks; fast-track ↓severe flexion contracture and ↓probability of flexion contracture $\geq 10^\circ$ at 2, 6, and 12 weeks |
| Ruiz et al. 2018 [155]   | Prospective   | OA | Fast-track group: 50 patients (mean age 66.7, 44% females)                                                                                                    | UKA | 30 days         | 94% patients discharged the day of surgery; at 30 days: 80% of patients very satisfied, 10% satisfied and 4% not satisfied                                                                                                                                                                                                         |
| Rytter et al. 2017 [156] | Prospective   | OA | 72 patients (mean age 65.5, 58.8% females):<br><br>-Fast-track group (n=37);<br><br>-Fast-track + single preoperative dose of systemic MP 125 mg group (n=35) | UKA | 4 months        | ↓Pain at rest and during walking, ↓opioids consumption, ↑knee extension in fast-track + MP group                                                                                                                                                                                                                                   |
| Saku et al. 2019 [157]   | Prospective   | OA | Fast-track group (n=849, mean age 67.7, 68% females)                                                                                                          | TKA | Until discharge | Median LOS: 3 days; risk factors for delayed discharge: age, ↑American Society of Anesthesiologists score,                                                                                                                                                                                                                         |

|                                |             |    |                                                                                                                                                                     |               |              |                                                                                                                                                                    |
|--------------------------------|-------------|----|---------------------------------------------------------------------------------------------------------------------------------------------------------------------|---------------|--------------|--------------------------------------------------------------------------------------------------------------------------------------------------------------------|
|                                |             |    |                                                                                                                                                                     |               |              | general anesthesia, surgery performed toward the end of the week, ↑duration of surgery, ↑stay in the post-anesthesia care unit, and ↓preoperative walking distance |
| Schotanus et al. 2017 [159]    | Prospective | OA | 20 patients (mean age 65, 35% females):<br><br>-Fast-track group (n=10);<br><br>-Fast-track + OS pathways (n=10)                                                    | TKA           | 6 weeks      | Similar early physical activity parameters in fast-track patients and fast-track + OS                                                                              |
| Skovgaard et al. 2013 [161]    | RCT         | OA | 24 patients (mean age, 65, 35% females):<br><br>-Fast-track + saline sprayed in knee joint (n=14);<br><br>-Fast-track + fibrin sealant sprayed in knee joint (n=10) | Bilateral TKA | 7 days       | Median LOS: 3 days; no difference between groups in term of output from drains, swelling, strength, pain                                                           |
| van den Belt et al. 2015 [174] | Prospective | OA | Fast-track group: 240 patients (mean age 64.1, 59.6% females)                                                                                                       | TKA           | At discharge | Median LOS: 5 days; wound, exudate and range of motion at the day of surgery: predictive factors for LOS in fast-track procedures                                  |

|                              |             |    |                                                                                                                                                                                                                                                                                                                                                                                                                   |     |                 |                                                                                                                                                                                                                    |
|------------------------------|-------------|----|-------------------------------------------------------------------------------------------------------------------------------------------------------------------------------------------------------------------------------------------------------------------------------------------------------------------------------------------------------------------------------------------------------------------|-----|-----------------|--------------------------------------------------------------------------------------------------------------------------------------------------------------------------------------------------------------------|
| Van Egmond et al. 2015 [175] | Prospective | OA | Fast-track group: 30 patients (mean age 68, 60% females)                                                                                                                                                                                                                                                                                                                                                          | TKA | 6 weeks         | ↓Pain and ↑quality of life and function during the 6 weeks after surgery. Mean h of weekly physiotherapy: 0.6 for the first week and 0.9 during the 6 weeks. Medical consultations in 9 patients during the 6-week |
| Wang et al. 2018a [21]       | RCT         | OA | <p>200 patients (mean age 68, 60% females):</p> <p>-Fast-track + single dose of 2.0 g of TXA orally 2 h pre-op (group A);</p> <p>-Fast-track + single dose of TXA followed by 1.0 g orally 3 h post-op (group B);</p> <p>-Fast-track + single dose of TXA followed by 1.0 g 3- and 9-h post-op (group C);</p> <p>-Fast-track + single dose of TXA followed by 1.0 g orally 3-, 9-, and 15-h post-op (group D)</p> | TKA | Until discharge | ↓Mean total blood loss in groups C and D vs. groups A and B; ↓mean hidden blood loss in groups B, C and D vs. in group A; ↓reduction in Hb level in groups C and D vs. in groups A and B                           |

|                        |     |    |                                                                                                                                                                                                                                                                                                                                                             |     |          |                                                                                                                                                                                                                                                                                                                                |
|------------------------|-----|----|-------------------------------------------------------------------------------------------------------------------------------------------------------------------------------------------------------------------------------------------------------------------------------------------------------------------------------------------------------------|-----|----------|--------------------------------------------------------------------------------------------------------------------------------------------------------------------------------------------------------------------------------------------------------------------------------------------------------------------------------|
| Wang et al. 2018b [22] | RCT | OA | <p>147 patients:</p> <p>-Fast-track + 3 oral dose TXA (2 g of TXA 2 h before incision, and 1 g of TXA 6 and 12 h after surgery) group (n=74, mean age 65±13.1, 78.37% females);</p> <p>-Fast-track + IA TXA (3 g of TXA in 100 mL of saline solution) (n=73, mean age 63.6±11.5 76.71% females)</p>                                                         | TKA | 3 months | Mean total blood loss: 788.8 mL in the oral TXA group vs. 872.4 mL in the IA TXA group; transfusion rates: 4% in oral group and 5% IA group                                                                                                                                                                                    |
| Wang et al. 2019 [23]  | RCT | OA | <p>118 patients:</p> <p>-Fast-track + IV TXA at 20-mg/kg 10 min before the surgery and 3 h post-op, and then oral 1 g TXA from post-op day 1 to 14 (group A) (n=59, mean age 63±13.9, 75% females);</p> <p>-Fast-track + IV TXA at 20-mg/kg 10 min before surgery and 3 h post-op, and then oral 1 g placebo from day 1 to 14 (group B) (n=59, mean age</p> | TKA | 3 months | <p>↓Mean total blood loss in Group A vs. in Group B;</p> <p>↑Hb in Group A vs. Group B on day.</p> <p>↓ecchymosis, morbidity, smaller ecchymosis area in Group A vs. Group B;</p> <p>↓blood coagulation level in Group A vs. in Group B on day 1 and day 3;</p> <p>↓swelling in Group A vs. in Group B on day 3 and day 14</p> |

|                                |               |    |                                                                                                                                                                                                      |     |                 |                                                                                                                                                                              |
|--------------------------------|---------------|----|------------------------------------------------------------------------------------------------------------------------------------------------------------------------------------------------------|-----|-----------------|------------------------------------------------------------------------------------------------------------------------------------------------------------------------------|
|                                |               |    | 63±13.9, 81.03% females)                                                                                                                                                                             |     |                 |                                                                                                                                                                              |
| Wied et al. 2015 [182]         | Retrospective | OA | <p>359 patients:</p> <p>-Fast-track + manipulation under anesthesia (n=21, mean age 64, 33.3% females);</p> <p>-Fast-track + non-manipulation under anesthesia (n=338, mean age 69, 63% females)</p> | TKA | 3 months        | Median LOS: 2 days; prevalence of knee manipulation significantly associated with the achieved knee flexion at discharge                                                     |
| Wynell-Mayow et al. 2018 [184] | Retrospective | OA | Fast-track group: 123 patients (mean age 70, 68% females)                                                                                                                                            | TKA | NR              | Median LOS: 5 days; median tourniquet time overall: 74 min and ↓year-on-year from 108 to 60. ↑tourniquet time not associated with ↑LOS, with ↑opioid and other complications |
| Yu et al. 2018 [189]           | RCT           | OA | <p>88 patients (mean age 69, 77.27% females):</p> <p>-Fast-track + compression therapy group (n=44);</p> <p>-Fast-track + no compression therapy group (n=44)</p>                                    | TKA | Until discharge | No differences in swelling, post-op blood loss, pain, range of motion, complications; ↑comfort ratings in non-compression group than compression group in the first 24 h     |

|                          |             |    |                                                                                                                                                                                                          |                |                   |                                                                                                                                                                                                                                                                                                                                                                            |
|--------------------------|-------------|----|----------------------------------------------------------------------------------------------------------------------------------------------------------------------------------------------------------|----------------|-------------------|----------------------------------------------------------------------------------------------------------------------------------------------------------------------------------------------------------------------------------------------------------------------------------------------------------------------------------------------------------------------------|
| Zietek et al. 2015 [191] | RCT         | OA | 62 patients:<br><br>-Fast-track standard rehabilitation program group (n=31, mean age 67.9, 64.5% females);<br><br>-Fast-track intensive rehabilitation program group (n=31, mean age 67.9, 58% females) | TKA            | 14 days           | ↓Pain; ↓pain while walking on the second post-op day from 6.1 to a mean of 4.9 in the intensive group and from 6.4 to 5.4 in the standard group; ↓pain at rest from 3.3 to 2.2 for the intensive group and from 4.0 to 3.0 for the standard group; pain at rest at 2 weeks: 2.8 in both groups, pain while walking: 3.0 for the intensive group and 3.4 for standard group |
| Zietek et al. 2016 [192] | Prospective | OA | Fast-track group (mean age 68.3, 86% females): 100 patients                                                                                                                                              | TKA            | 6 weeks           | Pre-op TNF- $\alpha$ inversely correlated with post-op pain scores during walking and with change of pain at rest during 6 weeks after surgery and directly correlated with a ↑post-op KSS                                                                                                                                                                                 |
| <i>Hip</i>               |             |    |                                                                                                                                                                                                          |                |                   |                                                                                                                                                                                                                                                                                                                                                                            |
| Bernaus et al. 2021 [37] | RCT         | OA | 63 patients (22.2% females):<br><br>-Fast-track + LIA group (mean age 56.31±9.79);                                                                                                                       | uncemented THA | 4, 8, 24 and 48 h | =VAS, analgesic rescue medication consumption (morphine), first sitting and ambulation time, Hb loss, complications, and LOS                                                                                                                                                                                                                                               |

|                             |               |           |                                                                                                                                                                      |     |                      |                                                                                                                                                                     |
|-----------------------------|---------------|-----------|----------------------------------------------------------------------------------------------------------------------------------------------------------------------|-----|----------------------|---------------------------------------------------------------------------------------------------------------------------------------------------------------------|
|                             |               |           | -Fast-track without LIA group (mean age 61.03±7.23)                                                                                                                  |     |                      |                                                                                                                                                                     |
| Berthelsen et al. 2017 [38] | RCT           | Arthritis | 29 patients:<br><br>-Fast-track group (n=15, mean age 71.53, 60% females);<br><br>-Non-fast-track group (n=14, mean age 75.21, 57.1% females)                        | THR | 2 weeks and 3 months | ↑Functional status, pain, depression and spouses' caregiver satisfaction in fast-track group vs. non-fast-track group                                               |
| Birznies et al. 2019 [39]   | Prospective   | NR        | 46 patients (58.6% females):<br><br>-Fast-track + prilocaine group (n=22, mean age 57.82±11.41);<br><br>-Fast-track + bupivacaine group (n=24, mean age 55.67±14.09) | THR | NR                   | ↓Pain during movement (3.33 vs. 2.00), LOS (~1 day) and ↑patient self-care (90.91% vs. 62.5%) in fast-track prilocaine group vs. fast-track + bupivacaine group     |
| D'Amato et al. 2019 [49]    | Retrospective | OA        | 211 patients (age range 60-80):<br><br>-Fast-track + tapentadol group (n=106);                                                                                       | THR | 1, 2, 3, 4 days      | ↓Pain (at rest and during movement), supplemental analgesia uses in tapentadol group vs. oxycodone/naloxone group; ↑adverse events (PONV, itching, constipation) in |



|                                         |               |                                             |                                                                                                                                                                                          |                   |                                            |                                                                                                                                                                 |
|-----------------------------------------|---------------|---------------------------------------------|------------------------------------------------------------------------------------------------------------------------------------------------------------------------------------------|-------------------|--------------------------------------------|-----------------------------------------------------------------------------------------------------------------------------------------------------------------|
|                                         |               |                                             | -Fast-track +<br>oxycodone/naloxone<br>group (n=105)                                                                                                                                     |                   |                                            | oxycodone/naloxone vs.<br>tapentadol group                                                                                                                      |
| Dawson-<br>Bowling et<br>al. 2014 [53]  | Retrospective | NR                                          | Fast-track group: 100<br>patients (mean age<br>65)                                                                                                                                       | Unilateral<br>THR | 6 weeks, 6<br>and 12<br>months, 3<br>years | LOS=1.99 days; 97%<br>patients satisfied;<br>complications n=7                                                                                                  |
| De<br>Ladoucette<br>et al. 2020<br>[54] | Prospective   | Non-traumatic<br>condition                  | 105,855 patients:<br><br>-Fast-track group<br>(n=1,110, mean age<br>67.5±11.9, 55%<br>females);<br><br>-Non-fast-track group<br>(n=104,745, mean age<br>69.3±11.6, 57, 54.9%<br>females) | Primary THA       | 90 days                                    | ↓LOS (3.3±2.9 vs.<br>7.5±5.3 days), 90-day<br>readmission (4% vs.<br>11%), and ↑discharge<br>(79% vs. 69%) in fast-<br>track group vs. non-fast-<br>track group |
| den Hartog<br>et al. 2017<br>[59]       | Retrospective | OA                                          | Fast-track group: 74<br>patients (mean age<br>67.1, 51.3% females)                                                                                                                       | THA               | NR                                         | LOS=1.8 days; pre-op<br>use of pain medication<br>and preoperative<br>neuropathic pain<br>associated with ↑post-op<br>pain                                      |
| den Hartog<br>et al. 2015<br>[58]       | Retrospective | NR                                          | Fast-track group: 477<br>patients (mean age<br>71.0, 66.4% females)                                                                                                                      | THA               | NR                                         | LOS=2.9 (≤2 nights in<br>266 patients, >2 nights in<br>211 patients); age, living<br>situation and approach<br>associated with ↑LOS                             |
| Ding et al.<br>2020 [61]                | Retrospective | Dysplasia,<br>osteonecrosis,<br>primary OA, | 311 patients:<br><br>-Fast-track with LOS<br>≤3 group (n=196,                                                                                                                            | THA               | 90 days                                    | ↑Post-op Hb and ↓costs in<br>LOS ≤3 group vs. LOS >3<br>group                                                                                                   |

|                            |             |                                                                                                           |                                                                                                                                                 |                        |                          |                                                                                                                                                                                 |
|----------------------------|-------------|-----------------------------------------------------------------------------------------------------------|-------------------------------------------------------------------------------------------------------------------------------------------------|------------------------|--------------------------|---------------------------------------------------------------------------------------------------------------------------------------------------------------------------------|
|                            |             | suppurative arthritis, rheumatoid arthritis, fracture, Legg-Calve-Perthes disease, ankylosing spondylitis | mean age 55.7±13.4, 45.9% females);<br><br>-Fast-track with LOS >3 group (n=115, mean age 53.6±16.2, 65.2% females)                             |                        |                          |                                                                                                                                                                                 |
| Dwyer et al. 2012 [64]     | Prospective | NR                                                                                                        | 127 patients:<br><br>-Fast-track group (n=64, mean age 70.5, 57.8% females);<br><br>-Non-fast-track group (n=63, mean age 72.5, 65.07% females) | THA                    | 1 and 3 weeks            | ↓LOS (5.3 vs. 8.3 days) in fast-track group vs. non-fast-track group                                                                                                            |
| Füssenich et al. 2020 [72] | Prospective | OA                                                                                                        | 360 patients:<br><br>-Fast-track group (n=185, mean age 68.5±9.9, 58.9% females);<br><br>-Control group (n=175, 66.9±8.1, 58.2% females)        | Primary THA            | 4 weeks, 6 and 12 months | ↓LOS (4.4 vs. 11.3 days), day hospitalization (4% vs. 98%), postoperative (21% vs. 92%) and inpatient (21% vs. 72%) rehabilitation in fast-track group vs. non-fast-track group |
| Gomez et al. 2019 [75]     | Prospective | Hip fractures                                                                                             | 54 patients:<br><br>-Fast-track group (n=27, mean age 84.5±8.7, 74% females);                                                                   | Intramedullary nailing | 1 year                   | ↓LOS (2.70±0.91 vs. 9.44±4.29 days), costs, operative time (32.90±24.1 vs. 55.10±38.7 h) in fast-                                                                               |

|                            |                                                 |               |                                                                                                                                                                     |                             |         |                                                                                                                                                                   |
|----------------------------|-------------------------------------------------|---------------|---------------------------------------------------------------------------------------------------------------------------------------------------------------------|-----------------------------|---------|-------------------------------------------------------------------------------------------------------------------------------------------------------------------|
|                            |                                                 |               | -Non-fast-track group<br>(n=27, mean age<br>85.0±8.5, 74%<br>females)                                                                                               |                             |         | track group vs. non-fast-track group                                                                                                                              |
| Gomez et al.<br>2020 [76]  | Prospective                                     | Hip fractures | 54 patients:<br><br>-Fast-track group<br>(n=27, mean age<br>84.5±8.7, 74%<br>females);<br><br>-Non-fast-track group<br>(n=27, mean age<br>85.0±8.5, 74%<br>females) | Intramedullary<br>nailing   | 1 year  | ↓Parker score, <loss of<br>walking autonomy,<br>without impact on<br>discharge destination or<br>walking aids, in fast-track<br>group vs. non-fast-track<br>group |
| Götz et al.<br>2021 [77]   | Retrospective                                   | NR            | Fast-track group: 102<br>patients (mean age<br>61.3±10.9, 34.3%<br>females)                                                                                         | THA                         | 4 weeks | ↓Pain, ↑ROM, HHS in<br>post-op vs. pre-op                                                                                                                         |
| Gromov et<br>al. 2015 [78] | Retrospective                                   | Dislocation   | 253 patients:<br><br>-Fast-track group<br>(n=188, mean age 78,<br>73.9% females);<br><br>-Non-fast-track group<br>(n=214, mean age 76,<br>68.2% females)            | THA and<br>hemiarthroplasty | NR      | ↓Surgical delay (2.5 vs.<br>4.1 h), LOS (26 vs. 31 h)<br>in fast-track group vs.<br>non-fast-track group                                                          |
| Gupta et al.<br>2014 [81]  | Prospective<br>with<br>retrospective<br>control | Fractures     | 494 patients:<br><br>-Fast-track group<br>(n=259, mean age 81,<br>74.9% females);                                                                                   | NR                          | NR      | ↓Time from emergency<br>department to ward (3.28<br>vs. 10.2 h), LOS (19.6 vs.<br>34 days), and ↑pre-op<br>geriatrician (76.1% vs.<br>4.2%) and falls (73.9%      |

|                          |               |           |                                                                                                                                                                                   |                          |                                            |                                                                                                                                                                                                                                              |
|--------------------------|---------------|-----------|-----------------------------------------------------------------------------------------------------------------------------------------------------------------------------------|--------------------------|--------------------------------------------|----------------------------------------------------------------------------------------------------------------------------------------------------------------------------------------------------------------------------------------------|
|                          |               |           | -Non-fast-track group (n=235, mean age 82, 71.9% females)                                                                                                                         |                          |                                            | vs. 5.1%) assessment in fast-track group vs. non-fast-track group                                                                                                                                                                            |
| Hansson et al. 2015 [83] | Retrospective | Fractures | 441 patients (mean age 84, 72.5% females)                                                                                                                                         | THA and hemiarthroplasty | 6 and 12 months                            | ↓Surgery time (62% vs. 78%, surgery within 24 h)                                                                                                                                                                                             |
| Hartog et al. 2015 [84]  | Prospective   | NR        | 27 patients (mean age 63, 55.5% females)                                                                                                                                          | THA                      | 3 months                                   | 88.8% of patients discharge on day of surgery. ↑PROMs, satisfaction, EQ-5D, and ↓NRS pain (from 6.6 to 1.9); no complications or reoperations                                                                                                |
| Herndon et al. 2020 [87] | Retrospective | NR        | 74 patients:<br><br>-Fast-track + chloroprocaine group (n=37, mean age 61.3±12.5, 67.5% females);<br><br>-Fast-track + bupivacaine group (n=37, mean age 60.7±9.2, 62.1% females) | THA                      | NR                                         | ↓LOS (0.9 vs. 1.2 days), operative time (68.2 vs. 83.6 min), EBL (184.7 vs. 218.9 mL), PACU LOS (139.4 vs. 194.9 min), intra-op hypotension (59.5% vs. 83.8%), and ↑discharge (100% vs. 89.2%) in chloroprocaine group vs. bupivacaine group |
| Huang et al. 2021 [92]   | Retrospective | Fracture  | Fast-track group: 1,138 patients (mean age 74.9±8.8, 76.7% females)                                                                                                               | THA bipolar HA           | Mean 21.2 months, and 3 months, 1, 2 and 3 | LOS=2.2 days; 92.4% discharged 48 h after surgery; blood transfusion rate=9.7%; complications=1.4%; readmission rate=1.05%                                                                                                                   |

|                            |               |          |                                                                                                                                                              |                              | years for<br>HHS |                                                                                                                                                                                                              |
|----------------------------|---------------|----------|--------------------------------------------------------------------------------------------------------------------------------------------------------------|------------------------------|------------------|--------------------------------------------------------------------------------------------------------------------------------------------------------------------------------------------------------------|
| Imbelloni et al. 2014 [96] | Prospective   | Fracture | 168 patients:<br><br>-Fast-track group (n=85, mean age 75.38±10.53, 70.5% females);<br><br>-Non-fast-track group (n=83, mean age 78.96±10.43, 63.8% females) | Corrective hip fracture      | 1 day            | ↓LOS (11.94±6.54 vs. 24.77±14.72), surgery suspension number (0.12±0.36 vs. 1.25±1.12), fasting time (2.48±0.26 vs. 13.38±2.02) in fast-track group vs. non-fast-track group                                 |
| Kang et al. 2019 [105]     | Retrospective | Fracture | 100 patients:<br><br>-Fast-track group (n=50, mean age 77.81±8.14, 70% females);<br><br>-Non-fast-track group (n=50, mean age 78.32±8.24, 68% females)       | PFNA intramedullary fixation | 3 and 6 months   | ↓LOS (from 8.21±0.83 to 5.82±0.64 days), opioid use, opioid-related adverse events, 30-day readmission rates in fast-track group vs. non-fast-track group                                                    |
| Klapwijk et al. 2017 [108] | Prospective   | NR       | Fast-track group: 94 patients (mean age 65, 59.5% females)                                                                                                   | THA                          | 6 weeks          | LOS=1 night. ↓NRS pain, ICOAP score, pain medication use, HOOS-PS (from 34 to 16), and ↑patients' resistance regarding LMWE injection, walking quality, OHS score (from 29 to 43), EQ-5D (from 0.69 to 0.78) |

|                             |               |           |                                                                                                                                                      |               |                       |                                                                                                                                                                                                                                       |
|-----------------------------|---------------|-----------|------------------------------------------------------------------------------------------------------------------------------------------------------|---------------|-----------------------|---------------------------------------------------------------------------------------------------------------------------------------------------------------------------------------------------------------------------------------|
| Kolodziej et al. 2020 [110] | Retrospective | NR        | Fast-track group: 30 patients (mean age 60.2, 10% females)                                                                                           | Bilateral THA | Mean 28 months        | LOS=4.5 days. ABT in 4 patients (13%)                                                                                                                                                                                                 |
| Larsson et al. 2016 [116]   | RCT           | Fracture  | 400 patients:<br><br>-Fast-track group (n=195, mean age 83, 67.6% females);<br><br>-Non-fast-track group (n=205, mean age 82, 65.8% females)         | NR            | 4 months              | LOS=between groups;<br>↓time from arrival to start for RX (28 vs. 145 min) in fast-track vs. non-fast-track group                                                                                                                     |
| Leiss et al. 2021 [117]     | Retrospective | NR        | Fast-track group: 109 patients (mean age 62.1±10.5, 35.7% females)                                                                                   | THA           | 4 weeks and 12 months | ↑HHS (39.0 vs. 21.5), EQ-5D-5L, EQ-VAS, PROMS, satisfaction, and ↓WOMAC, subscale pain (1.5±2.5 vs. 11.4±3.6), subscale stiffness (1.08±1.36 vs. 4.69±1.74), subscale physical function (5.2±8.2 vs. 35.8±12.3) in post-op vs. pre-op |
| Li et al. 2020b [120]       | Retrospective | Dysplasia | 168 patients:<br><br>-Fast-track group (n=86, mean age 4.0±1.3, 87.2% females);<br><br>-Non-fast-track group (n=82, mean age 4.2±1.3, 84.1% females) | Osteotomy     | 3 days                | ↓LOS (6.0±0.8 vs. 10.0±3.1 days), VAS score (2.9±0.8 vs. 4.0±0.8) in fast-track group vs. non-fast-track group                                                                                                                        |

|                             |             |          |                                                                                                                                                                                                                                                                 |                            |          |                                                                                                                                                                              |
|-----------------------------|-------------|----------|-----------------------------------------------------------------------------------------------------------------------------------------------------------------------------------------------------------------------------------------------------------------|----------------------------|----------|------------------------------------------------------------------------------------------------------------------------------------------------------------------------------|
| Mikkelsen et al. 2014 [133] | RCT         | OA       | <p>62 patients:</p> <p>-Fast-track + home based exercise 5 days/week and progressive resistance training 2 day/week group (n=32, mean age 64.8, 44% females);</p> <p>-Fast-track + home based exercise 7 days/week group (n=30, mean age 65.1, 40% females)</p> | THA                        | 10 weeks | ↑Maximal walking speed and stair climb performance in fast-track + home based exercise 5 days/week and progressive resistance training 2 days/week group vs. the other group |
| Okamoto et al. 2016 [138]   | RCT         | NR       | <p>126 patients:</p> <p>-Fast-track group (n=58, mean age 62.3±11.6, 38% females);</p> <p>-Non-fast-track group (n=68, mean age 62.3±15.2, 41% females)</p>                                                                                                     | THA                        | NR       | =LOS; ↑discharge time (63 vs. 70 h) in fast-track group vs. non-fast-track group                                                                                             |
| Otte et al. 2011 [139]      | Prospective | NR       | Fast-track group: 50 patients (mean age 56, 36% females)                                                                                                                                                                                                        | Simultaneous bilateral THA | 90 days  | LOS=4 days; mortality=4%, further operative procedure=8%, complication rate=22%                                                                                              |
| Pollmann et al. 2016 [150]  | Prospective | Fracture | 2,230 patients: (mean age 64.1±9.3, 63.6% females):                                                                                                                                                                                                             | THA                        | 30 days  | ↓Admission and surgery time, 30-day reoperation rate, composite 30-day                                                                                                       |

|                           |               |          |                                                                                                                                                             |                  |              |                                                                                                                                                                                                                                                                                   |
|---------------------------|---------------|----------|-------------------------------------------------------------------------------------------------------------------------------------------------------------|------------------|--------------|-----------------------------------------------------------------------------------------------------------------------------------------------------------------------------------------------------------------------------------------------------------------------------------|
|                           |               |          | -Fast-track group<br>(n=1,140);<br><br>-Non-fast-track group<br>(n=1,090)                                                                                   |                  |              | outcome (reoperation, surgical site infection and/or death) in fast-track group, but not after adjusting for age, gender, cognitive impairment and ASA score                                                                                                                      |
| Porsius et al. 2018 [151] | Prospective   | OA       | Fast-track group: 94 patients (mean age 65, 56% females)                                                                                                    | THA              | 45 days      | Fast (n=17), average (n=53), and slow (n=24) recovery subgroup. Subgroups differed on the estimated weekly growth rate during the first 2 weeks (fast: 9.5; average: 5.3; slow: 2.7), with < differences between groups in the last 4 weeks (fast: 0.90; average: 2.0; slow: 1.7) |
| Specht et al. 2011 [165]  | RCT           | OA       | 60 patients:<br><br>-Fast-track with LIA group (n=30, mean age 68, 60% females);<br><br>-Fast-track with LIA + LINFA group (n=30, mean age 64, 33% females) | THA              | 7 days       | =LOS, pain, tiredness, opioid consumption                                                                                                                                                                                                                                         |
| Talboy et al. 2016 [170]  | Retrospective | Fracture | 100 patients (mean age 83, 73% females):                                                                                                                    | Hemiarthroplasty | At discharge | ↓LOS (7 vs. 8.5 days), opiate consumption and PCA in fast-track group vs. non-fast-track group                                                                                                                                                                                    |



|                             |             |    |                                                                                                                                                                                                                                           |     |         |                                                                                                       |
|-----------------------------|-------------|----|-------------------------------------------------------------------------------------------------------------------------------------------------------------------------------------------------------------------------------------------|-----|---------|-------------------------------------------------------------------------------------------------------|
|                             |             |    | -Fast-track group (n=50);<br><br>-Non-fast-track group (n=50)                                                                                                                                                                             |     |         |                                                                                                       |
| Tan et al. 2018 [171]       | Prospective | OA | 230 patients:<br><br>-Fast-track group (n=115, mean age 64.6, 67.8% females);<br><br>-Non-fast-track group (n=115, mean age 63.9, 65.2% females)                                                                                          | THA | 6 weeks | ↓LOS, and ↑% patients with zero oral morphine in fast-track group                                     |
| Temporiti et al. 2020 [172] | Prospective | OA | 71 patients:<br><br>-Fast-track + mobilization and walking the day of surgery group (n=36, mean age 60.9, 57.14% females);<br><br>-Fast-track + mobilization and walking the day after surgery group (n=35, mean age 65.5, 61.7% females) | THA | 7 days  | ↑FIM total and motor scores and FIM self in fast-track + mobilization and walking the day of surgery  |
| Vesterby et al. 2017 [179]  | RCT         | OA | 72 patients (mean age 63.5, 53% females):<br><br>-Fast-track group (n=36);                                                                                                                                                                | THA | 1 year  | ↓LOS (from 2.1 to 1.1 days), number of post-op hospital contacts (at 12 months) in telemedicine group |

|                            |               |                                               |                                                                                                                                                                                              |                  |                      |                                                                                                                                                                                          |
|----------------------------|---------------|-----------------------------------------------|----------------------------------------------------------------------------------------------------------------------------------------------------------------------------------------------|------------------|----------------------|------------------------------------------------------------------------------------------------------------------------------------------------------------------------------------------|
|                            |               |                                               | -Fast-track + telemedicine group (n=36)                                                                                                                                                      |                  |                      |                                                                                                                                                                                          |
| Xie et al. 2019 [185]      | Retrospective | Fracture                                      | 609 patients (≥65 age, 53% females):<br><br>-Fast-track + prophylactic TXA (n=289);<br><br>-Fast-track no TXA (n=320)                                                                        | Hemiarthroplasty | 3 months             | ↓LOS, red blood cell transfusion risk (62%), %patients receiving at least 1 U of erythrocytes, and ↑Hb, % patients that ambulate within 24 h after surgery in TXA group vs. no TXA group |
| Zhang et al. 2020 [190]    | Prospective   | Avascular necrosis                            | 70 patients:<br><br>-Fast-track + clinical nursing pathway group (n=35, mean age 58.77±13.97, 60% females);<br><br>-Clinical nursing pathway group (n=35, mean age 59.66±11.24, 57% females) | THA              | 3 weeks and 3 months | ↑HHS, SF-36 score, satisfaction,<br>↓complications, hospitalization time in fast-track + clinical nursing pathway group vs. clinical nursing pathway                                     |
| <b><i>Knee and Hip</i></b> |               |                                               |                                                                                                                                                                                              |                  |                      |                                                                                                                                                                                          |
| Adams et al. 2021 [26]     | Retrospective | Failure of conservative joint pain management | Fast-track group 1200 patients (mean age 62.1, 49.5 females)                                                                                                                                 | SDD-TJA          | 30 days              | ↑FTL with general anesthesia,<br>↓complications and readmission rate                                                                                                                     |
| Alvis et al. 2021 [28]     | Retrospective | NR                                            | 282 patients:                                                                                                                                                                                | TKA and THA      | 30 days              | ↓LOS (2 vs. 3 days), opioid use, costs in fast-                                                                                                                                          |

|                            |               |    |                                                                                                                                                               |             |                     |                                                                                                                                        |
|----------------------------|---------------|----|---------------------------------------------------------------------------------------------------------------------------------------------------------------|-------------|---------------------|----------------------------------------------------------------------------------------------------------------------------------------|
|                            |               |    | -Fast-track group (n=186, mean age 63.5, 8.6% females);<br><br>-Non-fast-track group (n=96, mean age 65.0, 12.5% females)                                     |             |                     | track group vs. non-fast-track group                                                                                                   |
| Andreasen et al. 2017 [29] | Prospective   | NR | Fast-track group: 465 patients                                                                                                                                | THA and TKA | 1 year              | Median LOS: 2 days                                                                                                                     |
| Awada et al. 2019 [32]     | Prospective   | NR | Fast-track group: 104 patients (mean age 65.5, 61.5% females)                                                                                                 | THA and TKA | 0-3 days, 2-3 weeks | ↓Incidence of post-op cognitive dysfunction (3.9% patients, n=4)                                                                       |
| Berg et al. 2018 [34]      | Retrospective | OA | 14,148 patients:<br><br>-Fast-track group (n=7345, mean age 69.2±9.6, 56.5% females);<br><br>-Non-fast-track group (n=6803, mean age 69.5±9.8, 57.6% females) | THR and TKR | 30 and 90 days      | ↓LOS (3 vs. 5) in fast-track group vs. control group. =readmissions and complications                                                  |
| Berg et al. 2020 [35]      | Retrospective | OA | 55,245 patients:<br><br>-Fast-track group (n=32,558, mean age 68.5±9.5, 56.1% females);<br><br>-Non-fast-track (n=22,687, mean age                            | THR and TKR | 1 year              | ↑Satisfaction VAS, EQ-5D, EQ VAS, KOOS, and<br>↓LOS (2-4 vs. 4-7 days),<br>VAS pain score in fast-track group vs. non-fast-track group |

|                              |               |    |                                                                                                                                                              |             |         |                                                                                                                                                                                                      |
|------------------------------|---------------|----|--------------------------------------------------------------------------------------------------------------------------------------------------------------|-------------|---------|------------------------------------------------------------------------------------------------------------------------------------------------------------------------------------------------------|
|                              |               |    | 69±9.5, 57.8% females)                                                                                                                                       |             |         |                                                                                                                                                                                                      |
| Berg et al. 2021 [36]        | Retrospective | OA | 61,571 patients:<br><br>-Fast-track group (n=35,986, mean age 68.2, 68.2% females);<br><br>-Non-fast-track group (n=25,585, mean age 68.6, 57.7% females)    | THR and TKR | 2 years | ↑Risk of revision in THR but not in TKR in fast-track group; ↓TKR or similar THR mortality in fast-track compared to non-fast track group                                                            |
| Bjerregaard et al. 2015 [40] | Prospective   | NR | 1054 patients (≥18 age):<br><br>-Fast-track catheterized group (n=424, 62,5% females);<br><br>-Fast-track non-catheterized group (n=630, 58.4% females)      | THA and TKA | NR      | POUR incidence=40%; urinary bladder volume=0.6L; IPSS=6 in non-catheterized males and 8 in catheterized males, 6 in females in both groups. Spinal anesthesia increased the risk of POUR             |
| Bjerregaard et al. 2016 [41] | RCT           | NR | 721 patients:<br><br>-Fast-track with catheterization threshold 800-ml group (n=367);<br><br>-Fast-track with catheterization threshold 500-ml group (n=354) | THA and TKA | 30 days | LOS=2 days; ↓urinary catheterization, without increasing urological complications (13.4% vs. 32.2%) in fast-track with catheterization 800-ml group vs. fast-track with catheterization 500-ml group |

|                             |               |    |                                                                                                                                                    |             |         |                                                                                                                                                                                                |
|-----------------------------|---------------|----|----------------------------------------------------------------------------------------------------------------------------------------------------|-------------|---------|------------------------------------------------------------------------------------------------------------------------------------------------------------------------------------------------|
| Castle et al. 2021 [43]     | Retrospective | NR | 386 patients:<br><br>-Fast-track with mobilization <12 h (mean age 69.4±9.1);<br><br>-Fast-track with mobilization ≥12 h (mean age 69±8.6)         | THA and TKA | NR      | ↓LOS (0.5 days) in mobilization <12 h group vs. mobilization ≥12 h group (for THA). No reduction in LOS for TKA                                                                                |
| Christelis et al. 2015 [45] | Retrospective | OA | 709 patients:<br><br>-Fast-track group (n=297, mean age 67±10, 61.9% females);<br><br>-Non-fast-track group (n=412, mean age 68±11, 60.1% females) | TKA and THA | 6 weeks | ↓LOS (4.9 vs. 5.3 days), pain score, urinary catheter removal time and ↑patient satisfaction, patients ready for discharge on day 3 (59% vs. 41%) in fast-track group vs. non-fast-track group |
| Davies et al. 2018 [52]     | Retrospective | NR | 673 patients:<br><br>-Fast-track + TXA group (n=446, mean age 67.3, 54.2% females);<br><br>-Non-fast-track (n=227, mean age 68.7, 66.1% females)   | THR and TKR | 90 days | ↓LOS (5 vs. 6 days), costs, blood transfusion (n=28, 6.3% vs. n=40, 17.6%), and ↑Hb postoperative in fast-track + TXA group vs. non-fast-track group                                           |
| Drosos et al. 2020 [63]     | Retrospective | NR | 443 patients:<br><br>-Pre-fast-track + P group;                                                                                                    | TKR and THR | 30 days | TKR: ↑blood loss, transfusion in non-fast-track and P groups vs. P + BMP and P + BMP + PMP groups. ↓LOS (by                                                                                    |

|                             |               |    |                                                                                                                                                 |                                  |                        |                                                                                                                                                                                                                   |
|-----------------------------|---------------|----|-------------------------------------------------------------------------------------------------------------------------------------------------|----------------------------------|------------------------|-------------------------------------------------------------------------------------------------------------------------------------------------------------------------------------------------------------------|
|                             |               |    | -Pre-fast-track + P + BMP group;<br>-Fast-track + P + BMP + PMP group;<br>-Non-fast-track group                                                 |                                  |                        | 1.5, 1.56 and 2.1 days) in P, P + BMP and P + BMP + PMP groups vs. non-fast-track group.<br><br>THR: ↓LOS (by 1.0, 1.5 and 2.2 days), transfusion in P, P + BMP and P + BMP + PMP groups vs. non-fast-track group |
| Fenelon et al. 2018 [66]    | Retrospective | NR | 1467 patients:<br>-Fast-track group (n=727, mean age 70.7±9.8, 67.3% females);<br>-Non-fast-track group (n=740, mean age 70±9.9, 59.9% females) | Primary and revision THA and TKA | NR                     | ↓Intra-op and peri-op blood transfusion, blood loss, costs in fast-track group vs. non-fast-track group                                                                                                           |
| Frassanito et al. 2020 [71] | Prospective   | OA | Fast-track group: 207 patients                                                                                                                  | THR and TKR                      | 1, 3 and 6 months      | ↓LOS (<4 days), and ↑satisfaction (94.4%), KOOS, knee flexion-extension, HOOS, hip abduction (in post-op vs. pre-op), ROM                                                                                         |
| Galbraith et al. 2017 [73]  | Retrospective | OA | 310 patients:<br>-Fast-track group (n=165, 42.4% females);                                                                                      | THA and TKA                      | 30 and 90 days, 1 year | ↓LOS (5.1 vs. 8.79 days), and ↑discharge in fast-track group vs. non-fast-track group                                                                                                                             |

|                          |               |    |                                                                                                                                                                                                                 |             |         |                                                                                                                                                                                                                                                    |
|--------------------------|---------------|----|-----------------------------------------------------------------------------------------------------------------------------------------------------------------------------------------------------------------|-------------|---------|----------------------------------------------------------------------------------------------------------------------------------------------------------------------------------------------------------------------------------------------------|
|                          |               |    | -Non-fast-track group<br>(n=145, 48.3% females)                                                                                                                                                                 |             |         |                                                                                                                                                                                                                                                    |
| Glassou et al. 2014 [74] | Retrospective | OA | 66,733 patients:<br><br>-Fast-track group<br>(n=17,284 procedures, mean age 69±10, 58% females);<br><br>-Non-fast-track group<br>(n=61,814 procedures, mean age 69±10, 59% females)                             | THA and TKA | 90 days | ↓LOS, readmission for thromboembolic event, and ↑readmission for infection in fast-track group vs. non-fast-track group                                                                                                                            |
| Halawi et al. 2019 [82]  | Retrospective | OA | 378 patients:<br><br>-Fast track without post-op catheterization group (n=213, mean age 60.2±11.2, 46% females);<br><br>-Fast track with post-op catheterization group (n=145, mean age 63.1±12.7, 51% females) | THA and TKA | NR      | THA patients: POUR associated with age >60, intra-op fluid volume >1350 mL, and intraoperative placement of an indwelling bladder catheter.<br><br>TKA patients: POUR significantly associated with intra-op indwelling bladder catheter placement |
| Holm et al. 2014 [89]    | Prospective   | OA | Fast-track group: 150 patients (THA: n=75, mean age 67±9.1, 58.6% females; TKA: n=75, 65±9.6, 68% females)                                                                                                      | TKA and THA | NR      | Median discharge readiness and actual LOS until discharge: 2 days. Age as independent predictor of discharge readiness                                                                                                                             |

|                             |               |    |                                                                                       |             |                |                                                                                                                                                                                                                                               |
|-----------------------------|---------------|----|---------------------------------------------------------------------------------------|-------------|----------------|-----------------------------------------------------------------------------------------------------------------------------------------------------------------------------------------------------------------------------------------------|
| Husted et al. 2016 [95]     | Prospective   | OA | Fast-track group: 13,730 procedures                                                   | THA and TKA | 90 days        | LOS=2 days; 30-day readmission rate=6.1% for THA and 5.9% for TKA; 90-day readmission rate=8.6% for THA and 8.3% for TKA                                                                                                                      |
| Husted et al. 2012 [94]     | Retrospective | OA | NR                                                                                    | THA and TKA | NR             | ↓LOS from 10-11 days to 4 days                                                                                                                                                                                                                |
| Husted et al. 2011b [12]    | Prospective   | NR | Fast-track group: 207 patients (mean age 66, 56.5% females)                           | THA and TKA | 6 months       | LOS=2.4 days (for TKA group) and 2.2 days (for THA group)                                                                                                                                                                                     |
| Jørgensen et al. 2021 [103] | Prospective   | NR | Fast-track group: 9,987 patients (mean age 70±14, 62.2% females)                      | TKA and THA | 19 months      | LOS=1.9 days (80% patients with surgery from Monday to Wednesday, 17% with LOS >2 days vs. 19% operated on Thursday and Friday). In high-risk patients, ↑LOS >2 days with surgery on Thursdays or Fridays (43%) vs. Monday to Wednesday (37%) |
| Jørgensen et al. 2017 [102] | Prospective   | NR | 3,927 patients:<br><br>-Fast-track + MP group (n=1,442, mean age 69, 40.36% females); | TKA and THA | 30 and 90 days | ↓LOS in fast-track + MP group vs. fast-track alone group                                                                                                                                                                                      |



|                              |             |    |                                                                   |                              |                |                                                                                                                                                                                                                                                                                                                                                                 |
|------------------------------|-------------|----|-------------------------------------------------------------------|------------------------------|----------------|-----------------------------------------------------------------------------------------------------------------------------------------------------------------------------------------------------------------------------------------------------------------------------------------------------------------------------------------------------------------|
|                              |             |    | -Fast-track group<br>(n=2,485, mean age 68, 38.2% females)        |                              |                |                                                                                                                                                                                                                                                                                                                                                                 |
| Jørgensen et al. 2013b [101] | Prospective | NR | Fast-track group: 3,112 patients (mean age 67, 57% females)       | Primary elective THA and TKA | 30 and 90 days | LOS=3.0 days; readmission rate=6.6% at 30 days, 9.3% at 90 days; Mortality=0.22% at 30 days, 0.42% at 90 days                                                                                                                                                                                                                                                   |
| Jørgensen et al. 2013a [24]  | Prospective | NR | Fast-track group: 5,145 patients (age range 18-97, 56.9% females) | THA and TKA                  | 90 days        | LOS=3 days in fallers vs. 2 days in patients without falls; injuries: “none” or minor in 39.8%, moderate in 9.6%, major in 50.6%. 54.8% falls within 1 month of discharge. Falls due to physical activity (12.0%) and extrinsic factors (14.5%) occurred later than did surgery-related falls (73.5%), contributing to 40% of all falls 30 days after discharge |
| Jenny et al. 2020 [97]       | Prospective | NR | Fast-track group: 1,949 patients (mean age 70±11, 58.2% females)  | THA and TKA                  | 3 months       | LOS=3.3±2.9 days for THA and 4.4±3.3 days for TKA; ↑bleeding vs. VTE complications (1.7% vs. 0.7%) after THA                                                                                                                                                                                                                                                    |

|                             |               |      |                                                                                                                                                          |               |                        |                                                                                                                                                                         |
|-----------------------------|---------------|------|----------------------------------------------------------------------------------------------------------------------------------------------------------|---------------|------------------------|-------------------------------------------------------------------------------------------------------------------------------------------------------------------------|
| Krenk et al. 2014 [113]     | Prospective   | POCD | Fast-track group: 225 patients (mean age 68)                                                                                                             | THA and TKA   | 1-2 weeks and 3 months | LOS=2 days; MMSE score=28; POCD=9.1% (at 1-2 weeks) and 8.0% (at 3 months)                                                                                              |
| Krenk et al. 2012 [112]     | Prospective   | OA   | Fast-track group: 225 patients (median age 70, 50.6% females)                                                                                            | THA and TKA   | 12 days                | LOS=2.6 days; no patients developed delirium                                                                                                                            |
| Kort et al. 2018 [111]      | Retrospective | OA   | Fast-track group: 638 patients (65.5% females)                                                                                                           | THA, TKA, UKA | 1 year                 | POUR=12.9%                                                                                                                                                              |
| Kerr et al. 2017 [106]      | Retrospective | OA   | Fast-track group: 109 patients (mean age 72, 60.55% females)                                                                                             | THA and TKA   | 4 weeks                | 56% of patients discharge at day 5; delay in discharge: oozing wounds (25 patients), medical problems (20 patients), failure to reach physiotherapy goals (14 patients) |
| Lovecchio et al. 2016 [127] | Retrospective | OA   | 24,292 patients (age range 60-69):<br><br>-Fast-track inpatients group (n=1,476, 55% females);<br><br>- Fast-track outpatient group (n=492, 56% females) | THA and TKA   | 30 days                | ↓Complication rates (1.1% vs. 6.3%), transfusion rate (0.1% vs. 4.1%) in inpatients group vs. outpatients' group                                                        |
| Machin et al. 2013 [128]    | Retrospective | OA   | 226 patients:                                                                                                                                            | THA and TKA   | Mean 26.8              | ↑Patient satisfaction and health scores, recovery in fast-track group vs. non-fast-track group                                                                          |

|                              |               |    |                                                                                                                                                                                                                                                                                                                                          |             |         |                                                                                                                                                                                                                                                                                                         |
|------------------------------|---------------|----|------------------------------------------------------------------------------------------------------------------------------------------------------------------------------------------------------------------------------------------------------------------------------------------------------------------------------------------|-------------|---------|---------------------------------------------------------------------------------------------------------------------------------------------------------------------------------------------------------------------------------------------------------------------------------------------------------|
|                              |               |    | <p>-Fast-track group (n=101, mean age 62.7);</p> <p>-Non-fast-track group (n=125, mean age 66.6)</p>                                                                                                                                                                                                                                     |             |         |                                                                                                                                                                                                                                                                                                         |
| Mentsoudis et al. 2020 [132] | Retrospective | OA | <p>1,540,462 patients:</p> <p>-High fast-track group (&gt;6 fast-track components, n=324,437, mean age 66, 61.55% females);</p> <p>-Medium fast-track group (5-6 fast-track components, n=965,953, mean age 66, 60.41% females);</p> <p>-Low fast-track group (&lt;5 fast-track components, (n=250,072, mean age 67, 69.08% females)</p> | TKA and THA | NR      | <p>↑Levels of fast-track associated with ↓in ‘any complication, mortality, blood transfusions, and length of stay’: ‘Medium’ vs. ‘Low’ and ‘High’ vs. ‘Low’; individuals fast-track components with the strongest effect: early physical therapy, avoidance of urinary catheter, TXA administration</p> |
| Petersen et al. 2017 [141]   | Prospective   | OA | <p>Fast-track group: 6331 patients (≥70 years)</p>                                                                                                                                                                                                                                                                                       | UKA         | 90 days | <p>43 cases of post-op delirium that contributed to a LOS &gt;4 days. These patients were older than the patients without delirium by 4.0 years (81 vs. 77 years)</p>                                                                                                                                   |

|                             |             |                     |                                                                |             |         |                                                                                                                                                                                                                     |
|-----------------------------|-------------|---------------------|----------------------------------------------------------------|-------------|---------|---------------------------------------------------------------------------------------------------------------------------------------------------------------------------------------------------------------------|
| Petersen et al. 2019 [142]  | Prospective | OA                  | Fast-track group: 32247 patients (mean age 69, 58% females)    | TKA and THA | 90 days | ↓LOS from a median of 3 days in 2010 to 1 days in 2017. % of LOS >4 days ↓from 9.6% to 4.4%                                                                                                                         |
| Petersen et al. 2020a [143] | Prospective | OA                  | Fast-track group: 1427 patients (mean age 87, 71% females)     | TKA and THA | 90 days | ↓LOS from median 4 days in 2010 to 2 days in 2017. LOS >4 days ↓from 32% to 18%                                                                                                                                     |
| Petersen et al. 2021 [145]  | Prospective | Revision hip and KA | Fast-track group: 2814 patients (mean age 67.7, 63.2% females) | TKA and THA | 90 days | Median LOS 3 days; 21% with LOS >5 days. 90-day incidence of VTE: 0.42%, with 0.28% DVT and 0.14% pulmonary embolisms, after median 14 days with the latest on day 31                                               |
| Pitter et al. 2016 [147]    | Prospective | OA                  | Fast-track group: 522 patients (mean age 87, 74.5% females)    | TKA and THA | 90 days | LOS >4 days in 27.3%; readmission rates of 14.2% and 17.9% within 30 and 90 days; 75.5% of medical readmissions within 90 days mainly due to falls and suspected but disproved VTE events. 2.0% of 90-day mortality |
| Plenge et al. 2020 [148]    | Prospective | OA                  | Fast-track group: 186 patients (mean age 62, 68.3% females)    | TKA and THA | 30 days | Median LOS 4 days; 30-day readmission rate 3.8%; 'days alive and at home up to 30 days after surgery' 26 days; on the first post-op day, out-of-bed mobilization was                                                |

|                             |               |    |                                                                                                                    |             |                 |                                                                                                                                                                                                                                                                                                                                                                                                                 |
|-----------------------------|---------------|----|--------------------------------------------------------------------------------------------------------------------|-------------|-----------------|-----------------------------------------------------------------------------------------------------------------------------------------------------------------------------------------------------------------------------------------------------------------------------------------------------------------------------------------------------------------------------------------------------------------|
|                             |               |    |                                                                                                                    |             |                 | achieved by 38.1% patients, multimodal analgesic regimens administered to 16.0% of patients                                                                                                                                                                                                                                                                                                                     |
| Robinson et al. 2014 [153]  | Prospective   | OA | Fast-track group: 96 patients (mean age 72, 62.5% females)                                                         | TKA and THA | Until discharge | Median LOS: 3 days; TXA given to 90% of patients; only 58% of patients received NSAIDs; ↑pain scores in TKA vs. in THA                                                                                                                                                                                                                                                                                          |
| Romano et al. 2021 [154]    | Retrospective | OA | 181 patients (mean age 71.5, 47.5% females):<br><br>-Fast-track group (n=122);<br><br>-Non-fast-track group (n=59) | TKA and THA | 36 months       | Fast-track group vs non-fast-track: ↓median LOS, ↑predischarge mean Hb, ↓risk of transfusion, ↓risk of reinfusion, ↑odds ratio of low pain on the first day, ↑risk difference of ambulating the first day, ↓odds ratio of rehabilitation hospital admission, ↑odds ratio of discharge, ↓tourniquet, surgical times, use of catheters and drains. ↓complications at 6, 12, 24, and 36 months in fast-track group |
| Savaridas et al. 2013 [158] | Prospective   | OA | 4500 patients (mean age 68.5, 51.2% females):                                                                      | TKA and THA | 24 months       | ↑Survival probability up to 3.7 years post-surgery in fast-track group                                                                                                                                                                                                                                                                                                                                          |

|                             |                            |    |                                                                                                                                              |             |                 |                                                                                                                                                                                                 |
|-----------------------------|----------------------------|----|----------------------------------------------------------------------------------------------------------------------------------------------|-------------|-----------------|-------------------------------------------------------------------------------------------------------------------------------------------------------------------------------------------------|
|                             |                            |    | -Fast-track group (n=1500);<br><br>-Non-fast-track group (n=3000)                                                                            |             |                 |                                                                                                                                                                                                 |
| Stambough et al. 2019 [167] | Retrospective              | OA | Fast-track + general anesthesia (n=1527, <55 years: 17%, 55-64 years: 31%, 65-74 years: 34%, >75 years: 19%, 57% females)                    | TKA and THA | 90 days         | 96.3% of patients discharged on post-op day 1, and 97.2% participate to physical therapy on the day of surgery; 0.4% patients required ICU; 90-day readmission rate 2.4%, reoperation rate 1.3% |
| Starks et al. 2014 [168]    | Prospective                | OA | Fast-track group: 2128 patients (mean age 71, 64.6% females)                                                                                 | TKA and THA | Until discharge | Median LOS: 4 days; ↓LOS in patients ≥85: from 9 to 5 days. Readmission rates >45%                                                                                                              |
| Stowers et al. 2016 [169]   | Prospective, Retrospective | OA | 206 patients:<br><br>-Fast-track group (n=106, mean age 66.7, 53% females);<br><br>-Non-fast-track group (n=100, mean age 65.4, 59% females) | TKA and THA | Until discharge | ↓Median LOS reduced after fast-track (5 non-fast-track vs. 4 fast-track). ↓overall cost in fast-track                                                                                           |
| Tucker et al. 2016 [173]    | Prospective                | OA | Fast-track group (n=40, mean age 66 for THR and 76 for TKR, 57.5% females)                                                                   | TKA and THA | 2 day           | Median LOS for THA 1.8 days and for TKA 1.9 days; ↓pain score                                                                                                                                   |

|                              |               |    |                                                      |                                  |         |                                                                                                                                                                                                                                                                                                                 |
|------------------------------|---------------|----|------------------------------------------------------|----------------------------------|---------|-----------------------------------------------------------------------------------------------------------------------------------------------------------------------------------------------------------------------------------------------------------------------------------------------------------------|
| Van Horne et al. 2019a [176] | Retrospective | OA | Fast-track group (n=601, mean age 72, 56.7% females) | TKA and THA                      | 30 days | 84.0% of patients discharged the same day, 13.8% in 1 day, 2.2% in >1 day; rates of minor and severe adverse events within 30 days: 0.5% and 1.1%, respectively. 1.9% of patients with unplanned readmissions within 30 days; ↑patient-reported satisfaction; 84.2% patients do not require >1 seven-day opioid |
| Van Horne et al. 2019b [177] | Retrospective | OA | Fast-track group (n=220, mean age 58, 49% females)   | TKA and THA                      | 60 days | Within 30 days 2.8% patients with an adverse event; within 60 days, 3.2% patients with an emergency department/urgent care visit. 82.1% patients without a second opioid prescription; ↑patient satisfaction                                                                                                    |
| Winther et al. 2015 [183]    | Retrospective | OA | Fast-track group (n=920, mean age 58, 49% females)   | Primary and revision TKA and THA | 1 years | Mean LOS: 3.1 days for primary patients, 4.2 days for THA revision and 3.9 for TKA revision; mean patient satisfaction: 9.3 out of a max. of 10; revision rates until 1-year follow-up: 2.9% and 3.3% for primary hip and knee patients, and 3.7%                                                               |

|                         |               |                               |                                                                                                                                                   |             |         |                                                                                                            |
|-------------------------|---------------|-------------------------------|---------------------------------------------------------------------------------------------------------------------------------------------------|-------------|---------|------------------------------------------------------------------------------------------------------------|
|                         |               |                               |                                                                                                                                                   |             |         | and 7.1% for revision hip and knee patients                                                                |
| Xu et al. 2019 [186]    | Prospective   | OA and inflammatory arthritis | 6325 patients (mean age 66.60±8.75, 78.59% females):<br><br>-Fast-track + drain (n=4540);<br><br>-Fast-track no drain (n=1785)                    | TKA and THA | NR      | Drain use correlated significantly to a ↑transfusion rate and a longer LOS                                 |
| Yanik et al. 2018 [188] | Retrospective | OA                            | 252 patients:<br><br>-Fast-track group (n=78, mean age 66.56, 10.3% females);<br><br>-Non-fast-track group (n=174, mean age: 65.89, 9.8% females) | TKA and THA | 90 days | ↓Average LOS in fast-track group from 3.2 to 1.7 days; ↑of 12.3% in patients discharge in fast-track group |

**Abbreviations:** OA = osteoarthritis; n = number; TKA = total knee arthroplasty; ↑ = increase; vs. = versus; NR = not reported; LOS = hospital length of stay; DVT = deep vein thrombosis; min = minutes; ↓ = decrease; h = hours; NRS = numerical rating scale; RCT = Randomized controlled trial; VAS = visual analog scale; TNF-α = Tumor necrosis factor-α; SOD-1 = superoxide dismutase-1; Mb = myoglobin; PTX3 = Pentraxin 3; CCL2 = C-C Motif Chemokine Ligand 2; PGE2 = Prostaglandin E2; ROM = range of motion; MRC = Medical Research Council; TKR = total knee replacement; Hb = hemoglobin; PACU = post-anesthesiological care unit; MME = Morphine Milligram Equivalents; IV = intravenous; TXA = tranexamic acid; TUG = Timed Up and Go test; UKA = unilateral knee arthroplasty; PROMS = Patient-reported outcome scores; PES = pathway management solution; HADS = Hospital Anxiety and Depression Scale; DOS = day of surgery; FNB = femoral nerve block; LB-PAI = liposomal bupivacaine pericapsular injection; ACC = adductor canal catheter; iPACK = posterior capsule single shot block; ME = morphine equivalents; PCA = patient-controlled analgesia; HRQOL = Health Related Quality of Life; SF-36 = 36-item Short Form Health Survey; MP = methylprednisolone; LUIC = length of uninterrupted institutional care; VTE = venous thromboembolism; OS = outpatient surgery; pre-op = preoperative; post-op = postoperative; IA = intra-articular; KSS = Knee Society Score; LIA = local infiltration analgesia; THA = total hip arthroplasty; THR = total hip replacement; PONV = postoperative nausea and vomiting; HHS = Harris hip score; EQ = Euro Quality of Life; EBL = estimated blood loss; HA = hip arthroplasty; PFNA = proximal femoral nail anti-rotation; ICOAP = intermittent and constant osteoarthritis pain score; HOOS-PS = hip injury and osteoarthritis outcome score physical function short form; LMWE = low-molecular-weight eparin; OHS = Oxford hip score; ABT = allogeneic blood transfusions; WOMAC = Western Ontario and McMaster University osteoarthritis index; ASA = American Society of Anaesthesiologists; LINFA = local infusion analgesia; FIM = Functional Independence Measure; SDD = same-day discharge; TJA = total joint arthroplasty; FTL = failure to launch; KOOS = Knee injury and Osteoarthritis Outcome Score; POUR = postoperative urinary retention; IPSS = international prostate symptom score; P = physiotherapy and rehabilitation; BMP = blood management program; PMP = pain management program; intra-op = intraoperative; HOOS = Hip disability and



Osteoarthritis Outcome Score; POCD = postoperative cognitive dysfunction; MMSE = Mini Mental State Examination; KA = knee arthroplasty; NSAIDs = nonsteroidal anti-inflammatory drugs; ICU = intensive care unit.

**Table S7.** Fast-track components of included literatures studies on orthopedic surgery.

| References               | Fast-track                                                                                     |                                                                           |                                                                                  |
|--------------------------|------------------------------------------------------------------------------------------------|---------------------------------------------------------------------------|----------------------------------------------------------------------------------|
|                          | Preoperative                                                                                   | Intraoperative                                                            | Postoperative                                                                    |
| <i>Spine</i>             |                                                                                                |                                                                           |                                                                                  |
| Adeyemo et al. 2021 [27] | Behavioral health, psychology, nutrition and mineral metabolism, patient education, geriatrics | TXA, controlled epidural analgesia, normotension, transfusional protocols | Early mobilization, multimodal analgesia, thromboprophylaxis, nutrition protocol |

|                           |                                                                                                                                                                                                                                  |                                                                                                                  |                                                                                                                                                                   |
|---------------------------|----------------------------------------------------------------------------------------------------------------------------------------------------------------------------------------------------------------------------------|------------------------------------------------------------------------------------------------------------------|-------------------------------------------------------------------------------------------------------------------------------------------------------------------|
|                           | consultation (>65), physical therapy                                                                                                                                                                                             |                                                                                                                  |                                                                                                                                                                   |
| Dagal et al. 2019 [51]    | Patient education, nutritional support, carbohydrate loading                                                                                                                                                                     | GDHM, blood loss control (PPV, SVV, or CO), antifibrinolytics                                                    | Opioid-sparing multimodal analgesia (acetaminophen, gabapentin, ketamine)                                                                                         |
| d'Astorg et al. 2020 [50] | Patient education                                                                                                                                                                                                                | Opioid-sparing multimodal approach, early catheters and drains removal                                           | Early mobilization, follow-up phone call (day 1), surgical consultation (4-6 weeks)                                                                               |
| Debono et al. 2019 [55]   | Patient education, infection prophylaxis                                                                                                                                                                                         | Analgesia, no drain, opioid-sparing multimodal approach                                                          | Early mobilization, online/phone survey                                                                                                                           |
| Debono et al. 2021 [56]   | Consultation, online pre-admission and education, anti-infection prophylaxis                                                                                                                                                     | Disinfection protocol, no premedication, drain and neck brace, pre-emptive analgesia                             | Early mobilization, surgical consultation, satisfaction phone survey, online clinical evaluation                                                                  |
| Feng et al. 2019 [67]     | Patient education, fasting carbohydrate loading (6 h for liquids, 8 h for solid food and short-chain polypeptides drinks, 2 h for clear liquids), pre-emptive analgesia (oral celecoxib 200 mg and pregabalin 150 mg 1 h before) | Antimicrobial prophylaxis (1.5 g cefuroxime 1 h before), TXA (30 min before), normothermia and normovolemia, LIA | Early mobilization, multimodal analgesia (IV parecoxib 40 mg, oral celecoxib 200 mg, pregabalin 75 mg every 12 h, intramuscular tramadol 100 mg), early nutrition |
| Fletcher et al. 2020 [68] | Consulting                                                                                                                                                                                                                       | NR                                                                                                               | Early mobilization, feeding, catheters and drains removal (day 1)                                                                                                 |
| Fletcher et al. 2021 [69] | NR                                                                                                                                                                                                                               | NR                                                                                                               | NR                                                                                                                                                                |
| He et al. 2020 [85]       | TXA IV 10 mg/kg (15 min before)                                                                                                                                                                                                  | General anesthesia, TXA IV 6-8 mg/kg/h (up to 15 mg/kg)                                                          | Early drainage removal (<30 ml for 24 h)                                                                                                                          |

|                                     |                                                                                                                                                                                                                              |                                                                                                                                                                                                                                                                         |                                                                                                                                                                        |
|-------------------------------------|------------------------------------------------------------------------------------------------------------------------------------------------------------------------------------------------------------------------------|-------------------------------------------------------------------------------------------------------------------------------------------------------------------------------------------------------------------------------------------------------------------------|------------------------------------------------------------------------------------------------------------------------------------------------------------------------|
| Heo et al. 2019 [86]                | Patient education, emotional support, pre-emptive analgesic (pregabalin 75 mg or gabapentin 300 mg), antibiotics (cephalosporin), IV TXA and antiemetics (PONV prevention)                                                   | Local anesthetic, IV TXA and antibiotics, drainage catheter (epidural hematoma prevention), vancomycin                                                                                                                                                                  | Early mobilization, pain control (IV PCA, oral analgesic w/ pregabalin or gabapentin), thromboprophylaxis, intermittent legs pneumatic compression orthosis, nutrition |
| Julien-Marsollier et al. 2020 [104] | Patient information                                                                                                                                                                                                          | Dexmedetomidine and ketamine                                                                                                                                                                                                                                            | Early mobilization, PCA, opioid-sparing pharmacological and non-pharmacological techniques, feeding, oral medication and urinary catheters and drains removal          |
| Kilic et al. 2020 [107]             | Patient education, no smoking, antimicrobial skin cleaning, decreased stress, physiologic function maintenance, clear fluids 2 h and solid food 4 h before, pain management (oral gabapent 300 mg and acetaminophen 1000 mg) | Antibiotic prophylaxis, LMWE, IV 0.15 mg/kg ondansetron and 0.2 mg/kg dexamethasone, TIVA, normothermia, IV 1.5 g TXA and topically 1 g in 100 mL saline, fluid and blood transfusions only with Hb <8 g/dL, 30 cc marcaine hydrochloride 0.5%, no catheters and drains | Early mobilization, opioid-sparing approach (acetaminophen, NSAIDs or tramadol), food and drink intake                                                                 |
| Li et al. 2018 [118]                | Patient education, no bowel preparation, fasting 6 h and water 2 h before, PONV and antithrombotic prophylaxis                                                                                                               | Local anesthesia (0.75% ropivacaine), multimodal analgesia, IV NSAIDs (40 mg parecoxib every 12 h or 100 mg flurbiprofen for 3 days and oral 100 mg celecoxib)                                                                                                          | Early mobilization, less infusion volume (1000 ml x 2 days), early oral food intake, catheters and drainage removal                                                    |
| Li et al. 2020a [119]               | Patient education, nutritional counselling, clear fluids and carbohydrate drink up to 2 h before, thromboprophylaxis, antimicrobial/antibiotic prophylaxis                                                                   | TXA, TIVA (propofol, lidocaine, ketamine, ketorolac, antiemetics and anesthetics), LIA, multimodal analgesia, euvoemia, normothermia (36–37°C)                                                                                                                          | Early mobilization, multimodal analgesia, oral feeding and bladder catheter removal                                                                                    |

|                             |                                                                                                                                                                      |                                                                                                                                                                                                                                                                                                  |                                                                                                                                             |
|-----------------------------|----------------------------------------------------------------------------------------------------------------------------------------------------------------------|--------------------------------------------------------------------------------------------------------------------------------------------------------------------------------------------------------------------------------------------------------------------------------------------------|---------------------------------------------------------------------------------------------------------------------------------------------|
| Li et al. 2021a [121]       | Patient education, nutritional counselling, clear fluids and carbohydrate drink up to 2 h before surgery, thromboprophylaxis, antimicrobial/antibiotic prophylaxis   | TXA, TIVA (propofol, lidocaine, ketamine, ketorolac, antiemetics and anesthetics), LIA, multimodal analgesia, euvoemia, normothermia (36–37°C)                                                                                                                                                   | Early mobilization, multimodal analgesia, oral feeding and bladder catheter removal                                                         |
| Nazarenko et al. 2016 [135] | Patient preparation                                                                                                                                                  | Regional anesthesia                                                                                                                                                                                                                                                                              | Short-acting anesthetics, early rehabilitation                                                                                              |
| Shaw et al. 2021 [160]      | NR                                                                                                                                                                   | Methadone (29.5 MME, 0.5 MME/kg or 0.1 mg/kg)                                                                                                                                                                                                                                                    | Morphine PCA (0.02 mg/kg), oral hydrocodone and acetaminophen (5-10 mg/325mg), ketorolac (0.5 mg/kg), 300 mg gabapentin and diazepam (2 mg) |
| Soffin et al. 2019b [162]   | Patient education, fasting and carbohydrate loading, oral pre-emptive analgesia (1000 mg acetaminophen and 300 mg gabapentin), PONV (1.5 mg scopolamine transdermal) | TIVA (50–100 mg/kg/min propofol and 0.1–0.5 mg/min ketamine), isoflurane or sevoflurane, antimicrobial and antiemetic prophylaxis (IV 4 mg ondansetron, 4–8 mg dexamethasone), normovolemia, normothermia, non-opioid analgesia (15–30 mg ketorolac, 1–2 mg/kg/h lidocaine), no drains/ catheter | Early mobilization, no IV fluid and nutrition (oral diet), opioid-sparing multimodal analgesia                                              |
| Soffin et al. 2019a [20]    | Patient education, oral intake, pre-emptive analgesia (1000 mg acetaminophen, 300 mg gabapentin), PONV (1.5 mg transdermal scopolamine)                              | Opioid-sparing anesthesia and analgesia, PONV, normothermia (36.0-37.0°C), normovolemia (IV 10–15 ml·kg <sup>-1</sup> fluid), antibiotics, no drain or catheter                                                                                                                                  | Early mobilization, early oral intake, opioid-sparing multimodal analgesia (acetaminophen, NSAIDs, tramadol, oxycodone)                     |
| Soffin et al. 2019c [163]   | Patient education, oral 1000 mg acetaminophen and 300 mg gabapentin                                                                                                  | General anesthesia, premedication (midazolam 0.05 mg/kg), propofol (50–150 µg/kg/h), ketamine (0.1–0.5 mg/min), lidocaine (2 mg/kg/h),                                                                                                                                                           | Feeding, nonopioid analgesics (acetaminophen, ketorolac,                                                                                    |

|                             |                                                                                                                                                                      |                                                                                                                                                                                                                          |                                                                                                                                                                                              |
|-----------------------------|----------------------------------------------------------------------------------------------------------------------------------------------------------------------|--------------------------------------------------------------------------------------------------------------------------------------------------------------------------------------------------------------------------|----------------------------------------------------------------------------------------------------------------------------------------------------------------------------------------------|
|                             |                                                                                                                                                                      | isoflurane or sevoflurane, antiemetic therapy (4-8 mg dexamethasone, 4 mg ondansetron, 15-30 mg ketorolac)                                                                                                               | gabapentin), tramadol or oxycodone, PONV                                                                                                                                                     |
| Soffin et al. 2020 [164]    | Patient education, fasting and carbohydrate loading, pre-emptive analgesia (oral 300 mg gabapentin, 1000 mg acetaminophen within 60 min), PONV (scopolamine patches) | PONV (4–8 mg dexamethasone, ondansetron), IV multimodal anesthesia (propofol, dexmedetomidine, ketamine), analgesia (ketorolac, lidocaine, ketamine), antimicrobial prophylaxis, normothermia (36-38°C) and normovolemia | Early mobilization and nutrition, constipation and ileus prevention, opioid-sparing multimodal analgesia (acetaminophen, ketorolac, gabapentin, tramadol, dextromethorphan)                  |
| Staartjes et al. 2019 [166] | Patient education, no smoking and alcohol, nutritional counseling, antimicrobial and antithrombotic prophylaxis                                                      | General anesthesia (propofol, sufentanil), LIA (2.5 mg/ml ropivacaine intramuscularly), vasopressors, muscle relaxants use limited, normothermia                                                                         | Early mobilization, opioid-sparing analgesia (NSAIDs, paracetamol, patient-controlled w/ short-acting opioids), early drains and urinary catheters removal, solids and fluids intake (day 0) |
| Venkata et al. 2018 [178]   | Patient education and information                                                                                                                                    | General anesthesia, antibiotic prophylaxis (1.5 g cefuroxime), no drain or catheter                                                                                                                                      | Early mobilization multimodal analgesia                                                                                                                                                      |
| Wang et al. 2020 [180]      | Patient education and counseling, no prolonged fasting, antimicrobial prophylaxis                                                                                    | Anesthetic protocol                                                                                                                                                                                                      | Early mobilization, multimodal analgesia, antithrombotic prophylaxis, gastrointestinal management, early feeding and bladder catheter removal                                                |
| Yang et al. 2020 [187]      | Patient education (procedure, LOS, recovery), diet (clear liquid), neurontin (30 min before)                                                                         | Intrathecal morphine                                                                                                                                                                                                     | Early mobilization, multimodal analgesia (patient-controlled, discontinued day 1, and oral oxycodone, valium, neurontin, tylenol, toradol), high fiber diet, neurontin                       |

| <i>Thorax</i>                  |                                                                                                                                  |                                                                                                                                                                                                      |                                                                                                                                                                                  |
|--------------------------------|----------------------------------------------------------------------------------------------------------------------------------|------------------------------------------------------------------------------------------------------------------------------------------------------------------------------------------------------|----------------------------------------------------------------------------------------------------------------------------------------------------------------------------------|
| Holmes et al. 2019 [90]        | Patient education                                                                                                                | Lidocaine infused bilateral paravertebral catheters (until 2 to 3 days after discharge), PCA (hydromorphone, fentanyl or morphine), ketorolac, acetaminophen, gabapentin and transdermal scopolamine | Early ambulation, catheter removal, general diet, no bowel movement, PCA discontinuation, oral pain medications                                                                  |
| Mangat et al. 2020 [130]       | Carbohydrate drink (2 h prior), fluids (500-1000 ml), celecoxib (100-200 mg), gabapentin (15-900 mg), acetaminophen (15-1000 mg) | Maintenance anesthetic and fluids, epidural loading and infusion, ketamine, dexmedetomidine, ketorolac                                                                                               | Epidural infusion, morphine or hydromorphone, diet, acetaminophen, gabapentin, ibuprofen, oxycodone                                                                              |
| Pirsaharkhiz et al. 2020 [146] | NR                                                                                                                               | ESP block, general anesthesia, catheter on ipsilateral chest (4-14 days), 20 ml 0.2% ropivacaine and continuous infusion                                                                             | NR                                                                                                                                                                               |
| Wharton et al. 2020 [181]      | Patient education, consulting, exercise, gabapentin (300 mg), bowel clean (8.5 g polyethylene glycol)                            | General anesthesia                                                                                                                                                                                   | Early mobilization, acetaminophen, ibuprofen, oxycodone/hydromorphone, gabapentin, bowel clean, NSAIDs                                                                           |
| <i>Elbow</i>                   |                                                                                                                                  |                                                                                                                                                                                                      |                                                                                                                                                                                  |
| Cui et al. 2019 [48]           | Patient education                                                                                                                | Brachial plexus anesthesia, antibiotic prophylaxis, TXA                                                                                                                                              | Early mobilization multimodal analgesia (acetaminophen, NSAIDs, IV patient controlled, low-dose opioids), celecoxib (for 6 weeks), physical therapy and cryotherapy (for 3 days) |
| Prkić et al. 2020 [152]        | Patient education                                                                                                                | NR                                                                                                                                                                                                   | Exercise, physiotherapy, no cast, functional discharge criteria                                                                                                                  |

| <i>Hip and/or knee</i>     |                                                                                                                                                  |                                                                                                                                                                                                            |                                                                                                                                      |
|----------------------------|--------------------------------------------------------------------------------------------------------------------------------------------------|------------------------------------------------------------------------------------------------------------------------------------------------------------------------------------------------------------|--------------------------------------------------------------------------------------------------------------------------------------|
| Aasvang et al. 2016 [25]   | Opioid use (for at least 4 weeks before), multimodal analgesia (slow-release paracetamol 2 g, celecoxib 400 mg, gabapentin 600 mg, 1-2 h before) | Spinal anesthesia (1.5 ml bupivacaine 0.5%, 1-5 mg/kg/h propofol), LIA (100 ml 0.2% ropivacaine, 10 mg/ml epinephrine, 50 ml 0.2 ropivacaine)                                                              | Slow-release paracetamol 2 g, celecoxib 200 mg and gabapentin 300 mg (on the first evening after), sufentanil and morphine           |
| Ascione et al. 2020 [30]   | Patient education, information                                                                                                                   | Spinal anesthesia (2 ml hyperbaric bupivacaine 0.5%, 10 mg/ml propofol), IV TXA (500 mg), local anesthetic (150 ml ropivacaine, 10 mg/ml epinephrine), fluids, compression bandages and cooling, no drains | Early mobilization, oral medication (1 g paracetamol, 200 mg celecoxib, 300 mg gabapentin, opioids), enoxaparin 20 mg subcutaneously |
| Auyong et al. 2015 [31]    | Patient education, care companion, transdermal scopolamine patch                                                                                 | Spinal anesthesia (mepivacaine), 2 L crystalloid fluid, IV TXA (1 g), dexamethasone (4 mg)                                                                                                                 | Continuous adductor canal nerve block, physical therapy, oral analgesics (acetaminophen, NSAIDs, gabapentin, oxycodone)              |
| Bandholm et al. 2014 [33]  | Patient information                                                                                                                              | NR                                                                                                                                                                                                         | Strength training                                                                                                                    |
| Cao et al. 2020 [42]       | NR                                                                                                                                               | General or local anesthesia, intra-articular drain (prior to closure), tourniquet                                                                                                                          | Early mobilization, physiotherapy, drain removal                                                                                     |
| Castorina et al. 2018 [44] | Patient education                                                                                                                                | IV TXA 5 ml/500 mg, chirocaine 7,5 mg/ml, no drain                                                                                                                                                         | Early mobilization, elastomeric pumps infusion (betamethasone, ondansetron, ketorolac, morphine), cryotherapy                        |
| Collett et al. 2021 [47]   | Preoperative analgesia                                                                                                                           | Spinal anesthesia, minimal opioids use, bupivacaine HCl 0.25% Ketorolac 30 mg/ml Clonidine HCl                                                                                                             | Early mobilization, 30 dose of hydrocodone                                                                                           |

|                          |                                                                                                             |                                                                                                                                                                                                                                                         |                                                                                                                                                                                                  |
|--------------------------|-------------------------------------------------------------------------------------------------------------|---------------------------------------------------------------------------------------------------------------------------------------------------------------------------------------------------------------------------------------------------------|--------------------------------------------------------------------------------------------------------------------------------------------------------------------------------------------------|
|                          |                                                                                                             | 0.1 mg/ml NaCl 0.9% Liposomal bupivacaine 266 mg/20 ml                                                                                                                                                                                                  |                                                                                                                                                                                                  |
| Concina et al. 2019 [46] | IV cefazoline 2 g and TXA 15 mg/kg                                                                          | Tourniquet (300 mmHg, released before closure), suction drain, antalgic therapy (60 mL ropivacaine 7.5%, IV 1 g paracetamol every 8 h, oral oxycodone/naloxone 10/5 mg every 12 h)                                                                      | Thromboprophylaxis (enoxaparine 4000 IU, 12 h after), IV TXA 15 mg/kg (4 h after), suction drain removal (day 1)                                                                                 |
| Deiter et al. 2020 [57]  | Patient education, oral celecoxib 200 mg, oxycodone 10 mg, acetaminophen 1000 mg                            | Spinal anesthesia (1.8 mL 0.75% hyperbaric bupivacaine peri-articular infiltration), single shot ACB (20 mL 0.5% ropivacaine), 30 mL 0.5% bupivacaine, toradol 60 mg, 20 mL 0.9% normal saline                                                          | Multimodal analgesia protocol (acetaminophen 500 mg every 6 h, toradol 30 or 15 mg every 6 h, oral roxicodone 5 mg every 4 h and tramadol 50 mg every 4 h, IV dilaudid 0.5 mg), physical therapy |
| Didden et al. 2019 [60]  | Patient education and information                                                                           | LIA (ropivacaine 2% 150ml morphine-sulphate 5 mg, adrenaline 0.5 mg), spinal or general anesthesia, paracetamol 1000 mg, gabapentin 300 mg (or 100 mg $\geq 70$ years/creatinine 30–60 ml/min/1.73 m <sup>2</sup> ), naproxen 500 mg, gastric protector | Early mobilization, gabapentin (2×300 mg or 2×100 mg), paracetamol (4×1000 mg), naproxen (2×500 mg), oxycodone (immediate-release, 6×5 mg and prolonged-release, 2×10 mg), PCA                   |
| Drosos et al. 2016 [62]  | NR                                                                                                          | Spinal anesthesia, pneumatic tourniquet, IV (1 g) or topical (1 g in 30 ml normal saline) TXA, antibiotic prophylaxis, anticoagulation regime, drain                                                                                                    | Early mobilization (day 1) and drain removal (24 h after), ABT regime (if Hb < 10.0 g/dl)                                                                                                        |
| Dwyer et al. 2014 [65]   | Patient education and information, pre-assessment check, calorie and carbohydrate loading, no premedication | Spinal or epidural anesthesia (propofol), tourniquet use, PONV prevention, short-acting opiates, paracetamol, codeine, anti-                                                                                                                            | Early mobilization and nutrition, non-opiate and non-steroidal analgesia, oral fluids, thrombo- and infection prophylaxis, vitamin                                                               |



|                           |                                                                                                                                                                                                  |                                                                                                                                                                                    |                                                                                                                                                                                                                                                                        |
|---------------------------|--------------------------------------------------------------------------------------------------------------------------------------------------------------------------------------------------|------------------------------------------------------------------------------------------------------------------------------------------------------------------------------------|------------------------------------------------------------------------------------------------------------------------------------------------------------------------------------------------------------------------------------------------------------------------|
|                           |                                                                                                                                                                                                  | inflammatory analgesia, fluids, drain, no urinary catheter                                                                                                                         | supplements, drain removal (day 1)                                                                                                                                                                                                                                     |
| Fransen et al. 2018 [70]  | Premedication (paracetamol 1000 mg, temazepam 10 mg)                                                                                                                                             | General anesthesia, LIA, no steroids, tourniquet, pain pumps, drain and bladder catheter                                                                                           | Early mobilization, thromboprophylaxis (fraxiparine 2850 international units once a day for 4 weeks), paracetamol 1000 mg (4 times a day), diclofenac 50 mg (3 times a day), oral oxynorm 5 mg, ice packs                                                              |
| Gromov et al. 2019 [79]   | IV TXA (1 g)                                                                                                                                                                                     | Tissue adhesive, no drains or tourniquets                                                                                                                                          | Early mobilization, compression bandage removal, standard pain treatment, thromboprophylaxis (10 mg rivaroxaban 6-8 h prior), IV TXA (1 g, 3 h after)                                                                                                                  |
| Gromov et al. 2020 [80]   | Questionnaires, high-dose corticosteroids, IV TXA                                                                                                                                                | Spinal anesthesia, opioid-sparing multimodal analgesia, no drains                                                                                                                  | Early mobilization, thromboprophylaxis                                                                                                                                                                                                                                 |
| Higgins et al. 2020 [88]  | PES patients: assess to an online educational platform on general health information, basis of OA and joint pain, each stage of the pathway. Preoperative recording of EQ-5D Index, OKS and CACI | General anesthesia + regional nerve block reserved as a second line for patients in whom spinal was unsuitable, perioperative anticoagulation (TED stockings and enoxaparin 40 mg) | No-PES and PES: early mobilization, pain management, regular long-acting opiates with short acting opiate for pain. PES only: videos exercise, timeline activity, reminders for appointments, provider team online system, questionnaires, streamlined patient pathway |
| Hoorntje et al. 2017 [91] | Paracetamol (1 g), meloxicam (15 mg), pantoprazole (40 mg) and gabapentin (300 mg) 1 h before surgery                                                                                            | Spinal or general anesthesia, TXA (1 g) at pre-operation and at wound closure, LIA, dexamethasone (8 g)                                                                            | Early mobilization, cefazolin for 24 h, meloxicam (15 mg once daily) and paracetamol (1000 mg four times daily), oxycodone (10 mg)                                                                                                                                     |

|                           |                                                                                                                               |                                                                                                                                                                                                                                                                        |                                                                                                                                                                                                 |
|---------------------------|-------------------------------------------------------------------------------------------------------------------------------|------------------------------------------------------------------------------------------------------------------------------------------------------------------------------------------------------------------------------------------------------------------------|-------------------------------------------------------------------------------------------------------------------------------------------------------------------------------------------------|
| Husted et al. 2011a [93]  | NR                                                                                                                            | Spinal anesthesia (3 mL 0.5% (15 mg) plain bupivacaine), propofol (0.5–5 mg/kg/h) if required, TXA (1 g), LIA (300 mg ropivacaine (0.2%), epinephrine (10 mg/mL), fluid administration: 0.9% saline (5 mL/kg/h) and colloid (Voluven 7.5 mL/kg/h), compression bandage | Early mobilization, xarelto (10 mg) compression bandage removal, few h in PACU opioid-sparing analgesia (celecoxib 200 mg), acetaminophen (2 g), gabapentin (300 mg morning and 600 mg evening) |
| Jensen et al. 2020 [98]   | IV injection of 125 mg MP 30 min before surgery together with 2 g of dicloxacillin                                            | Spinal anesthesia (2 mL 0.5% hyperbaric bupivacaine) or general anaesthesia (remifentanyl and propofol), LIA (200 mL 0.2% ropivacaine), compression bandage, RX                                                                                                        | Early mobilization, paracetamol 1 g x 4 and celecoxib 200 mg x 2 daily for 7 days, no opioids, morphine 5 mg given as rescue medication, RX                                                     |
| Jensen et al. 2021 [99]   | Preoperative high-dose corticosteroids, IV TXA                                                                                | Spinal anesthesia, multimodal opioid-sparing analgesia                                                                                                                                                                                                                 | Early mobilization, thromboprophylaxis                                                                                                                                                          |
| Jiang et al. 2019 [100]   | Quadriceps exercise, knee mobility exercise, ankle pump exercise, lung function exercise, solid diet up to 2 h before surgery | Spinal (dexamethasone 4 mg) or general anesthesia, TXA (1 g), controlled blood pressure, “cocktail therapy” (0.9% sodium chloride, ropivacaine (150 mg), ketorolac (30 mg), epinephrine (0.1 mg))                                                                      | Early mobilization, multimodal oral analgesia (parecoxib 40 mg a day), early initiation of oral intake                                                                                          |
| Klement et al. 2019 [109] | Single shot FNB + LB-PAI or ACC + IPACK                                                                                       | Tourniquet, TXA or Amicar                                                                                                                                                                                                                                              | Multimodal analgesia: NSAID, gabapentinoid, analgesic/antipyretic, short acting opioid, long-acting opioid, opioid breakthrough, dexamethasone day 0 and 1                                      |
| Lamplot et al. 2014 [114] | 5 mg cumadin, vancomycin and cefazolin 60 min before surgery                                                                  | Epidural or spinal anesthesia. Multimodal group: 30 cc 0.5% bupivacaine, 10 mg MSO <sub>4</sub> and 15 mg                                                                                                                                                              | Early mobilization, IV morphine or hydromorphone. Multimodal group: oxycodone 10 mg, tramadol 50 mg, ketorolac 15 mg,                                                                           |

|                                    |                                                                                                                                        |                                                                                                                 |                                                                                                                                                               |
|------------------------------------|----------------------------------------------------------------------------------------------------------------------------------------|-----------------------------------------------------------------------------------------------------------------|---------------------------------------------------------------------------------------------------------------------------------------------------------------|
|                                    |                                                                                                                                        | ketorolac. PCA group: no periarticular injection                                                                | hydrocodone 5 mg, hydromorphone 1 mg as needed, ondansetron 4 mg, metoclopramide 10 mg. PCA group: hydromorphone 1 mg, ondansetron 4 mg, metoclopramide 10 mg |
| Larsen et al. 2012 [115]           | Screen by a nurse at the first visit                                                                                                   | Start mobilization                                                                                              | Early mobilization, analgesia: opioids, NSAID, paracetamol, discharge to home                                                                                 |
| Li et al. 2021b [122]              | Patients' information, preoperative stress relief, psychological counseling, analgesia, water and liquid food 8 h before the operation | NR                                                                                                              | Drainage tube removed within 24 h after surgery, local ice compress for 24 h at 24 h after surgery, dietary intervention, infection prophylaxis               |
| Lindberg-Larsen et al. 2017 [123]  | Screening for eligibility, enrollment, allocation                                                                                      | Spinal anesthesia, local analgesia, TXA 1 g, fluid therapy (if surgery was prolonged beyond 1 h), no tourniquet | Early mobilization, thromboprophylaxis, no ice packings or mechanical calf compression, analgesia, opioids on request                                         |
| Lindberg-Larsen et al. 2018a [124] | Screening for eligibility, enrollment, allocation                                                                                      | Spinal anesthesia, local analgesia, TXA 1 g, fluid therapy (if surgery was prolonged beyond 1 h), no tourniquet | Early mobilization, thromboprophylaxis, no ice packings or mechanical calf compression, analgesia, opioids on request                                         |
| Lindberg-Larsen et al. 2018b [125] | Screening for eligibility, enrollment, allocation                                                                                      | Spinal anesthesia, local analgesia, TXA 1 g, fluid therapy (if surgery was prolonged beyond 1 h), no tourniquet | Early mobilization, thromboprophylaxis, no ice packings or mechanical calf compression, analgesia, opioids on request                                         |

|                                   |                                                                                          |                                                                                                                                                         |                                                                                                                                    |
|-----------------------------------|------------------------------------------------------------------------------------------|---------------------------------------------------------------------------------------------------------------------------------------------------------|------------------------------------------------------------------------------------------------------------------------------------|
| Lindberg-Larsen et al. 2019 [126] | NR                                                                                       | Spinal anesthesia, TXA, opioid-sparing analgesia with acetaminophen, NSAIDs                                                                             | Early mobilization, thromboprophylaxis                                                                                             |
| Maempel et al. 2015 [129]         | Patients' assessment                                                                     | Spinal anesthesia, analgesia, TXA                                                                                                                       | Early mobilization, analgesia                                                                                                      |
| McDonald et al. 2012 [131]        | Pre-operative education, analgesia                                                       | Spinal anesthesia, TXA (2.5 g), multimodal pre-medication, catheter                                                                                     | Early mobilization, catheter remotion, multimodal analgesia, RX and routine blood test on day 2 post surgery                       |
| Munk et al. 2012 [134]            | Multidisciplinary education, multimodal pain treatment                                   | Spinal or general anesthesia, LIA, TXA (1 g), no drains, elastic compression bandage, thromboprophylaxis                                                | Early mobilization                                                                                                                 |
| Nicolaiciuc et al. 2019 [136]     | Premedication (40 mg pantozole, 500 mg naproxen, 300 mg gabapentin, 1000 mg paracetamol) | Total IV or spinal anesthesia, LIA (natropin 0.1% 2 x 50 ml with suprarenin, 1 x 50 ml without suprarenin), tourniquet in fast-track + tourniquet group | Physiotherapy (day 1), oxygesic (10 mg), naproxen (500 mg), paracetamol (1000 mg)                                                  |
| Noel et al. 2020 [137]            | Anxiolytic premedication                                                                 | Spinal anesthesia, multimodal analgesia, IV TXA (1 g), TXA 3 g injection diluted in 70 mL of NaCl 0.9% (after surgery)                                  | Early mobilization, multimodal pain management, PONV                                                                               |
| Pamilo et al. 2018 [140]          | NR                                                                                       | NR                                                                                                                                                      | NR                                                                                                                                 |
| Petersen et al. 2020b [144]       | Patient questionnaires                                                                   | Spinal anesthesia, multimodal opioid sparing analgesia                                                                                                  | Early mobilization, in-hospital thromboprophylaxis if LOS $\leq$ 5 days, no pneumatic compression devices or compression stockings |

|                                |                                                                                                          |                                                                                                                                                                |                                                                                                                                                                                                                          |
|--------------------------------|----------------------------------------------------------------------------------------------------------|----------------------------------------------------------------------------------------------------------------------------------------------------------------|--------------------------------------------------------------------------------------------------------------------------------------------------------------------------------------------------------------------------|
| Plessl et al. 2020 [149]       | Multimodal pain management                                                                               | Spinal anesthesia with a single adductor block                                                                                                                 | Early mobilization                                                                                                                                                                                                       |
| Ruiz et al. 2018 [155]         | Pre-operative education                                                                                  | Antibiotics prophylaxis, dexamethasone and TXA 30 min before incision, local analgesia, no drain or epidural catheter, compression bandage                     | Early mobilization, oral pain medication (NSAID), short acting opioid, thromboprophylaxis                                                                                                                                |
| Rytter et al. 2017 [156]       | Analgesia, antibiotics prophylaxis, and in fast-track + MP group also a single dose of MP 125 mg IV      | Spinal (90% of patients) or general (10%) anesthesia, no drains, analgesia, TXA, compression bandage, cooling device                                           | Early mobilization, thromboprophylaxis, paracetamol, celecoxib, gabapentin, and morphine for pain                                                                                                                        |
| Saku et al. 2019 [157]         | Pre-operative education                                                                                  | General (9%) and local (91%) anesthesia, analgesia (ropivacaine, adrenalin, ketorolac), TXA                                                                    | Early mobilization, discharge pain medication, thromboprophylaxis                                                                                                                                                        |
| Schotanus et al. 2017 [159]    | Fast-track group: admission night before/day of surgery. Fast-track group + OS: admission day of surgery | Fast-track group: IV prophylactic antibiotics, adrenaline, dexamethasone, TXA. Fast-track group + OS: IV and oral prophylactic antibiotics, dexamethasone, TXA | Fast-track group: first mobilization < 6 h, compression bandages 24 h postoperative. Fast-track group + OS: first mobilization < 4 h, compression bandages 8 h postoperative, first 4 days postoperative elastic bandage |
| Skovgaard et al. 2013 [161]    | Preoperative cefuroxime, TXA, local analgesia                                                            | Spinal anesthesia, light sedation, fluid administration, transfusion if Hb < 6.0 mmol/L, drains for 24 h                                                       | Early mobilization, multimodal opioid sparing, oral analgesia                                                                                                                                                            |
| van den Belt et al. 2015 [174] | Preoperative information and online “knee portal”                                                        | Spinal anesthesia, analgesia, no drain, thromboprophylaxis                                                                                                     | Early mobilization, antibiotics, multimodal pain control medication, compression bandage                                                                                                                                 |
| Van Egmond et al. 2015 [175]   | Preoperative education                                                                                   | Spinal anesthesia with local infiltration anesthesia, pain                                                                                                     | Early mobilization                                                                                                                                                                                                       |

|                                |                                                                                                                                                                                       |                                                                                                                                                                                        |                                                                                                            |
|--------------------------------|---------------------------------------------------------------------------------------------------------------------------------------------------------------------------------------|----------------------------------------------------------------------------------------------------------------------------------------------------------------------------------------|------------------------------------------------------------------------------------------------------------|
|                                |                                                                                                                                                                                       | medication, opioid medication only on request, no drains, no urine catheters                                                                                                           |                                                                                                            |
| Wang et al. 2018a [21]         | Pre-op education, medical risks evaluation, high protein diet and multivitamin supplements, carbohydrate-rich drinks on the night before and of the morning of surgery, TXA (group A) | Stop to solid food for 6 h or clear fluids for 2 h prior to surgery, general anesthesia, multimodal analgesia, thromboprophylaxis                                                      | Early mobilization, TXA (group B, C, D)                                                                    |
| Wang et al. 2018b [22]         | Pre-op education, standard analgesia                                                                                                                                                  | General anesthesia, multimodal analgesia, TXA, antibiotic prophylaxis, no tourniquet, IA drainage, pressure dressing, thromboprophylaxis                                               | Post-op laboratory values, TXA                                                                             |
| Wang et al. 2019 [23]          | Pre-op education, standard analgesia, doppler ultrasound                                                                                                                              | General anesthesia, no tourniquet, drains, pressure dressing, thromboprophylaxis, TXA                                                                                                  | Early mobilization, doppler ultrasound, patient satisfaction questionnaire, TXA                            |
| Wied et al. 2015 [182]         | TXA (1 g)                                                                                                                                                                             | Spinal analgesia, plugging of the femoral medullary canal, local analgesia, no drains                                                                                                  | Early mobilization, multimodal oral opioid sparing, analgesia, paracetamol, gabapentin, thromboprophylaxis |
| Wynell-Mayow et al. 2018 [184] | NR                                                                                                                                                                                    | General or spinal anesthesia, multimodal analgesia                                                                                                                                     | Multimodal analgesia                                                                                       |
| Yu et al. 2018 [189]           | Pre-op education                                                                                                                                                                      | IV TXA 5-10 min before skin incision (20 mg/kg) and 3, 6 h later (1 g) along with 1 g of topical TXA in 50 mL of normal saline solution, no tourniquet or drains, multimodal analgesia | Cold pack on surgical site, dexamethasone, multimodal analgesia, thromboprophylaxis                        |
| Zietek et al. 2015 [191]       | Pre-op education                                                                                                                                                                      | Spinal anesthesia, multimodal analgesia, thromboprophylaxis                                                                                                                            | Early mobilization, multimodal analgesia, cold compression band                                            |

|                                 |                                                                                                                                                                                  |                                                                                                                                                                                                                                           |                                                                                                                                                                                     |
|---------------------------------|----------------------------------------------------------------------------------------------------------------------------------------------------------------------------------|-------------------------------------------------------------------------------------------------------------------------------------------------------------------------------------------------------------------------------------------|-------------------------------------------------------------------------------------------------------------------------------------------------------------------------------------|
| Zietek et al. 2016 [192]        | NR                                                                                                                                                                               | Spinal anesthesia, analgesia, cold compression bandages                                                                                                                                                                                   | Early mobilization, multimodal post-operative analgesia                                                                                                                             |
| Bernaus et al. 2021 [37]        | Anesthetist, blood-saving programme, patient education, antibiotic prophylaxis, oral multimodal analgesia (5 mg diazepam, 20 mg omeprazole, 200 mg celecoxib, 1 g acetaminophen) | Spinal anesthesia (bupivacaine 0.5% 10-12 mg), IV TXA (15 mg/kg), 8 mg dexamethasone, 40 mg omeprazole, LIA (ropivacaine 0.2%, epinephrine 0.5 µ/ml or saline), no drains                                                                 | Early mobilization, oral multimodal analgesia (celecoxib 200 mg/12 h, acetaminophen 1 g/8 h, sevredol 10 mg)                                                                        |
| Berthelsen et al. 2017 [38]     | Rehabilitation preparation, case manager, information                                                                                                                            | NR                                                                                                                                                                                                                                        | NR                                                                                                                                                                                  |
| Birznies et al. 2019 [39]       | Dexamethasonum 8 mg                                                                                                                                                              | Spinal anesthesia (70 mg prilocaine or 18 mg bupivacaine), TXA 1 g, cefazolinum 2 g, infusion (1200 ml crystalloids and 500 ml colloids), LIA 100 ml (ropivacaine 0.75% diluted with 0.9% NaCl), bemiparinum 3500 DV, rivaroxabanum 10 mg | Early rehabilitation, multimodal analgesia (acetaminophen 1 g-500 mg, etoricoxibum 90 mg, morphine 30 mg), TXA                                                                      |
| D'Amato et al. 2019 [49]        | Check-up with anesthesiologist, epidural chirocaine 0,75% 40 mg, morphine 2 mg, atropine 0,13 mg, PONV prevention                                                                | Spinal-epidural anesthesia (chirocaine 0,25% 7 mg)                                                                                                                                                                                        | Tapentadol (100 mg/twice-daily for 4 days) or oxycodone/naloxone (10 mg/5 mg) plus ketoprofen (100 mg/ twice daily), supplemental analgesia (paracetamol 1 g or morphine 0,1 mg/kg) |
| Dawson-Bowling et al. 2014 [53] | Patients' education and information                                                                                                                                              | Low-dose spinal, plus light general anesthesia (1.5 ml 0.25% bupivacaine, 300 µg diamorphine), drains                                                                                                                                     | Early mobilization, antiemesis, early oral fluid intake, IV cannulae removal, paracetamol, codeine, diclofenac, tramadol, drains removal, RX, Hb check, thromboprophylaxis          |

|                                |                                                                                                                                   |                                                                                                                                                             |                                                                                                                                                                                                                  |
|--------------------------------|-----------------------------------------------------------------------------------------------------------------------------------|-------------------------------------------------------------------------------------------------------------------------------------------------------------|------------------------------------------------------------------------------------------------------------------------------------------------------------------------------------------------------------------|
| De Ladoucette et al. 2020 [54] | Patient information, modern fasting, opioid-sparing multimodal analgesia, high single-dose corticosteroid                         | Peri-articular injection of local anesthesia (ropivacaine), drain                                                                                           | Early mobilization, thromboprophylaxis, new clinical examination and RX work-up                                                                                                                                  |
| den Hartog et al. 2017 [59]    | Patient education, oral acetaminophen 1000 mg, celecoxib 400 mg, gabapentin 600 mg, IV dexamethasone 0.15 mg/kg, esketamine 15 mg | Spinal anesthesia (low-dose bupivacaine 6-8 mg intrathecally, propofol, esketamine single shot)                                                             | Early mobilization, oral acetaminophen 1000 mg, gabapentin 300 mg, tramadol 100 mg, celecoxib 200 mg (for 2 weeks)                                                                                               |
| den Hartog et al. 2015 [58]    | NR                                                                                                                                | Spinal anesthesia                                                                                                                                           | Early mobilization                                                                                                                                                                                               |
| Ding et al. 2020 [61]          | Patient education, physical therapies, high-protein diet, sleep and fluid management, preemptive analgesia, Hb <70 or 70–100 g/L  | General anesthesia, IV fluid (<1500 ml), local infiltration anesthesia, TXA, hypotension control, antibiotic- and thromboprophylaxis, no drain and catheter | Early mobilization, opioid-sparing multimodal analgesia, thrombo- and PONV prophylaxis, anemia management                                                                                                        |
| Dwyer et al. 2012 [64]         | Patient education and information, pre-assessment check, calorie and carbohydrate loading, no premedication                       | Spinal or epidural anesthesia (propofol), drain, no urinary catheter                                                                                        | Early mobilization, non-opiate and non-steroidal analgesia, early oral nutrition, oral fluids and protein and carbohydrate-rich drinks, pneumatic intermittent calf compression, enoxaparin 40 mg, drain removal |
| Füssenich et al. 2020 [72]     | Patient education and information                                                                                                 | Thromboprophylaxis, physiotherapy, ergotherapy, pain management, pressure bandage, RX                                                                       | Early mobilization, pressure bandage removal and ergotherapy, blood examination, medication and pain killers, outpatient consult, RX                                                                             |
| Gomez et al. 2019 [75]         | NR                                                                                                                                | General anesthesia and FNB                                                                                                                                  | Early mobilization and nutrition, RX                                                                                                                                                                             |



|                          |                                                                                                                                                                                                            |                                                                                                                                                                                                               |                                                                                                                                                                                                                       |
|--------------------------|------------------------------------------------------------------------------------------------------------------------------------------------------------------------------------------------------------|---------------------------------------------------------------------------------------------------------------------------------------------------------------------------------------------------------------|-----------------------------------------------------------------------------------------------------------------------------------------------------------------------------------------------------------------------|
| Gomez et al. 2020 [76]   | NR                                                                                                                                                                                                         | General anesthesia and FNB                                                                                                                                                                                    | Early mobilization and nutrition, RX                                                                                                                                                                                  |
| Götz et al. 2021 [77]    | Patient education, pre-emptive NSAIDs (etoricoxib 90 mg 1 h before)                                                                                                                                        | Spinal anesthesia (prilocaine 1% hyperbaric 4 ml = 80 mg and sufentanil 10 µg), IV dexamethasone (8 mg), LIA, subcutaneous 200 mg ropivacaine and 0.5 mg adrenalin, TXA (1 g IV and 2 g topically), no drains | Early mobilization, cardiovascular stimulating and thromboprophylaxis exercises, 3 mg piritramide, analgesia (oral ibuprofen 600 mg 3 times daily, metamizole 500 mg 4 times daily, tramadol 100 mg, oxycodone 10 mg) |
| Gromov et al. 2015 [78]  | NR                                                                                                                                                                                                         | General anesthesia                                                                                                                                                                                            | NR                                                                                                                                                                                                                    |
| Gupta et al. 2014 [81]   | Patient education and information, geriatric and nutritional assessment, thromboprophylaxis, IV fluids, pressure sore prevention, bowel/bladder care and prophylactic antibiotic regimes, oral supplements | NR                                                                                                                                                                                                            | Early mobilization and rehabilitation                                                                                                                                                                                 |
| Hansson et al. 2015 [83] | Inclusion in fast-track system made by ambulance nurse/paramedic when arriving patient                                                                                                                     | NR                                                                                                                                                                                                            | General and local complications evaluation                                                                                                                                                                            |
| Hartog et al. 2015 [84]  | Oral paracetamol (acetaminophen) 1000 mg, celecoxib 400 mg, omeprazole 20 mg once a day, gabapentin 600 mg, IV dexamethasone 0.15 mg/kg, esketamine 15 mg, PROMs, EQ-5D and NRS                            | Spinal anesthesia (bupivacaine 6-8 mg)                                                                                                                                                                        | Oral paracetamol 1000 mg, gabapentin 300 mg, oxycodone (OxyContin) 10 mg, celecoxib (Celebrex) 200 mg, piritramide (Dipidolor) 10 mg intra-muscular                                                                   |

|                             |                                                                                                                              |                                                                                                                                           |                                                                                                                                                   |
|-----------------------------|------------------------------------------------------------------------------------------------------------------------------|-------------------------------------------------------------------------------------------------------------------------------------------|---------------------------------------------------------------------------------------------------------------------------------------------------|
| Herndon et al. 2020 [87]    | NR                                                                                                                           | Spinal anesthesia (chloroprocaine 60 mg or bupivacaine 8-15 mg)                                                                           | Multimodal analgesia protocol (NSAIDs, gabapentin, acetaminophen, narcotics)                                                                      |
| Huang et al. 2021 [92]      | Health and rehabilitation education, laboratory tests, comorbidity consultations, infection prophylaxis, multimode analgesia | Spinal anesthesia, blood-sparing strategies, no drain, compression bandages                                                               | Early mobilization, thromboprophylaxis                                                                                                            |
| Imbelloni et al. 2014 [96]  | Pre-anesthetic interview                                                                                                     | Spinal anesthesia or 7.5-10 mg, tenoxicam 40 mg and dipyrone 40 mg/kg in 50 mL of Ringer's lactate)                                       | Analgesia, 40 mL bupivacaine 0.25%, tenoxicam 20 mg/12 h, dipyrone 1 g and cefazolin 1 g every 6 h                                                |
| Kang et al. 2019 [105]      | Educational program, oral multimodal analgesia (400 mg celecoxib 1 h before, 200 mg for patients > 70 age)                   | Opioid-free short-acting spinal anesthesia (mepivacaine), IV TXA (1 g), dexamethasone 8 mg, 40 mg parecoxib sodium, 2 L lactated Ringer's | Early mobilization, opioid-sparing analgesia (celecoxib 200 mg, two times a day), tramadol (100-200 mg up to two times a day), PONV               |
| Klapwijk et al. 2017 [108]  | NR                                                                                                                           | NR                                                                                                                                        | Questionnaires (HOOS-PS, OHS, EQ-5D, SF-12, ICOAP), LMWE (once a day for 4 weeks)                                                                 |
| Kolodziej et al. 2020 [110] | IV biofazolin 1-2 g, TXA 15 mg/kg                                                                                            | Spinal epidural anesthesia (Marcaine Spinal 0.5% Heavy-bupivacaine hydrochloride), venous thromboprophylaxis                              | Early mobilization, thromboprophylaxis, analgesic regimen (ketoprofen 100 mg every 12 h, IV paracetamol 1.0 g every 6 h, oral 50–100 mg tramadol) |
| Larsson et al. 2016 [116]   | RX                                                                                                                           | NR                                                                                                                                        | NR                                                                                                                                                |
| Leiss et al. 2021 [117]     | Gait training with crutches, multidisciplinary lecture, etoricoxib 90 mg 1 h before                                          | Spinal anesthesia (prilocaine 1% hyperbaric 4 mL = 80 mg, sufentanil 10 µg, dexamethasone 8 mg IV), TXA                                   | Early mobilization, standardized pain management                                                                                                  |

|                             |                                                                                                                |                                                                                       |                                                                                                                                                                                    |
|-----------------------------|----------------------------------------------------------------------------------------------------------------|---------------------------------------------------------------------------------------|------------------------------------------------------------------------------------------------------------------------------------------------------------------------------------|
|                             |                                                                                                                | (2 g topically and 1 g IV), LIA (200 mg ropivacaine, 0.5 mg adrenalin), no drain      |                                                                                                                                                                                    |
| Li et al. 2020b [120]       | Psychological counseling, nutrition and anemia evaluation, fasting and water, PONV prophylaxis                 | Urinary catheter, drain                                                               | Early mobilization, multimodal analgesia (ropivacaine 2.0 mg/ml, IV NSAIDs, flurbiprofen 2 mg/kg, dexibuprofen)                                                                    |
| Mikkelsen et al. 2014 [133] | Patient information                                                                                            | Spinal anesthesia, multimodal pain management                                         | Enforced mobilization and nutrition                                                                                                                                                |
| Okamoto et al. 2016 [138]   | NR                                                                                                             | Spinal anesthesia                                                                     | Early mobilization                                                                                                                                                                 |
| Otte et al. 2011 [139]      | Patient education, pain management (gabapentin 600 mg, slow-release acetaminophen 2 g, celecoxib 400 mg)       | Spinal anesthesia (3 ml isobaric bupivacaine 0.5%), IV TXA (1 g) and 1.5 g cefuroxime | Early mobilization, thromboprophylaxis, oral pain management (slow-release 1-2 g/6-12 h acetaminophen, gabapentin 300-600 mg, celecoxib 200 mg/12 h and 5 mg oxycodone on request) |
| Pollmann et al. 2016 [150]  | IV fluids, oxygen, pain relief, ECG, opiate sparing, fluid treatment, transfusion-triggers, thromboprophylaxis | Spinal or general anesthesia                                                          | Early mobilization, opiate sparing, fluid treatment, transfusion-triggers, thromboprophylaxis                                                                                      |
| Porsius et al. 2018 [151]   | Patient questionnaires                                                                                         | NR                                                                                    | Early mobilization, pain relief, questionnaires                                                                                                                                    |
| Specht et al. 2011 [165]    | NR                                                                                                             | Combined spinal anesthesia and light general anesthesia, catheter                     | Oral pain treatment, catheter removal, 51 mL LIA injected through the catheter in fast-track with LIA + LINFA group                                                                |

|                             |                                                                                                                                                                                                                                    |                                                                                                                                                                                  |                                                                                                                                                          |
|-----------------------------|------------------------------------------------------------------------------------------------------------------------------------------------------------------------------------------------------------------------------------|----------------------------------------------------------------------------------------------------------------------------------------------------------------------------------|----------------------------------------------------------------------------------------------------------------------------------------------------------|
| Talboy et al. 2016 [170]    | Oral paracetamol, tramadol                                                                                                                                                                                                         | Spinal anesthesia (bupivacaine), no intrathecal opiates, sedation, light general anesthesia, ondansetron, dexamethasone, diclofenac, IV fluid (1000 ml), peri-articular catheter | Analgesic, liquid, PONV                                                                                                                                  |
| Tan et al. 2018 [171]       | Multidisciplinary patient information                                                                                                                                                                                              | Local anesthesia, multimodal analgesia, NSAIDs or COX-2 inhibitor, TXA, no drains and catheters                                                                                  | Early mobilization                                                                                                                                       |
| Temporiti et al. 2020 [172] | NR                                                                                                                                                                                                                                 | NR                                                                                                                                                                               | Mobilization and walking the day of surgery or the day after surgery                                                                                     |
| Vesterby et al. 2017 [179]  | Patient information                                                                                                                                                                                                                | NR                                                                                                                                                                               | Early mobilization                                                                                                                                       |
| Xie et al. 2019 [185]       | Doppler ultrasound, comorbidity assessment, oral carbohydrate treatment                                                                                                                                                            | General or spinal or combined spinal-epidural anesthesia, IV TXA 15 mg/kg, NSAIDs, physical prophylaxis, chemoprophylaxis, fluid therapy                                         | Early mobilization                                                                                                                                       |
| Zhang et al. 2020 [190]     | Patient information, antibiotics prophylaxis, glucose drink                                                                                                                                                                        | Local or general anesthesia, catheter, antibiotics                                                                                                                               | Early mobilization, 50-100 mL warm water, liquid-semi-fluid soft food-normal diet, analgesia                                                             |
| Adams et al. 2021 [26]      | Patient education, cardiology and orthopedic consultation, anesthesia evaluation, chlorhexidine washes, mupirocin antibiotic ointment to nares, analgesic regimen (300-600 mg gabapentin, 200 mg celecoxib, 1000 mg acetaminophen) | Spinal or general anesthesia                                                                                                                                                     | Analgesic regimen (celecoxib, acetaminophen, tramadol, oxycodone), 81 mg aspirin or 2.5 mg apixaban, thromboprophylaxis, outpatient urological follow-up |

|                              |                                                                                                                                    |                                                                                                                  |                                                                                                                                                                        |
|------------------------------|------------------------------------------------------------------------------------------------------------------------------------|------------------------------------------------------------------------------------------------------------------|------------------------------------------------------------------------------------------------------------------------------------------------------------------------|
| Alvis et al. 2021 [28]       | Analgesia (acetaminophen, meloxicam, gabapentin)                                                                                   | Analgesia (ropivacaine, epinephrine, ketorolac)                                                                  | Analgesia (acetaminophen, gabapentin, meloxicam, oxycodone), PONV, fluid administration, rehabilitation                                                                |
| Andreasen et al. 2017 [29]   | Information, multidisciplinary symposium                                                                                           | Spinal anesthesia, TXA, LIA, no drains                                                                           | Early mobilization, opioid-sparing multimodal analgesia, RX                                                                                                            |
| Awada et al. 2019 [32]       | Information, cognitive tests, LIA (2 g slow-release acetaminophen, 600 mg ibuprofen, 600 mg gabapentin), 125 mg methylprednisolone | Spinal or general anesthesia                                                                                     | Early mobilization, opioid-sparing multimodal analgesia (acetaminophen 2 g/12 h, ibuprofen 600 mg/12 h, gabapentin 300 mg morning and 600 mg evening), cognitive tests |
| Berg et al. 2018 [34]        | Information                                                                                                                        | Spinal anesthesia, LIA, TXA, antithrombotic prophylaxis (cloxacillin), no drains                                 | Early mobilization (within 3-6 h after)                                                                                                                                |
| Berg et al. 2020 [35]        | NR                                                                                                                                 | NR                                                                                                               | Early mobilization                                                                                                                                                     |
| Berg et al. 2021 [36]        | Oral and written information, admission on the day of surgery                                                                      | Spinal anesthesia without opioids, multimodal analgesia                                                          | Early mobilization                                                                                                                                                     |
| Bjerregaard et al. 2015 [40] | NR                                                                                                                                 | Low-dose spinal or general anesthesia, fluid restrictive, LIA, urinary catheter in fast-track catheterized group | Opioid-sparing multimodal analgesia, early mobilization                                                                                                                |
| Bjerregaard et al. 2016 [41] | NR                                                                                                                                 | Low-dose spinal or general anesthesia, fluid, LIA                                                                | Early mobilization, opioid-sparing multimodal analgesia                                                                                                                |
| Castle et al. 2021 [43]      | Patient education                                                                                                                  | Regional adductor canal nerve blocks for KA                                                                      | Early mobilization, physiotherapy, oral pain medications                                                                                                               |
| Christelis et al. 2015 [45]  | Consulting, preadmission review, minimal fasting (clear oral fluids up to 2 h before and carbohydrate                              | Spinal (not epidural) and local anesthesia (LIA or FNB), IV morphine ( $\leq 10$ mg), no excessive IV            | Early mobilization, multimodal analgesia (oral NSAIDs or COX-2                                                                                                         |

|                             |                                                                                                                                                       |                                                                                                                                                                                                                                                                                                                                                                                                                |                                                                                                                                                                                                  |
|-----------------------------|-------------------------------------------------------------------------------------------------------------------------------------------------------|----------------------------------------------------------------------------------------------------------------------------------------------------------------------------------------------------------------------------------------------------------------------------------------------------------------------------------------------------------------------------------------------------------------|--------------------------------------------------------------------------------------------------------------------------------------------------------------------------------------------------|
|                             | loading), no sedative premedication, pre-emptive analgesia (paracetamol, gabapentinoids)                                                              | fluids, active warming, antiemetic prophylaxis                                                                                                                                                                                                                                                                                                                                                                 | inhibitor), early carbohydrate supplementation                                                                                                                                                   |
| Davies et al. 2018 [52]     | TXA                                                                                                                                                   | Spinal and/or general anesthesia                                                                                                                                                                                                                                                                                                                                                                               | NR                                                                                                                                                                                               |
| Drosos et al. 2020 [63]     | Preadmission clinic (exercises), blood management program (Hb < 12 gr/dL), antibiotic prophylaxis (cefazolin sodium), anticoagulation protocol (LMWE) | Spinal or general anesthesia, TXA (2 g in 100 ml normal saline locally applied), transfusion trigger of 9 g/dL                                                                                                                                                                                                                                                                                                 | Early mobilization, opioid-sparing analgesia (gabapentinoids), LIA (ropivacaine 1% 3 mg/kg), paracetamol, NSAIDs                                                                                 |
| Fenelon et al. 2018 [66]    | IV TXA and cefuroxime                                                                                                                                 | Spinal anesthesia, enoxaparin and rivaroxaban, tourniquet (for TKA), no drain, two units of blood (if Hb < 12 g/dl)                                                                                                                                                                                                                                                                                            | Early mobilization                                                                                                                                                                               |
| Frassanito et al. 2020 [71] | Pre-habilitation programs, information, selective bowel preparation, no premedication, minimal fasting and carbohydrate loading                       | Spinal or general anesthesia, morphine 100 mcg or sufentanil 2.5–5 mcg or LIA (ropivacaine, ketorolac, epinephrine) or peripheral nerve block (ropivacaine), tourniquet, normothermia, antimicrobial (cefazolin or clindamycin and vancomycin) and antiemetic prophylaxis (dexamethasone 4mg and ondansetron 4mg), analgesia (paracetamol and ketoprofen), TXA (20 mg/kg), PONV, no urinary catheter and drain | Early mobilization, opioid-sparing multimodal analgesia (oral paracetamol 1 g, celecoxib 200 mg, oxycodone 5-10 mg and tramadol 100 mg/ml), early oral fluids and solids intake, RX, blood tests |
| Galbraith et al. 2017 [73]  | Patient education and information, paracetamol, gabapentin, COX-2 inhibitor                                                                           | Spinal anesthesia, femoral tourniquet, TXA (1 g, 15 min prior), LIA (50 ml 0.2% ropivacaine and 120-150 ml                                                                                                                                                                                                                                                                                                     | Early mobilization                                                                                                                                                                               |

|                          |                                                                                                                          |                                                                                                                                                                                    |                                                                                                                                                                                                                                        |
|--------------------------|--------------------------------------------------------------------------------------------------------------------------|------------------------------------------------------------------------------------------------------------------------------------------------------------------------------------|----------------------------------------------------------------------------------------------------------------------------------------------------------------------------------------------------------------------------------------|
|                          |                                                                                                                          | ropivacaine 0.2% + 10 µg/ml epinephrine), no drain                                                                                                                                 |                                                                                                                                                                                                                                        |
| Glassou et al. 2014 [74] | Information                                                                                                              | Spinal anesthesia, LIA, fluid therapy, blood-sparing strategies, no drain, compression bandages, cooling                                                                           | Early mobilization, thromboprophylaxis, opioid-sparing multimodal analgesia                                                                                                                                                            |
| Halawi et al. 2019 [82]  | Preemptive analgesia: 200 mg celecoxib (or meloxicam 15 mg), 5-10 mg oxycodone every 4 h, 975 mg acetaminophen every 8 h | General or combined spinal/general anesthesia, no catheter placement or catheter placement, opioid requirements, local analgesia                                                   | Opioid requirements, bladder scan (catheterization if > 350 cc; < 350 cc repetition of bladder scan in 2 h), calculation of the maintenance fluid                                                                                      |
| Holm et al. 2014 [89]    | Multidisciplinary education, oral gabapentin (600 mg), paracetamol (2 g), celecoxib (200 mg) or todolac (200 mg)         | Lumbar spinal anesthesia (12.5 mg isobaric bupivacaine 0.5% for THA and 7.5 mg hyperbaric bupivacaine 0.5% for TKA), cefuroxime (1.5 g) and TXA (1 g) 15 min before, LIA (for TKA) | Early mobilization oral morphine 10 mg (if VAS > 50 mm)                                                                                                                                                                                |
| Husted et al. 2016 [95]  | NR                                                                                                                       | Spinal anesthesia, TXA, LIA, no drains                                                                                                                                             | Early mobilization, opioid-sparing multimodal analgesia, fixed functional discharged criteria, discharge directly to home                                                                                                              |
| Husted et al. 2012 [94]  | NR                                                                                                                       | NR                                                                                                                                                                                 | NR                                                                                                                                                                                                                                     |
| Husted et al. 2011b [12] | Multidisciplinary seminar, no extended prophylaxis                                                                       | Spinal anesthesia (1.5–2.5 mL 0.5% hyperbaric or plain bupivacaine), LIA (0.9 % saline 5 mL/kg/h, colloid Voluven 7.5 mL/kg/h), TXA (1 g)                                          | Transfer to PACU after 1-2 h, encouragement to ambulate upon arrival, physiotherapy, opioid-sparing analgesia (COX-2 inhibitor celecoxib 200 mg/12 h, paracetamol slow release 2 g/12 h, gabapentin 300 mg morning and 600 mg evening) |

|                              |                                                                                                                                                                                                          |                                                                                                                                                                           |                                                                                                                                                                                                                                                |
|------------------------------|----------------------------------------------------------------------------------------------------------------------------------------------------------------------------------------------------------|---------------------------------------------------------------------------------------------------------------------------------------------------------------------------|------------------------------------------------------------------------------------------------------------------------------------------------------------------------------------------------------------------------------------------------|
| Jørgensen et al. 2021 [103]  | NR                                                                                                                                                                                                       | High dose MP (125 mg) with peripheral nerve blocks (at discretion of anaesthesiologist)                                                                                   | Functional discharge criteria                                                                                                                                                                                                                  |
| Jørgensen et al. 2017 [102]  | Questionnaire on comorbidity                                                                                                                                                                             | Multimodal analgesic protocol (MP 125 mg)                                                                                                                                 | NR                                                                                                                                                                                                                                             |
| Jørgensen et al. 2013b [101] | NR                                                                                                                                                                                                       | NR                                                                                                                                                                        | NR                                                                                                                                                                                                                                             |
| Jørgensen et al. 2013a [24]  | NR                                                                                                                                                                                                       | Spinal anesthesia, opioid-sparing multimodal analgesia, no peripheral nerve blocks                                                                                        | Early mobilization, functional discharge criteria, discharge to home                                                                                                                                                                           |
| Jenny et al. 2020 [97]       | Antithrombotic prophylaxis (LMWE or similar molecules for 85% patients, DOACs for 15%)                                                                                                                   | TXA injection (82% patients)                                                                                                                                              | Early mobilization                                                                                                                                                                                                                             |
| Krenk et al. 2014 [113]      | Patient information (surgical procedure, analgesia, anesthesia, LOS, physiotherapy), VVLT, concept shifting and stroop color word test, letter digit coding task, screening for sleep apnea and dementia | Spinal anesthesia without opioid, ephedrine 5-10 mg or phenylephrine 0.1 mg (if arterial blood pressure < 25% of baseline, and systolic blood pressure kept > 80-90 mmHg) | Early mobilization, paracetamol, NSAIDs (tramadol, oxycodone, or morphine), VVLT, concept shifting test, stroop color word test, letter digit coding task, questionnaire on comorbidities, daily medication, educational status, sleep pattern |
| Krenk et al. 2012 [112]      | Patient information                                                                                                                                                                                      | Spinal and general anesthesia                                                                                                                                             | Early mobilization, pain regime (paracetamol 1 g every 6 h, gabapentin 300 mg morning and 600 mg evening, tramadol 50 mg every 6 h, celecoxib 200 mg every 12 h, ibuprofen 400 mg every 8 h, morphine 5 mg)                                    |
| Kort et al. 2018 [111]       | Bladder volumes monitoring, oral TXA (1 g if weight < 100 kg, 1.5 g                                                                                                                                      | Spinal or general anesthesia, IV fluid restriction (1000 mL), LIA, IV                                                                                                     | Early mobilization, catheter removal (day 1), bladder volume                                                                                                                                                                                   |



|                                |                                                                                                                                                                                                                                         |                                                                                                                                                                                          |                                                                                                                                                                                                            |
|--------------------------------|-----------------------------------------------------------------------------------------------------------------------------------------------------------------------------------------------------------------------------------------|------------------------------------------------------------------------------------------------------------------------------------------------------------------------------------------|------------------------------------------------------------------------------------------------------------------------------------------------------------------------------------------------------------|
|                                | if weight > 100 kg), opioid-sparing pain protocol (meloxicam 15 mg, paracetamol 1 g, gabapentine 600 mg, pantoprazole 40 mg)                                                                                                            | dexamethasone (8 mg), oral TXA (1 g if weight < 100 kg, 1.5 g if weight > 100 kg)                                                                                                        | monitoring, no wound drains, opioid-sparing pain protocol (meloxicam 15 mg, paracetamol 1 g, gabapentine 300 mg and pantoprazole 40 mg)                                                                    |
| Kerr et al. 2017 [106]         | Pre-assessment                                                                                                                                                                                                                          | Anesthesia, IV broad spectrum antibiotics                                                                                                                                                | Early mobilization, physiotherapy, IV antibiotics and venous thromboprophylaxis                                                                                                                            |
| Lovecchio et al. 2016 [127]    | NR                                                                                                                                                                                                                                      | NR                                                                                                                                                                                       | NR                                                                                                                                                                                                         |
| Machin et al. 2013 [128]       | Oral gabapentin 300 mg (the night and 2 h before)                                                                                                                                                                                       | Gabapentin 300 mg, 30 mg lansoprazole, 5–10 mg OxyContin, spinal anesthesia and light general anaesthetic, LIA (50 ml 0.25% levobupivacaine, 30 mg ketorolac, 0.5 ml 1:1,000 adrenaline) | 20 ml levobupivacaine 0.25%, 0.5 ml 1:1,000 adrenaline diluted up to 40 ml with 0.9% saline (16-20 h after), analgesia (paracetamol, ibuprofen, 5–20 mg OxyContin twice daily for 3 days, OxyNorm and PCA) |
| Mementsoudis et al. 2020 [132] | Fast-track components: (1) regional anesthesia use; (2) multimodal analgesia use; (3) TXA; (4) anti-emetics use (day 0); (5) steroid use (day 0); (6) physical therapy (day 0 or 1); avoidance (7) wound drains or (8) urinary catheter |                                                                                                                                                                                          |                                                                                                                                                                                                            |
| Petersen et al. 2017 [141]     | Patient questionnaires                                                                                                                                                                                                                  | Spinal anesthesia, multimodal opioid-sparing analgesia without peripheral nerve blocks                                                                                                   | Early mobilization functional discharge criteria                                                                                                                                                           |
| Petersen et al. 2019 [142]     | Patient questionnaires                                                                                                                                                                                                                  | Local anesthesia, multimodal opioid sparing analgesia                                                                                                                                    | Early mobilization, in-hospital thromboprophylaxis if LOS ≤ 5 days, functional discharge criteria                                                                                                          |
| Petersen et al. 2020a [143]    | Patient information and education                                                                                                                                                                                                       | Spinal anesthesia, multimodal opioid sparing analgesia                                                                                                                                   | Early mobilization, in hospital thromboprophylaxis if LOS ≤ 5 days, functional criteria evaluation                                                                                                         |

|                             |                                                                                                                             |                                                                                                                                                                                                                              |                                                                                                                                                                                                                                           |
|-----------------------------|-----------------------------------------------------------------------------------------------------------------------------|------------------------------------------------------------------------------------------------------------------------------------------------------------------------------------------------------------------------------|-------------------------------------------------------------------------------------------------------------------------------------------------------------------------------------------------------------------------------------------|
| Petersen et al. 2021 [145]  | NR                                                                                                                          | Multimodal opioid-sparing analgesia                                                                                                                                                                                          | Early mobilization, thromboprophylaxis if LOS $\leq$ 5 days, functional discharge criteria evaluation                                                                                                                                     |
| Pitter et al. 2016 [147]    | Self-completed questionnaires, comorbidity evaluation                                                                       | Neuroaxial anesthesia, opioid-sparing analgesia, NSAIDs                                                                                                                                                                      | Early mobilization                                                                                                                                                                                                                        |
| Plenge et al. 2020 [148]    | Assessment in an optimization clinic, multidisciplinary education and full-body antiseptic wash                             | Peripheral nerve block and/or local infiltration analgesia, antimicrobial prophylaxis, TXA, prevention of perioperative blood loss with anti-fibrinolytics and normothermia                                                  | Early mobilization, multimodal opioid-sparing analgesia with paracetamol and NSAIDs on the first 3 days                                                                                                                                   |
| Robinson et al. 2014 [153]  | Pre-op education                                                                                                            | Spinal or general, anesthesia, TXA, no drains                                                                                                                                                                                | Early mobilization, paracetamol 4 times a day with a weak opiate 4 times a day and diclofenac 3 times a day, morphine and weak opiates as required                                                                                        |
| Romano et al. 2021 [154]    | Education and counseling, comorbidities evaluation, minimal pre-op fasting, pre-emptive oral analgesia (oxycodone naloxone) | Selective subarachnoid anesthesia, local analgesia, short-acting sedative hypnotic agents, minimally invasive surgery, TXA, tourniquet, hemostasis, no drains or catheters, restricted fluid balance, hypothermia prevention | Early mobilization, antalgic posture, multimodal opioid sparing analgesia, intermittent cryo-compression, wound management algorithm, negative pressure wound therapy, multimodal PONV prophylaxis, regular diet within 4 h after surgery |
| Savaridas et al. 2013 [158] | NR                                                                                                                          | NR                                                                                                                                                                                                                           | NR                                                                                                                                                                                                                                        |
| Stambough et al. 2019 [167] | Acetaminophen, celecoxib, oxycontin, midazolam                                                                              | General anesthesia, no peripheral nerve blocks, dexamethasone and TXA                                                                                                                                                        | Analgesic and pain therapy                                                                                                                                                                                                                |

|                              |                                                                                                   |                                                                                                                                                    |                                                                                                                                                                                     |
|------------------------------|---------------------------------------------------------------------------------------------------|----------------------------------------------------------------------------------------------------------------------------------------------------|-------------------------------------------------------------------------------------------------------------------------------------------------------------------------------------|
| Starks et al. 2014 [168]     | Pre-op education                                                                                  | Spinal anesthesia antibiotic prophylaxis, normothermia maintenance                                                                                 | Early mobilization, analgesic therapy (ovoid opiates when possible)                                                                                                                 |
| Stowers et al. 2016 [169]    | Patient education                                                                                 | Spinal or epidural anesthesia, +/- morphine antiemetics, TXA and cephazolin within 1 h of incision, catheter avoidance of surgical drains          | Early mobilization, analgesia (non-opioid, opioid PCA morphine/oxycodone/fentanyl if required, removed morning of 1st postoperative day), antiemetics and aperients, drains removal |
| Tucker et al. 2016 [173]     | Pre-op warming, carbohydrate drinks, analgesia, analgesic premedication on day of surgery         | Spinal anesthesia, capsular LIA, no catheter, TXA 1 g                                                                                              | Early mobilization, early oral hydration, thromboprophylaxis, analgesia                                                                                                             |
| Van Horne et al. 2019a [176] | JointCoach, pre-op education, non-opioid pain medication (acetaminophen, meloxicam, or celecoxib) | Spinal anesthesia, multimodal analgesia, TXA, no drains                                                                                            | Early mobilization, multimodal pain regimen (non-opioid analgesics and a 7-day opioid supply)                                                                                       |
| Van Horne et al. 2019b [177] | JointCoach, pre-op education, non-opioid pain medication (acetaminophen, meloxicam, or celecoxib) | Spinal anesthesia, multimodal analgesia, TXA, no drains                                                                                            | Early mobilization, multimodal pain regimen (non-opioid analgesics and a 7-day opioid supply)                                                                                       |
| Winther et al. 2015 [183]    | Oral and written information about surgery                                                        | Spinal and/or local analgesia, systemic analgesia, multimodal analgesia (paracetamol, dexamethasone, etoricoxib), intra-op fluid, TXA (max. 1.5 g) | Early mobilization, multimodal opioid-sparing analgesia, evaluation pain and at rest and pain at mobilization                                                                       |
| Xu et al. 2019 [186]         | NR                                                                                                | NR                                                                                                                                                 | NR                                                                                                                                                                                  |
| Yanik et al. 2018 [188]      | Pre-op education                                                                                  | Spinal anesthesia, no FNB, standardization of dressings, multimodal pain management                                                                | Early mobilization                                                                                                                                                                  |

**Abbreviations:** TXA = tranexamic acid; GDHM = Goal directed hemodynamic management; PPV = pulse pressure variability; SVV = stroke volume variability; CO = cardiac output; h = hours; LIA = local infiltration analgesia; IV = intravenous; NR = not reported; min = minutes; PONV = postoperative nausea and vomiting; PCA = patient-controlled analgesia; TIVA = Total intravenous anesthesia; LMWE = low-molecular-weight eparin; Hb = hemoglobin; NSAIDs = nonsteroidal anti-inflammatory drugs; MME = Morphine Milligram Equivalents; LOS = hospital length of stay; ESP = erector spinae plane; ACB = adductor canal block; ABT = allogeneic blood transfusions; OA = osteoarthritis; EQ = Euro Quality of Life; PES = pathway management solution; OKS = Oxford Knee Score; CACI = Adjusted Charlson Comorbidity Index; TED = thromboembolic decompression stockings; PACU = post-anesthesiological care unit; MP = methylprednisolone; FNB = femoral nerve block; LB-PAI = liposomal bupivacaine pericapsular injection; ACC = adductor canal catheter; iPACK = posterior capsule single shot block; pre-op = preoperative; IA = intra-articular; post-op = postoperative; PROMS = Patient-reported outcome scores; NRS = numerical rating scale; ICOAP = intermittent and constant osteoarthritis pain score; SF-12 = 12-item Short Form Health Survey; OHS = Oxford hip score; HOOS-PS = hip injury and osteoarthritis outcome score physical function short form; LINFA = local infusion analgesia; COX-2 = cyclooxygenase-2; KA = knee arthroplasty; TKA = total knee arthroplasty; THA = total hip arthroplasty; VAS = visual analog scale; DOACs = direct oral anticoagulants; VVLT = Visual Verbal Learning Test; intra-op = intraoperative.

**Table S8.** Designation of positive, neutral and negative outcome for each examined study.

| Surgery  | LOS                    | Pain      | Drain/catheter removal time | Functional recovery | Opioid consumption | Operative time                   | Costs    | Blood loss/ transfusion | Complication/ readmission | Early food recovery | Patient satisfaction | Early mobilization | Discharge |
|----------|------------------------|-----------|-----------------------------|---------------------|--------------------|----------------------------------|----------|-------------------------|---------------------------|---------------------|----------------------|--------------------|-----------|
| Elbow    | N=↓1/2                 | N=↓1/2    | N=↓1/2                      | N=↑1/2              |                    |                                  |          |                         |                           |                     |                      |                    |           |
| Thorax   | N=↓2/4                 | N=↓2/4    | N=↓2/4                      |                     | N=↓2/4             | N=↓1/4                           |          |                         | N=↓1/4                    |                     |                      | N=↑1/4             |           |
| Spine    | N=↓18/25<br>N=1/25 (=) | N=↓8/25   | N=↓2/25                     | N=↑1/25             | N=↓4/25            | N=↓4/25<br>N=1/25 (=)<br>N=↑1/25 | N=↓4/25  | N=↓7/25<br>N=1/25 (=)   | N=↓6/25                   | N=↓3/25             | N=↑1/25              | N=↑2/25            | N=↑1/25   |
| Hip/Knee | N=↓47/143              | N=↓26/143 | N=↓3/143                    | N=↑15/143           | N=↓16/143          | N=↓6/143                         | N=↓6/143 | N=↓16/143               | N=↓29/143                 | N=↑1/143            | N=↑18/143            | N=↑10/143          | N=↑12/143 |

|  |                |                                      |             |                |             |          |  |                                |             |  |  |             |  |
|--|----------------|--------------------------------------|-------------|----------------|-------------|----------|--|--------------------------------|-------------|--|--|-------------|--|
|  | N=4/143<br>(=) | N=5/143<br>(=)<br><br>N=3/143<br>(↑) | N=1/143 (=) | N=3/143<br>(=) | N=2/143 (=) | N=↑2/143 |  | N=2/143<br>(=)<br><br>N=↑3/143 | N=3/143 (=) |  |  | N=2/143 (=) |  |
|--|----------------|--------------------------------------|-------------|----------------|-------------|----------|--|--------------------------------|-------------|--|--|-------------|--|

**Abbreviations:** N = number of studies; ↑ = increase; ↓ = decrease; (=) = no difference.
